# Supplementary material for: Identification and Classification of Bronze Surface Diseases Based on Improved YOLOv5
Source: Research Square preprint supplement (doi:10.21203/rs.3.rs-6900599/v1), 2025-06-23
Supplement: Supplementary file 1 [file 03675196359b85c570c0a2cf.docx]

**Title**

| **Supporting Information** |
| --- |
| **Identification and Classification of Bronze Surface Diseases Based on Improved YOLOv5** |
| Han Wua, #,Wei Zhoua,, Yang Leib, *, Jing Yangb, #, Lijun Pangb, Xuegang Liuc, Shan Dingc, Yuqiu Chend, * |
| *a Jingmen Museum, 28 Jingshan Avenue, Duodao District, Jingmen 448001, China b School of Chemistry and Chemical Engineering, Hubei Key Laboratory of Coal Conversion and New Carbon Materials, Wuhan University of Science and Technology, Wuhan 430081, China c Jingzhou Conservation Center, 108 Jingbei Road, Jingzhou 434020, China d Department of Chemical and Biomolecular Engineering, University of Delaware, 150 Academy Street, Newark, Delaware 19716, United States* |
|
|
|
|
|
|
| **Corresponding author. E-mail address: leiyang@wust.edu.cn (Yang Lei); yuqch@udel.edu (Yuqiu Chen)* |

**Table of Contents**

| Table of Contents |
| --- |
| Table S1. The label information corresponding to the training set images |
| Table S2. The label information corresponding to the validation set images |
| Table S3. YOLOv5 code from PyCharm2021.3.1 |
| Table S4. yolov5s-GCB code from PyCharm2021.3.1 |
| Table S5. yolov5s_EfficientNetV2_CA code from PyCharm2021.3.1 |
| Table S6. yolov5s_EfficientNetV2 code from PyCharm2021.3.1 |
| Table S7. common.py code for adding network structure by PyCharm2021.3.1 |
| Table S8. yolo.py code for adding network structure by PyCharm2021.3.1 |
| Fig. S1. Original pictures of bronze wares |
| Fig. S2. Training set disease map |
| Fig. S3. Val set disease maps |

**Table S1. The label information corresponding to the training set images**

| Picture | x | y | w | h |
| --- | --- | --- | --- | --- |
| cracking(105).txt | 0.5025 | 0.3025 | 0.9950 | 0.2850 |
| cracking(106).txt | 0.4450 | 0.5350 | 0.8800 | 0.4100 |
| cracking(108).txt | 0.5025 | 0.4150 | 0.9950 | 0.2900 |
| cracking(11).txt | 0.5025 | 0.5775 | 0.9950 | 0.4950 |
| cracking(111).txt | 0.6125 | 0.5025 | 0.3850 | 0.9950 |
| cracking(12).txt | 0.4075 | 0.5025 | 0.5050 | 0.9950 |
| cracking(120).txt | 0.5025 | 0.4350 | 0.9950 | 0.1800 |
| cracking(122).txt | 0.5025 | 0.5800 | 0.9950 | 0.5500 |
| cracking(123).txt | 0.5025 | 0.5875 | 0.9950 | 0.7950 |
| cracking(124).txt | 0.4150 | 0.5000 | 0.4700 | 0.9900 |
| cracking(126).txt | 0.4575 | 0.5025 | 0.2650 | 0.9950 |
| cracking(13).txt | 0.5025 | 0.4125 | 0.9950 | 0.5050 |
| cracking(134).txt | 0.4850 | 0.5525 | 0.9100 | 0.4050 |
| cracking(138).txt | 0.4650 | 0.4875 | 0.3400 | 0.9350 |
| cracking(142).txt | 0.5000 | 0.4025 | 0.9900 | 0.5350 |
| cracking(16).txt | 0.5025 | 0.5975 | 0.9950 | 0.5950 |
| cracking(160).txt | 0.5025 | 0.5200 | 0.9950 | 0.2800 |
| cracking(161).txt | 0.5025 | 0.4900 | 0.9950 | 0.4300 |
| cracking(163).txt | 0.5475 | 0.5300 | 0.8350 | 0.9200 |
| cracking(165).txt | 0.5025 | 0.4875 | 0.9950 | 0.6950 |
| cracking(166).txt | 0.4850 | 0.5025 | 0.2400 | 0.9950 |
| cracking(167).txt | 0.4875 | 0.5025 | 0.6250 | 0.9950 |
| cracking(168).txt | 0.4900 | 0.4850 | 0.9700 | 0.7000 |
| cracking(170).txt | 0.5475 | 0.4675 | 0.2750 | 0.9250 |
| cracking(171).txt | 0.6050 | 0.4250 | 0.6100 | 0.8400 |
| cracking(172).txt | 0.5600 | 0.4750 | 0.8700 | 0.5100 |
| cracking(173).txt | 0.5400 | 0.5625 | 0.9200 | 0.2950 |
| cracking(174).txt | 0.5875 | 0.6025 | 0.8250 | 0.7350 |
| cracking(175).txt | 0.4725 | 0.5375 | 0.2650 | 0.9250 |
| cracking(176).txt | 0.4425 | 0.5350 | 0.8750 | 0.5300 |
| cracking(177).txt | 0.4500 | 0.4425 | 0.8900 | 0.4450 |
| cracking(18).txt | 0.4975 | 0.7400 | 0.9850 | 0.4200 |
| cracking(181).txt | 0.4100 | 0.7075 | 0.2700 | 0.5850 |
| cracking(181).txt | 0.6000 | 0.2250 | 0.3000 | 0.4300 |
| cracking(182).txt | 0.5050 | 0.4850 | 0.9900 | 0.3300 |
| cracking(183).txt | 0.4775 | 0.5475 | 0.9450 | 0.8450 |
| cracking(184).txt | 0.4675 | 0.5025 | 0.5250 | 0.9950 |
| cracking(185).txt | 0.5000 | 0.4250 | 0.9900 | 0.7000 |
| cracking(186).txt | 0.5025 | 0.4700 | 0.9950 | 0.5400 |
| cracking(187).txt | 0.5950 | 0.4850 | 0.8100 | 0.9600 |
| cracking(188).txt | 0.5150 | 0.5025 | 0.5800 | 0.9950 |
| cracking(189).txt | 0.5025 | 0.5625 | 0.9950 | 0.5550 |
| cracking(19).txt | 0.6100 | 0.4500 | 0.7800 | 0.8900 |
| cracking(190).txt | 0.5025 | 0.5625 | 0.9950 | 0.6550 |
| cracking(191).txt | 0.5025 | 0.5325 | 0.9950 | 0.3050 |
| cracking(192).txt | 0.4650 | 0.5100 | 0.7700 | 0.9800 |
| cracking(193).txt | 0.3925 | 0.5050 | 0.5750 | 0.9900 |
| cracking(194).txt | 0.4150 | 0.3450 | 0.8200 | 0.6800 |
| cracking(195).txt | 0.6350 | 0.6600 | 0.7300 | 0.2900 |
| cracking(196).txt | 0.4925 | 0.7125 | 0.3250 | 0.5750 |
| cracking(197).txt | 0.2875 | 0.6300 | 0.5650 | 0.7400 |
| cracking(198).txt | 0.3700 | 0.2475 | 0.7300 | 0.4850 |
| cracking(2).txt | 0.6850 | 0.5050 | 0.5200 | 0.9900 |
| cracking(204).txt | 0.5775 | 0.4100 | 0.7150 | 0.7900 |
| cracking(205).txt | 0.4775 | 0.5025 | 0.7050 | 0.9950 |
| cracking(206).txt | 0.5525 | 0.5025 | 0.3750 | 0.9950 |
| cracking(207).txt | 0.3425 | 0.5575 | 0.6750 | 0.8350 |
| cracking(208).txt | 0.4925 | 0.5025 | 0.4750 | 0.9950 |
| cracking(209).txt | 0.5550 | 0.5025 | 0.2300 | 0.9950 |
| cracking(21).txt | 0.3850 | 0.5025 | 0.7600 | 0.8750 |
| cracking(210).txt | 0.4650 | 0.3100 | 0.9200 | 0.4600 |
| cracking(211).txt | 0.5025 | 0.5500 | 0.9950 | 0.2600 |
| cracking(212).txt | 0.4925 | 0.5025 | 0.2250 | 0.9950 |
| cracking(213).txt | 0.5025 | 0.3450 | 0.9950 | 0.3100 |
| cracking(214).txt | 0.5025 | 0.3875 | 0.9950 | 0.3350 |
| cracking(215).txt | 0.4925 | 0.3425 | 0.9650 | 0.6750 |
| cracking(216).txt | 0.5025 | 0.3425 | 0.9950 | 0.3850 |
| cracking(217).txt | 0.2475 | 0.5025 | 0.4850 | 0.9950 |
| cracking(218).txt | 0.4100 | 0.6250 | 0.7400 | 0.7500 |
| cracking(23).txt | 0.3925 | 0.8025 | 0.7750 | 0.3950 |
| cracking(24).txt | 0.5025 | 0.2375 | 0.9950 | 0.4650 |
| cracking(27).txt | 0.3150 | 0.5025 | 0.2100 | 0.9950 |
| cracking(28).txt | 0.6150 | 0.5900 | 0.7500 | 0.8200 |
| cracking(3).txt | 0.4950 | 0.6825 | 0.9800 | 0.4950 |
| cracking(30).txt | 0.2375 | 0.5300 | 0.2150 | 0.9400 |
| cracking(31).txt | 0.4375 | 0.2900 | 0.8250 | 0.5600 |
| cracking(32).txt | 0.4075 | 0.3675 | 0.8050 | 0.7250 |
| cracking(36).txt | 0.3150 | 0.3950 | 0.6200 | 0.7800 |
| cracking(37).txt | 0.3750 | 0.3625 | 0.7400 | 0.1750 |
| cracking(37).txt | 0.8600 | 0.1875 | 0.2700 | 0.3150 |
| cracking(39).txt | 0.2050 | 0.3500 | 0.4000 | 0.6900 |
| cracking(4).txt | 0.5025 | 0.3075 | 0.9950 | 0.4850 |
| cracking(42).txt | 0.5325 | 0.5025 | 0.2350 | 0.9950 |
| cracking(43).txt | 0.3700 | 0.5025 | 0.3400 | 0.9950 |
| cracking(52).txt | 0.6100 | 0.5850 | 0.1500 | 0.8300 |
| cracking(54).txt | 0.5225 | 0.5025 | 0.1950 | 0.9950 |
| cracking(55).txt | 0.1175 | 0.7000 | 0.0750 | 0.5700 |
| cracking(55).txt | 0.4125 | 0.5000 | 0.4750 | 0.9900 |
| cracking(57).txt | 0.7950 | 0.5025 | 0.1900 | 0.9950 |
| cracking(57).txt | 0.1825 | 0.8850 | 0.1350 | 0.2300 |
| cracking(58).txt | 0.5750 | 0.6225 | 0.2000 | 0.7450 |
| cracking(59).txt | 0.7575 | 0.3150 | 0.1450 | 0.5700 |
| cracking(60).txt | 0.3325 | 0.5250 | 0.6550 | 0.9500 |
| cracking(61).txt | 0.6975 | 0.5025 | 0.1150 | 0.9950 |
| cracking(61).txt | 0.5250 | 0.7375 | 0.2500 | 0.5250 |
| cracking(62).txt | 0.1425 | 0.8450 | 0.1050 | 0.3100 |
| cracking(62).txt | 0.4075 | 0.5025 | 0.3150 | 0.9950 |
| cracking(63).txt | 0.5775 | 0.5025 | 0.1650 | 0.9950 |
| cracking(63).txt | 0.7550 | 0.2625 | 0.2800 | 0.5150 |
| cracking(64).txt | 0.8225 | 0.5025 | 0.3350 | 0.9950 |
| cracking(64).txt | 0.6025 | 0.4200 | 0.2750 | 0.4300 |
| cracking(66).txt | 0.5025 | 0.4575 | 0.9950 | 0.5350 |
| cracking(67).txt | 0.4475 | 0.4900 | 0.8850 | 0.9700 |
| cracking(68).txt | 0.2150 | 0.4775 | 0.4200 | 0.9450 |
| cracking(69).txt | 0.4025 | 0.5025 | 0.3350 | 0.9950 |
| cracking(70).txt | 0.4275 | 0.7050 | 0.0850 | 0.5900 |
| cracking(70).txt | 0.5800 | 0.3575 | 0.2600 | 0.7050 |
| cracking(71).txt | 0.3275 | 0.5025 | 0.2250 | 0.9950 |
| cracking(72).txt | 0.4375 | 0.5025 | 0.1950 | 0.9950 |
| cracking(72).txt | 0.7300 | 0.5025 | 0.5400 | 0.9950 |
| cracking(74).txt | 0.3250 | 0.6350 | 0.3900 | 0.7100 |
| cracking(74).txt | 0.7375 | 0.2725 | 0.4950 | 0.5250 |
| cracking(76).txt | 0.5025 | 0.6075 | 0.9950 | 0.6550 |
| cracking(77).txt | 0.6050 | 0.5050 | 0.3700 | 0.8500 |
| cracking(79).txt | 0.2650 | 0.5025 | 0.2700 | 0.9950 |
| cracking(82).txt | 0.0950 | 0.5375 | 0.1500 | 0.9250 |
| cracking(82).txt | 0.3475 | 0.4125 | 0.4650 | 0.8150 |
| cracking(83).txt | 0.6100 | 0.5025 | 0.1700 | 0.9950 |
| cracking(84).txt | 0.8400 | 0.5025 | 0.3200 | 0.9950 |
| cracking(86).txt | 0.3925 | 0.5825 | 0.5050 | 0.8350 |
| cracking(86).txt | 0.7800 | 0.4200 | 0.4400 | 0.3100 |
| cracking(87).txt | 0.3200 | 0.6800 | 0.3600 | 0.6400 |
| cracking(87).txt | 0.3450 | 0.3600 | 0.1500 | 0.7100 |
| cracking(92).txt | 0.5025 | 0.4350 | 0.9950 | 0.2600 |
| holes (1).txt | 0.5600 | 0.3200 | 0.1600 | 0.1600 |
| holes (1).txt | 0.9350 | 0.5300 | 0.1000 | 0.1100 |
| holes (100).txt | 0.2875 | 0.2425 | 0.1650 | 0.1250 |
| holes (100).txt | 0.5375 | 0.5750 | 0.1050 | 0.1100 |
| holes (100).txt | 0.0800 | 0.0725 | 0.0700 | 0.0650 |
| holes (103).txt | 0.6150 | 0.2775 | 0.2400 | 0.1750 |
| holes (106).txt | 0.0550 | 0.2200 | 0.1000 | 0.0900 |
| holes (106).txt | 0.3100 | 0.3775 | 0.1100 | 0.1150 |
| holes (106).txt | 0.5125 | 0.8725 | 0.1750 | 0.1550 |
| holes (106).txt | 0.6300 | 0.3725 | 0.0900 | 0.0750 |
| holes (106).txt | 0.3200 | 0.1750 | 0.0500 | 0.0600 |
| holes (106).txt | 0.3625 | 0.2575 | 0.1150 | 0.0650 |
| holes (106).txt | 0.4900 | 0.2700 | 0.0900 | 0.0700 |
| holes (107).txt | 0.6875 | 0.5600 | 0.2250 | 0.2100 |
| holes (108).txt | 0.5825 | 0.1125 | 0.1650 | 0.1250 |
| holes (108).txt | 0.8450 | 0.4725 | 0.1600 | 0.1550 |
| holes (109).txt | 0.2000 | 0.2025 | 0.2400 | 0.1850 |
| holes (109).txt | 0.4825 | 0.2775 | 0.1350 | 0.1450 |
| holes (109).txt | 0.4825 | 0.1450 | 0.0850 | 0.0900 |
| holes (109).txt | 0.5950 | 0.1725 | 0.0700 | 0.1050 |
| holes (109).txt | 0.7700 | 0.2200 | 0.0600 | 0.1000 |
| holes (109).txt | 0.7325 | 0.6800 | 0.1350 | 0.0900 |
| holes (11).txt | 0.8375 | 0.6150 | 0.1550 | 0.2200 |
| holes (11).txt | 0.5775 | 0.6925 | 0.0550 | 0.1150 |
| holes (11).txt | 0.4900 | 0.8250 | 0.1000 | 0.1200 |
| holes (11).txt | 0.5325 | 0.9475 | 0.1150 | 0.1050 |
| holes (111).txt | 0.6600 | 0.5175 | 0.1700 | 0.1950 |
| holes (111).txt | 0.3550 | 0.1475 | 0.1100 | 0.1250 |
| holes (111).txt | 0.2225 | 0.2200 | 0.0850 | 0.0700 |
| holes (111).txt | 0.1425 | 0.3075 | 0.0950 | 0.1050 |
| holes (111).txt | 0.2100 | 0.3800 | 0.1500 | 0.1000 |
| holes (112).txt | 0.6750 | 0.5625 | 0.1400 | 0.0950 |
| holes (112).txt | 0.1900 | 0.6900 | 0.0800 | 0.1100 |
| holes (113).txt | 0.7625 | 0.5000 | 0.1350 | 0.1500 |
| holes (113).txt | 0.4575 | 0.7150 | 0.0850 | 0.1400 |
| holes (113).txt | 0.3850 | 0.9575 | 0.1600 | 0.0850 |
| holes (114).txt | 0.3175 | 0.5750 | 0.1750 | 0.1100 |
| holes (114).txt | 0.1425 | 0.2900 | 0.1550 | 0.0900 |
| holes (115).txt | 0.6725 | 0.1900 | 0.1650 | 0.1200 |
| holes (115).txt | 0.3125 | 0.6150 | 0.1650 | 0.1900 |
| holes (117).txt | 0.4600 | 0.4000 | 0.2200 | 0.2300 |
| holes (118).txt | 0.8400 | 0.3350 | 0.1200 | 0.1900 |
| holes (12).txt | 0.8525 | 0.5175 | 0.2050 | 0.2150 |
| holes (12).txt | 0.6425 | 0.6650 | 0.0850 | 0.1400 |
| holes (12).txt | 0.7525 | 0.7050 | 0.0850 | 0.1400 |
| holes (12).txt | 0.5925 | 0.8075 | 0.1150 | 0.1250 |
| holes (12).txt | 0.6375 | 0.9325 | 0.1050 | 0.0850 |
| holes (12).txt | 0.9250 | 0.8925 | 0.0800 | 0.1250 |
| holes (12).txt | 0.8375 | 0.9550 | 0.0650 | 0.0900 |
| holes (120).txt | 0.6125 | 0.4275 | 0.1750 | 0.1150 |
| holes (121).txt | 0.6200 | 0.4425 | 0.2200 | 0.1550 |
| holes (123).txt | 0.3975 | 0.2150 | 0.1850 | 0.2200 |
| holes (125).txt | 0.3550 | 0.7425 | 0.2800 | 0.2050 |
| holes (126).txt | 0.8775 | 0.4775 | 0.1550 | 0.2450 |
| holes (127).txt | 0.3725 | 0.6650 | 0.1750 | 0.2100 |
| holes (129).txt | 0.7625 | 0.5500 | 0.1150 | 0.2100 |
| holes (129).txt | 0.5500 | 0.2925 | 0.1300 | 0.1650 |
| holes (13).txt | 0.8575 | 0.4350 | 0.2150 | 0.1600 |
| holes (13).txt | 0.6900 | 0.6250 | 0.1900 | 0.1500 |
| holes (13).txt | 0.6675 | 0.7725 | 0.1350 | 0.1050 |
| holes (13).txt | 0.7500 | 0.8825 | 0.1100 | 0.0950 |
| holes (13).txt | 0.9375 | 0.8850 | 0.1050 | 0.0900 |
| holes (131).txt | 0.3800 | 0.4925 | 0.1300 | 0.1450 |
| holes (132).txt | 0.8975 | 0.4225 | 0.2050 | 0.1450 |
| holes (134).txt | 0.8875 | 0.4500 | 0.2250 | 0.1900 |
| holes (135).txt | 0.7900 | 0.1925 | 0.1000 | 0.1050 |
| holes (136).txt | 0.5675 | 0.5100 | 0.1750 | 0.1400 |
| holes (137).txt | 0.4925 | 0.3100 | 0.2350 | 0.2200 |
| holes (139).txt | 0.7875 | 0.5100 | 0.1950 | 0.1900 |
| holes (14).txt | 0.7775 | 0.3475 | 0.1450 | 0.2250 |
| holes (14).txt | 0.7100 | 0.5750 | 0.1300 | 0.1500 |
| holes (14).txt | 0.7250 | 0.7200 | 0.1200 | 0.1400 |
| holes (14).txt | 0.8575 | 0.7925 | 0.1150 | 0.1450 |
| holes (14).txt | 0.8475 | 0.5600 | 0.0950 | 0.1400 |
| holes (140).txt | 0.2700 | 0.3950 | 0.2200 | 0.1700 |
| holes (143).txt | 0.2350 | 0.3350 | 0.2000 | 0.1500 |
| holes (144).txt | 0.3625 | 0.1975 | 0.2150 | 0.1750 |
| holes (145).txt | 0.4725 | 0.3700 | 0.2150 | 0.1700 |
| holes (146).txt | 0.4100 | 0.3250 | 0.2000 | 0.1800 |
| holes (147).txt | 0.5925 | 0.3625 | 0.1550 | 0.1450 |
| holes (148).txt | 0.6050 | 0.3550 | 0.1200 | 0.1600 |
| holes (15).txt | 0.7525 | 0.2650 | 0.1850 | 0.1800 |
| holes (15).txt | 0.7000 | 0.5200 | 0.1000 | 0.1300 |
| holes (15).txt | 0.7875 | 0.6525 | 0.1050 | 0.1450 |
| holes (15).txt | 0.9275 | 0.7100 | 0.1250 | 0.1500 |
| holes (150).txt | 0.3250 | 0.4175 | 0.1200 | 0.1350 |
| holes (151).txt | 0.1825 | 0.7300 | 0.1950 | 0.1900 |
| holes (152).txt | 0.5000 | 0.4225 | 0.1400 | 0.1350 |
| holes (153).txt | 0.4100 | 0.4025 | 0.1200 | 0.1150 |
| holes (156).txt | 0.4625 | 0.6850 | 0.1250 | 0.1400 |
| holes (158).txt | 0.5650 | 0.3300 | 0.1900 | 0.1300 |
| holes (160).txt | 0.3450 | 0.2525 | 0.2400 | 0.2750 |
| holes (161).txt | 0.8475 | 0.4825 | 0.1950 | 0.1850 |
| holes (162).txt | 0.6450 | 0.5250 | 0.1700 | 0.1500 |
| holes (163).txt | 0.5425 | 0.5575 | 0.2550 | 0.2450 |
| holes (163).txt | 0.1625 | 0.9300 | 0.1850 | 0.1400 |
| holes (168).txt | 0.7025 | 0.5650 | 0.1450 | 0.2300 |
| holes (169).txt | 0.1625 | 0.3550 | 0.1950 | 0.1600 |
| holes (17).txt | 0.6025 | 0.2025 | 0.1450 | 0.1550 |
| holes (17).txt | 0.9550 | 0.4650 | 0.0800 | 0.1200 |
| holes (17).txt | 0.6525 | 0.4250 | 0.0950 | 0.1100 |
| holes (17).txt | 0.8175 | 0.4900 | 0.0650 | 0.1200 |
| holes (17).txt | 0.7550 | 0.3400 | 0.0700 | 0.1200 |
| holes (17).txt | 0.9725 | 0.1975 | 0.0550 | 0.0750 |
| holes (171).txt | 0.5700 | 0.2150 | 0.1900 | 0.1800 |
| holes (172).txt | 0.6975 | 0.2875 | 0.1950 | 0.1550 |
| holes (173).txt | 0.6525 | 0.3825 | 0.1250 | 0.1050 |
| holes (174).txt | 0.3575 | 0.3400 | 0.1950 | 0.1800 |
| holes (175).txt | 0.3875 | 0.5175 | 0.2150 | 0.2850 |
| holes (176).txt | 0.5725 | 0.2875 | 0.2650 | 0.2350 |
| holes (177).txt | 0.6275 | 0.2375 | 0.2550 | 0.1950 |
| holes (178).txt | 0.6350 | 0.3425 | 0.1100 | 0.1450 |
| holes (18).txt | 0.6700 | 0.6300 | 0.2800 | 0.3200 |
| holes (184).txt | 0.4700 | 0.3475 | 0.2000 | 0.1950 |
| holes (186).txt | 0.5350 | 0.5050 | 0.1300 | 0.1100 |
| holes (189).txt | 0.5250 | 0.4900 | 0.2400 | 0.2000 |
| holes (19).txt | 0.6025 | 0.6975 | 0.2950 | 0.2850 |
| holes (190).txt | 0.3500 | 0.2650 | 0.2000 | 0.1300 |
| holes (193).txt | 0.4650 | 0.3875 | 0.1700 | 0.1550 |
| holes (193).txt | 0.6900 | 0.3375 | 0.1900 | 0.1150 |
| holes (194).txt | 0.3325 | 0.6650 | 0.1350 | 0.1600 |
| holes (194).txt | 0.2225 | 0.5925 | 0.1450 | 0.1250 |
| holes (195).txt | 0.2450 | 0.1975 | 0.1500 | 0.1350 |
| holes (195).txt | 0.3725 | 0.1050 | 0.1650 | 0.1300 |
| holes (196).txt | 0.2575 | 0.2075 | 0.1850 | 0.1650 |
| holes (196).txt | 0.3050 | 0.4150 | 0.1800 | 0.1400 |
| holes (197).txt | 0.4975 | 0.7100 | 0.1250 | 0.1500 |
| holes (197).txt | 0.7025 | 0.8200 | 0.2150 | 0.2100 |
| holes (198).txt | 0.3650 | 0.3000 | 0.1200 | 0.1300 |
| holes (199).txt | 0.5375 | 0.3450 | 0.1050 | 0.0900 |
| holes (199).txt | 0.5850 | 0.4725 | 0.0800 | 0.0950 |
| holes (199).txt | 0.2375 | 0.2775 | 0.0950 | 0.0850 |
| holes (199).txt | 0.3000 | 0.5500 | 0.1000 | 0.1400 |
| holes (20).txt | 0.4450 | 0.7000 | 0.3400 | 0.2700 |
| holes (200).txt | 0.2225 | 0.3350 | 0.1150 | 0.1400 |
| holes (200).txt | 0.1825 | 0.2025 | 0.1050 | 0.1050 |
| holes (201).txt | 0.2350 | 0.2950 | 0.1700 | 0.2000 |
| holes (201).txt | 0.3875 | 0.2675 | 0.1750 | 0.1150 |
| holes (201).txt | 0.1125 | 0.2900 | 0.1150 | 0.1100 |
| holes (201).txt | 0.6625 | 0.5925 | 0.1150 | 0.1150 |
| holes (202).txt | 0.5525 | 0.5425 | 0.0950 | 0.1150 |
| holes (203).txt | 0.3600 | 0.5300 | 0.2100 | 0.1600 |
| holes (203).txt | 0.3125 | 0.2825 | 0.1850 | 0.2550 |
| holes (204).txt | 0.5400 | 0.3250 | 0.2300 | 0.2200 |
| holes (204).txt | 0.2575 | 0.4125 | 0.2550 | 0.2350 |
| holes (205).txt | 0.8125 | 0.4975 | 0.2150 | 0.2050 |
| holes (206).txt | 0.4250 | 0.4125 | 0.1600 | 0.1950 |
| holes (207).txt | 0.1350 | 0.1150 | 0.1500 | 0.2000 |
| holes (207).txt | 0.5300 | 0.6400 | 0.1500 | 0.1300 |
| holes (208).txt | 0.6100 | 0.4475 | 0.2300 | 0.2650 |
| holes (209).txt | 0.2950 | 0.4650 | 0.2000 | 0.1900 |
| holes (209).txt | 0.5375 | 0.2875 | 0.1250 | 0.1250 |
| holes (209).txt | 0.6450 | 0.2850 | 0.1000 | 0.1000 |
| holes (209).txt | 0.6650 | 0.7550 | 0.1200 | 0.1900 |
| holes (21).txt | 0.6375 | 0.3675 | 0.2650 | 0.2650 |
| holes (210).txt | 0.2325 | 0.2550 | 0.1150 | 0.1200 |
| holes (211).txt | 0.4350 | 0.6125 | 0.2200 | 0.2250 |
| holes (211).txt | 0.2825 | 0.5775 | 0.1250 | 0.1050 |
| holes (212).txt | 0.3900 | 0.3825 | 0.1800 | 0.1450 |
| holes (214).txt | 0.2900 | 0.4800 | 0.2200 | 0.1700 |
| holes (216).txt | 0.2950 | 0.0850 | 0.1900 | 0.1600 |
| holes (216).txt | 0.6500 | 0.2625 | 0.0900 | 0.1450 |
| holes (216).txt | 0.8850 | 0.8575 | 0.1400 | 0.1150 |
| holes (216).txt | 0.7125 | 0.1175 | 0.0850 | 0.0850 |
| holes (216).txt | 0.8175 | 0.1575 | 0.0750 | 0.0850 |
| holes (218).txt | 0.2250 | 0.4825 | 0.2000 | 0.1650 |
| holes (218).txt | 0.4875 | 0.3275 | 0.1750 | 0.0950 |
| holes (218).txt | 0.6675 | 0.1325 | 0.0850 | 0.1350 |
| holes (218).txt | 0.5750 | 0.3400 | 0.0800 | 0.0600 |
| holes (218).txt | 0.6000 | 0.7850 | 0.1600 | 0.1500 |
| holes (218).txt | 0.8975 | 0.9225 | 0.0850 | 0.0650 |
| holes (218).txt | 0.9500 | 0.7875 | 0.0900 | 0.0950 |
| holes (219).txt | 0.5500 | 0.4200 | 0.1500 | 0.1900 |
| holes (219).txt | 0.9175 | 0.4500 | 0.1550 | 0.1400 |
| holes (219).txt | 0.2475 | 0.7350 | 0.0750 | 0.0800 |
| holes (22).txt | 0.6925 | 0.6775 | 0.2850 | 0.2950 |
| holes (22).txt | 0.2250 | 0.9050 | 0.1000 | 0.1300 |
| holes (22).txt | 0.2500 | 0.7800 | 0.0700 | 0.0700 |
| holes (22).txt | 0.4225 | 0.9450 | 0.0650 | 0.0800 |
| holes (22).txt | 0.3225 | 0.8950 | 0.1150 | 0.0900 |
| holes (220).txt | 0.7375 | 0.5525 | 0.2650 | 0.2150 |
| holes (221).txt | 0.2400 | 0.6200 | 0.2300 | 0.1700 |
| holes (223).txt | 0.1375 | 0.2400 | 0.1350 | 0.1500 |
| holes (224).txt | 0.7650 | 0.3975 | 0.1800 | 0.2250 |
| holes (226).txt | 0.4675 | 0.4725 | 0.1750 | 0.2350 |
| holes (228).txt | 0.3825 | 0.2450 | 0.1950 | 0.2600 |
| holes (228).txt | 0.9150 | 0.5150 | 0.1300 | 0.1400 |
| holes (228).txt | 0.9625 | 0.3150 | 0.0750 | 0.1000 |
| holes (229).txt | 0.3100 | 0.5450 | 0.1600 | 0.1500 |
| holes (229).txt | 0.2150 | 0.5550 | 0.0900 | 0.1200 |
| holes (229).txt | 0.7650 | 0.3200 | 0.1300 | 0.1000 |
| holes (229).txt | 0.9150 | 0.3225 | 0.1200 | 0.0850 |
| holes (229).txt | 0.9350 | 0.9550 | 0.1100 | 0.0900 |
| holes (23).txt | 0.6100 | 0.4625 | 0.2100 | 0.2350 |
| holes (230).txt | 0.4700 | 0.3200 | 0.1800 | 0.1800 |
| holes (231).txt | 0.4400 | 0.3150 | 0.1900 | 0.1400 |
| holes (231).txt | 0.8175 | 0.5550 | 0.1050 | 0.1200 |
| holes (231).txt | 0.8800 | 0.3850 | 0.1100 | 0.1000 |
| holes (232).txt | 0.3300 | 0.4400 | 0.2600 | 0.2100 |
| holes (234).txt | 0.5525 | 0.5950 | 0.2250 | 0.2400 |
| holes (234).txt | 0.4825 | 0.7150 | 0.1150 | 0.0800 |
| holes (235).txt | 0.3475 | 0.3675 | 0.2850 | 0.1850 |
| holes (235).txt | 0.8025 | 0.6450 | 0.1450 | 0.1800 |
| holes (235).txt | 0.8700 | 0.4475 | 0.1600 | 0.1050 |
| holes (235).txt | 0.4775 | 0.6250 | 0.1450 | 0.1300 |
| holes (237).txt | 0.4400 | 0.2700 | 0.2400 | 0.2000 |
| holes (238).txt | 0.6225 | 0.3975 | 0.2250 | 0.3050 |
| holes (239).txt | 0.4600 | 0.8150 | 0.1900 | 0.2500 |
| holes (239).txt | 0.6150 | 0.7600 | 0.1700 | 0.2200 |
| holes (24).txt | 0.5725 | 0.4050 | 0.1350 | 0.2700 |
| holes (240).txt | 0.3800 | 0.3975 | 0.1800 | 0.1750 |
| holes (240).txt | 0.9275 | 0.4425 | 0.1450 | 0.1550 |
| holes (241).txt | 0.4300 | 0.2625 | 0.2200 | 0.2050 |
| holes (241).txt | 0.9200 | 0.5750 | 0.1600 | 0.1900 |
| holes (242).txt | 0.2550 | 0.5025 | 0.1900 | 0.2050 |
| holes (243).txt | 0.3875 | 0.7150 | 0.1650 | 0.1700 |
| holes (244).txt | 0.4200 | 0.4700 | 0.2600 | 0.2600 |
| holes (244).txt | 0.2175 | 0.4275 | 0.1950 | 0.2050 |
| holes (245).txt | 0.4225 | 0.3175 | 0.2650 | 0.2550 |
| holes (245).txt | 0.9275 | 0.6725 | 0.1450 | 0.1850 |
| holes (246).txt | 0.5075 | 0.3475 | 0.2950 | 0.2450 |
| holes (247).txt | 0.8000 | 0.6900 | 0.3600 | 0.3400 |
| holes (248).txt | 0.4525 | 0.4975 | 0.3750 | 0.3050 |
| holes (249).txt | 0.6525 | 0.4725 | 0.3150 | 0.2250 |
| holes (25).txt | 0.5900 | 0.4225 | 0.1700 | 0.2750 |
| holes (250).txt | 0.6625 | 0.4525 | 0.2350 | 0.2050 |
| holes (251).txt | 0.5100 | 0.4275 | 0.2000 | 0.2550 |
| holes (252).txt | 0.4925 | 0.5550 | 0.3150 | 0.3300 |
| holes (255).txt | 0.4875 | 0.5025 | 0.3050 | 0.4450 |
| holes (256).txt | 0.3550 | 0.4375 | 0.2400 | 0.2550 |
| holes (257).txt | 0.4875 | 0.3475 | 0.4850 | 0.3550 |
| holes (258).txt | 0.7375 | 0.4500 | 0.3750 | 0.3100 |
| holes (259).txt | 0.5750 | 0.6500 | 0.3100 | 0.2700 |
| holes (26).txt | 0.5600 | 0.3850 | 0.2200 | 0.2600 |
| holes (26).txt | 0.0975 | 0.2800 | 0.1850 | 0.1800 |
| holes (26).txt | 0.3600 | 0.1300 | 0.1500 | 0.1400 |
| holes (260).txt | 0.3575 | 0.2850 | 0.2350 | 0.2200 |
| holes (260).txt | 0.7900 | 0.5475 | 0.1800 | 0.1950 |
| holes (260).txt | 0.8875 | 0.3350 | 0.1450 | 0.1500 |
| holes (261).txt | 0.4700 | 0.3475 | 0.3700 | 0.2850 |
| holes (263).txt | 0.5775 | 0.4050 | 0.3250 | 0.2700 |
| holes (265).txt | 0.8200 | 0.3950 | 0.2200 | 0.2400 |
| holes (266).txt | 0.3850 | 0.4900 | 0.2600 | 0.2100 |
| holes (267).txt | 0.6075 | 0.6250 | 0.2650 | 0.2500 |
| holes (268).txt | 0.5275 | 0.3950 | 0.2250 | 0.2600 |
| holes (269).txt | 0.8425 | 0.4175 | 0.2350 | 0.1850 |
| holes (27).txt | 0.5700 | 0.4875 | 0.3100 | 0.3450 |
| holes (270).txt | 0.8775 | 0.3400 | 0.1950 | 0.1700 |
| holes (271).txt | 0.3125 | 0.1775 | 0.1650 | 0.1750 |
| holes (271).txt | 0.6350 | 0.5800 | 0.1700 | 0.2000 |
| holes (272).txt | 0.1750 | 0.4525 | 0.2900 | 0.1950 |
| holes (272).txt | 0.7175 | 0.6025 | 0.2250 | 0.1550 |
| holes (273).txt | 0.2150 | 0.6625 | 0.2000 | 0.1650 |
| holes (273).txt | 0.7425 | 0.4775 | 0.1450 | 0.1550 |
| holes (274).txt | 0.7250 | 0.3600 | 0.2200 | 0.1900 |
| holes (274).txt | 0.2525 | 0.7750 | 0.1650 | 0.1700 |
| holes (275).txt | 0.5825 | 0.2850 | 0.1750 | 0.1600 |
| holes (275).txt | 0.4275 | 0.8575 | 0.0950 | 0.2050 |
| holes (277).txt | 0.3575 | 0.5525 | 0.2250 | 0.1850 |
| holes (278).txt | 0.3700 | 0.6850 | 0.2100 | 0.1700 |
| holes (279).txt | 0.3075 | 0.4650 | 0.2150 | 0.2100 |
| holes (279).txt | 0.6000 | 0.4750 | 0.2100 | 0.1800 |
| holes (28).txt | 0.6100 | 0.6000 | 0.1900 | 0.1500 |
| holes (28).txt | 0.9225 | 0.7050 | 0.0950 | 0.1600 |
| holes (28).txt | 0.9550 | 0.5650 | 0.0900 | 0.1000 |
| holes (28).txt | 0.1650 | 0.3825 | 0.1500 | 0.1050 |
| holes (28).txt | 0.3950 | 0.1950 | 0.1200 | 0.0900 |
| holes (28).txt | 0.5325 | 0.1675 | 0.1250 | 0.0750 |
| holes (280).txt | 0.4800 | 0.5600 | 0.2700 | 0.2200 |
| holes (281).txt | 0.2625 | 0.2000 | 0.1950 | 0.1900 |
| holes (282).txt | 0.6875 | 0.4500 | 0.2150 | 0.2200 |
| holes (284).txt | 0.8150 | 0.2550 | 0.2300 | 0.2100 |
| holes (284).txt | 0.3950 | 0.8500 | 0.2100 | 0.3000 |
| holes (285).txt | 0.5725 | 0.4650 | 0.3550 | 0.2400 |
| holes (286).txt | 0.4950 | 0.5000 | 0.2600 | 0.2600 |
| holes (287).txt | 0.2775 | 0.3800 | 0.2050 | 0.1800 |
| holes (288).txt | 0.1275 | 0.1675 | 0.2450 | 0.1950 |
| holes (288).txt | 0.6075 | 0.7900 | 0.1550 | 0.1700 |
| holes (289).txt | 0.5300 | 0.1400 | 0.1600 | 0.1500 |
| holes (29).txt | 0.3025 | 0.4075 | 0.1350 | 0.1650 |
| holes (290).txt | 0.8800 | 0.4050 | 0.2100 | 0.2200 |
| holes (291).txt | 0.7375 | 0.4125 | 0.2450 | 0.2250 |
| holes (292).txt | 0.5725 | 0.4250 | 0.2250 | 0.1500 |
| holes (293).txt | 0.3700 | 0.3700 | 0.1500 | 0.1600 |
| holes (294).txt | 0.6600 | 0.3825 | 0.1900 | 0.2050 |
| holes (295).txt | 0.4975 | 0.2800 | 0.1950 | 0.2000 |
| holes (296).txt | 0.8125 | 0.3575 | 0.1350 | 0.1650 |
| holes (297).txt | 0.4550 | 0.0925 | 0.1800 | 0.1350 |
| holes (297).txt | 0.6625 | 0.8675 | 0.1550 | 0.1550 |
| holes (299).txt | 0.8150 | 0.2675 | 0.2100 | 0.2450 |
| holes (3).txt | 0.4700 | 0.0550 | 0.1300 | 0.1000 |
| holes (3).txt | 0.2150 | 0.4000 | 0.1500 | 0.1500 |
| holes (30).txt | 0.6375 | 0.3525 | 0.1250 | 0.1450 |
| holes (31).txt | 0.2800 | 0.3225 | 0.1500 | 0.1050 |
| holes (31).txt | 0.1800 | 0.3025 | 0.0400 | 0.0650 |
| holes (31).txt | 0.0450 | 0.2700 | 0.0700 | 0.0600 |
| holes (31).txt | 0.6075 | 0.1450 | 0.0650 | 0.0800 |
| holes (31).txt | 0.7400 | 0.1500 | 0.0900 | 0.0500 |
| holes (31).txt | 0.7450 | 0.7025 | 0.1500 | 0.1750 |
| holes (32).txt | 0.3350 | 0.3925 | 0.1500 | 0.1350 |
| holes (32).txt | 0.4975 | 0.2725 | 0.1150 | 0.1150 |
| holes (32).txt | 0.8575 | 0.3875 | 0.1250 | 0.1350 |
| holes (32).txt | 0.9775 | 0.4200 | 0.0450 | 0.2000 |
| holes (32).txt | 0.6025 | 0.4175 | 0.1350 | 0.1050 |
| holes (32).txt | 0.8800 | 0.1875 | 0.0800 | 0.1150 |
| holes (33).txt | 0.4275 | 0.5975 | 0.1950 | 0.2250 |
| holes (33).txt | 0.1425 | 0.0400 | 0.1650 | 0.0700 |
| holes (33).txt | 0.5400 | 0.0375 | 0.0700 | 0.0650 |
| holes (35).txt | 0.2625 | 0.1600 | 0.1350 | 0.1000 |
| holes (35).txt | 0.6325 | 0.6525 | 0.1250 | 0.1550 |
| holes (35).txt | 0.7450 | 0.2750 | 0.1100 | 0.0800 |
| holes (35).txt | 0.4775 | 0.2800 | 0.0950 | 0.0900 |
| holes (35).txt | 0.5100 | 0.1800 | 0.0700 | 0.0500 |
| holes (35).txt | 0.5950 | 0.1975 | 0.0400 | 0.0550 |
| holes (35).txt | 0.3550 | 0.3100 | 0.1200 | 0.1100 |
| holes (37).txt | 0.3475 | 0.5425 | 0.1650 | 0.1150 |
| holes (37).txt | 0.9125 | 0.6450 | 0.0950 | 0.1400 |
| holes (37).txt | 0.0475 | 0.5575 | 0.0850 | 0.0650 |
| holes (38).txt | 0.9175 | 0.3900 | 0.1450 | 0.1500 |
| holes (38).txt | 0.3650 | 0.6250 | 0.1700 | 0.1100 |
| holes (38).txt | 0.5325 | 0.4275 | 0.0650 | 0.0850 |
| holes (38).txt | 0.1350 | 0.7875 | 0.0500 | 0.0850 |
| holes (39).txt | 0.7300 | 0.1825 | 0.0800 | 0.0750 |
| holes (39).txt | 0.4675 | 0.6725 | 0.0650 | 0.1050 |
| holes (39).txt | 0.4400 | 0.9375 | 0.1400 | 0.1050 |
| holes (4).txt | 0.2375 | 0.4775 | 0.2350 | 0.1650 |
| holes (4).txt | 0.3975 | 0.0650 | 0.1750 | 0.1000 |
| holes (40).txt | 0.5575 | 0.3775 | 0.1050 | 0.1250 |
| holes (40).txt | 0.8475 | 0.1675 | 0.0750 | 0.0750 |
| holes (41).txt | 0.6675 | 0.4675 | 0.1450 | 0.1750 |
| holes (42).txt | 0.3425 | 0.4025 | 0.1250 | 0.1150 |
| holes (43).txt | 0.2250 | 0.7075 | 0.1700 | 0.1750 |
| holes (44).txt | 0.6300 | 0.3800 | 0.2300 | 0.1800 |
| holes (45).txt | 0.4725 | 0.2775 | 0.2150 | 0.1750 |
| holes (47).txt | 0.5550 | 0.4300 | 0.1900 | 0.1700 |
| holes (48).txt | 0.7175 | 0.5700 | 0.2450 | 0.2300 |
| holes (49).txt | 0.6100 | 0.3925 | 0.2100 | 0.2250 |
| holes (5).txt | 0.1650 | 0.5675 | 0.2200 | 0.1750 |
| holes (5).txt | 0.2575 | 0.1200 | 0.1950 | 0.1200 |
| holes (5).txt | 0.0900 | 0.1100 | 0.0800 | 0.0700 |
| holes (5).txt | 0.3350 | 0.3725 | 0.1500 | 0.1050 |
| holes (50).txt | 0.6725 | 0.1875 | 0.1450 | 0.0950 |
| holes (51).txt | 0.5025 | 0.3625 | 0.0950 | 0.0650 |
| holes (52).txt | 0.7025 | 0.5250 | 0.1850 | 0.2500 |
| holes (54).txt | 0.8400 | 0.5050 | 0.1200 | 0.1900 |
| holes (56).txt | 0.7350 | 0.5100 | 0.2200 | 0.1700 |
| holes (57).txt | 0.3050 | 0.4125 | 0.1900 | 0.1750 |
| holes (58).txt | 0.5075 | 0.4850 | 0.1850 | 0.1600 |
| holes (6).txt | 0.1200 | 0.2625 | 0.1500 | 0.1650 |
| holes (6).txt | 0.2250 | 0.7025 | 0.1700 | 0.1650 |
| holes (6).txt | 0.3300 | 0.4525 | 0.1200 | 0.1450 |
| holes (6).txt | 0.2350 | 0.3050 | 0.0700 | 0.1200 |
| holes (60).txt | 0.2500 | 0.5900 | 0.1700 | 0.2400 |
| holes (60).txt | 0.4050 | 0.8550 | 0.0900 | 0.1100 |
| holes (60).txt | 0.6750 | 0.7150 | 0.1100 | 0.1700 |
| holes (60).txt | 0.8525 | 0.7725 | 0.0950 | 0.1350 |
| holes (61).txt | 0.3475 | 0.2450 | 0.1550 | 0.1900 |
| holes (62).txt | 0.3325 | 0.2825 | 0.1650 | 0.1550 |
| holes (63).txt | 0.3425 | 0.4475 | 0.0850 | 0.1150 |
| holes (63).txt | 0.5175 | 0.2675 | 0.1850 | 0.2250 |
| holes (64).txt | 0.5275 | 0.2550 | 0.1550 | 0.1300 |
| holes (65).txt | 0.5650 | 0.6475 | 0.1600 | 0.1950 |
| holes (66).txt | 0.4475 | 0.5150 | 0.1950 | 0.1500 |
| holes (67).txt | 0.3650 | 0.3750 | 0.1700 | 0.1800 |
| holes (68).txt | 0.8100 | 0.5850 | 0.2100 | 0.2200 |
| holes (68).txt | 0.4525 | 0.9025 | 0.1650 | 0.1750 |
| holes (70).txt | 0.2425 | 0.5025 | 0.1850 | 0.1650 |
| holes (70).txt | 0.6700 | 0.5750 | 0.1500 | 0.1600 |
| holes (70).txt | 0.7000 | 0.7450 | 0.1600 | 0.1100 |
| holes (70).txt | 0.3400 | 0.8250 | 0.0900 | 0.0900 |
| holes (71).txt | 0.2925 | 0.6850 | 0.1650 | 0.1200 |
| holes (71).txt | 0.7175 | 0.6500 | 0.1250 | 0.1300 |
| holes (71).txt | 0.8400 | 0.9450 | 0.1100 | 0.1100 |
| holes (71).txt | 0.5925 | 0.6550 | 0.0950 | 0.0600 |
| holes (72).txt | 0.3525 | 0.3225 | 0.2150 | 0.1350 |
| holes (72).txt | 0.5375 | 0.2125 | 0.1250 | 0.1350 |
| holes (73).txt | 0.2825 | 0.5400 | 0.1450 | 0.1100 |
| holes (73).txt | 0.5525 | 0.5950 | 0.1050 | 0.1000 |
| holes (73).txt | 0.6025 | 0.7000 | 0.1750 | 0.1100 |
| holes (73).txt | 0.3450 | 0.7500 | 0.0900 | 0.1000 |
| holes (74).txt | 0.1850 | 0.4625 | 0.1200 | 0.1050 |
| holes (74).txt | 0.5025 | 0.4650 | 0.1550 | 0.0900 |
| holes (74).txt | 0.7525 | 0.5075 | 0.1150 | 0.0950 |
| holes (74).txt | 0.8100 | 0.6150 | 0.1100 | 0.1000 |
| holes (74).txt | 0.5875 | 0.6650 | 0.1250 | 0.1000 |
| holes (75).txt | 0.4800 | 0.8750 | 0.1100 | 0.0800 |
| holes (75).txt | 0.3875 | 0.8350 | 0.1150 | 0.0700 |
| holes (75).txt | 0.2350 | 0.8925 | 0.1200 | 0.1250 |
| holes (77).txt | 0.3025 | 0.3350 | 0.1450 | 0.0900 |
| holes (77).txt | 0.2125 | 0.3075 | 0.1050 | 0.0950 |
| holes (77).txt | 0.6575 | 0.4150 | 0.1550 | 0.1200 |
| holes (77).txt | 0.6925 | 0.5675 | 0.1450 | 0.1250 |
| holes (77).txt | 0.3825 | 0.6750 | 0.1550 | 0.1700 |
| holes (78).txt | 0.3950 | 0.3150 | 0.1500 | 0.1100 |
| holes (78).txt | 0.5700 | 0.3025 | 0.1700 | 0.1550 |
| holes (79).txt | 0.3550 | 0.2525 | 0.1100 | 0.1450 |
| holes (79).txt | 0.0750 | 0.2025 | 0.0500 | 0.1050 |
| holes (8).txt | 0.0725 | 0.6575 | 0.0950 | 0.1250 |
| holes (8).txt | 0.2225 | 0.6125 | 0.1450 | 0.1550 |
| holes (8).txt | 0.3375 | 0.6350 | 0.1250 | 0.1200 |
| holes (8).txt | 0.0300 | 0.8200 | 0.0500 | 0.0700 |
| holes (8).txt | 0.4975 | 0.8200 | 0.1550 | 0.1300 |
| holes (80).txt | 0.4150 | 0.3125 | 0.1600 | 0.1250 |
| holes (82).txt | 0.4425 | 0.3775 | 0.1950 | 0.1850 |
| holes (83).txt | 0.3200 | 0.3625 | 0.2400 | 0.1250 |
| holes (84).txt | 0.2675 | 0.2425 | 0.1650 | 0.1650 |
| holes (85).txt | 0.4300 | 0.5200 | 0.2200 | 0.2400 |
| holes (86).txt | 0.4825 | 0.6550 | 0.2050 | 0.2200 |
| holes (86).txt | 0.6925 | 0.3525 | 0.1750 | 0.1750 |
| holes (86).txt | 0.0775 | 0.1625 | 0.1450 | 0.1050 |
| holes (87).txt | 0.1550 | 0.3550 | 0.1100 | 0.1800 |
| holes (87).txt | 0.5125 | 0.8075 | 0.1850 | 0.1950 |
| holes (88).txt | 0.2450 | 0.2725 | 0.2300 | 0.1850 |
| holes (88).txt | 0.6275 | 0.1375 | 0.2250 | 0.1750 |
| holes (88).txt | 0.7125 | 0.6275 | 0.2150 | 0.2150 |
| holes (89).txt | 0.5250 | 0.7475 | 0.2000 | 0.2250 |
| holes (9).txt | 0.6025 | 0.8200 | 0.1650 | 0.1400 |
| holes (9).txt | 0.1525 | 0.8175 | 0.1150 | 0.1350 |
| holes (9).txt | 0.2550 | 0.6900 | 0.0900 | 0.1400 |
| holes (9).txt | 0.4325 | 0.7075 | 0.0950 | 0.1450 |
| holes (9).txt | 0.1725 | 0.9625 | 0.1050 | 0.0750 |
| holes (90).txt | 0.5350 | 0.4725 | 0.2900 | 0.1950 |
| holes (91).txt | 0.4550 | 0.3650 | 0.2200 | 0.2200 |
| holes (91).txt | 0.8975 | 0.6475 | 0.2050 | 0.2150 |
| holes (91).txt | 0.9625 | 0.4225 | 0.0750 | 0.1450 |
| holes (91).txt | 0.6375 | 0.6550 | 0.2950 | 0.1600 |
| holes (92).txt | 0.2250 | 0.2225 | 0.1400 | 0.2350 |
| holes (92).txt | 0.6000 | 0.6775 | 0.2400 | 0.1750 |
| holes (92).txt | 0.6750 | 0.3150 | 0.1300 | 0.0700 |
| holes (92).txt | 0.4300 | 0.3300 | 0.0800 | 0.1100 |
| holes (92).txt | 0.4625 | 0.2100 | 0.0850 | 0.0600 |
| holes (93).txt | 0.5100 | 0.4400 | 0.2200 | 0.2200 |
| holes (94).txt | 0.8175 | 0.6175 | 0.2450 | 0.2150 |
| holes (95).txt | 0.2475 | 0.3850 | 0.2150 | 0.1800 |
| holes (96).txt | 0.4825 | 0.2825 | 0.1850 | 0.2050 |
| holes (96).txt | 0.8900 | 0.4975 | 0.1400 | 0.1650 |
| holes (96).txt | 0.9675 | 0.3250 | 0.0650 | 0.1600 |
| holes (96).txt | 0.6225 | 0.4825 | 0.1050 | 0.1150 |
| holes (97).txt | 0.5500 | 0.5125 | 0.1300 | 0.1450 |
| holes (98).txt | 0.5025 | 0.5150 | 0.2850 | 0.1900 |
| holes (99).txt | 0.1175 | 0.1650 | 0.1750 | 0.0700 |
| holes (99).txt | 0.5225 | 0.4675 | 0.1950 | 0.1350 |
| holes (99).txt | 0.3800 | 0.0350 | 0.1300 | 0.0600 |
| holes (99).txt | 0.4850 | 0.0350 | 0.0500 | 0.0600 |
| holes (99).txt | 0.8750 | 0.5075 | 0.0900 | 0.0950 |
| holes (99).txt | 0.7875 | 0.6550 | 0.2150 | 0.0700 |
| incomplete(10).txt | 0.6425 | 0.5700 | 0.3050 | 0.1900 |
| incomplete(100).txt | 0.5025 | 0.4825 | 0.3950 | 0.2550 |
| incomplete(101).txt | 0.4900 | 0.4800 | 0.2900 | 0.3000 |
| incomplete(103).txt | 0.5375 | 0.5075 | 0.2150 | 0.2950 |
| incomplete(104).txt | 0.5425 | 0.5075 | 0.1850 | 0.3150 |
| incomplete(105).txt | 0.5225 | 0.4875 | 0.1250 | 0.3050 |
| incomplete(106).txt | 0.5200 | 0.5025 | 0.1800 | 0.3150 |
| incomplete(107).txt | 0.5150 | 0.4975 | 0.2100 | 0.2650 |
| incomplete(108).txt | 0.5100 | 0.5075 | 0.2200 | 0.2850 |
| incomplete(11).txt | 0.6375 | 0.6000 | 0.3050 | 0.1500 |
| incomplete(110).txt | 0.5300 | 0.5150 | 0.2600 | 0.2100 |
| incomplete(111).txt | 0.5425 | 0.5275 | 0.3450 | 0.2450 |
| incomplete(114).txt | 0.5075 | 0.4975 | 0.2350 | 0.2550 |
| incomplete(115).txt | 0.5325 | 0.5225 | 0.2650 | 0.3350 |
| incomplete(116).txt | 0.4550 | 0.5025 | 0.2200 | 0.4250 |
| incomplete(117).txt | 0.4625 | 0.4800 | 0.1850 | 0.4700 |
| incomplete(118).txt | 0.4650 | 0.5075 | 0.1900 | 0.5250 |
| incomplete(12).txt | 0.5800 | 0.6075 | 0.3200 | 0.1550 |
| incomplete(123).txt | 0.5050 | 0.4475 | 0.6100 | 0.2950 |
| incomplete(124).txt | 0.5675 | 0.4600 | 0.5750 | 0.3300 |
| incomplete(125).txt | 0.5650 | 0.4450 | 0.5700 | 0.3700 |
| incomplete(126).txt | 0.6125 | 0.4750 | 0.4450 | 0.4900 |
| incomplete(127).txt | 0.5900 | 0.4900 | 0.3000 | 0.5000 |
| incomplete(128).txt | 0.6075 | 0.4950 | 0.2150 | 0.6000 |
| incomplete(129).txt | 0.5650 | 0.5475 | 0.2000 | 0.5250 |
| incomplete(13).txt | 0.5725 | 0.6300 | 0.2550 | 0.1700 |
| incomplete(130).txt | 0.5700 | 0.5375 | 0.2200 | 0.5550 |
| incomplete(132).txt | 0.6000 | 0.5425 | 0.4200 | 0.2350 |
| incomplete(133).txt | 0.5150 | 0.5675 | 0.5200 | 0.2050 |
| incomplete(134).txt | 0.5300 | 0.5525 | 0.6700 | 0.1750 |
| incomplete(135).txt | 0.4625 | 0.5400 | 0.5550 | 0.2800 |
| incomplete(136).txt | 0.4950 | 0.5425 | 0.3700 | 0.4950 |
| incomplete(137).txt | 0.6325 | 0.3425 | 0.1650 | 0.2950 |
| incomplete(137).txt | 0.6875 | 0.6575 | 0.1550 | 0.1750 |
| incomplete(138).txt | 0.6350 | 0.3825 | 0.0900 | 0.2650 |
| incomplete(138).txt | 0.6400 | 0.6875 | 0.1200 | 0.1550 |
| incomplete(139).txt | 0.6675 | 0.4350 | 0.1150 | 0.2400 |
| incomplete(139).txt | 0.6025 | 0.7025 | 0.1450 | 0.1350 |
| incomplete(14).txt | 0.5575 | 0.6500 | 0.2450 | 0.2400 |
| incomplete(140).txt | 0.6925 | 0.4625 | 0.1750 | 0.2150 |
| incomplete(140).txt | 0.5475 | 0.7075 | 0.1850 | 0.1450 |
| incomplete(141).txt | 0.6975 | 0.5200 | 0.2250 | 0.1700 |
| incomplete(141).txt | 0.4725 | 0.7175 | 0.1350 | 0.1250 |
| incomplete(142).txt | 0.6950 | 0.5625 | 0.2000 | 0.1350 |
| incomplete(142).txt | 0.4050 | 0.6900 | 0.1400 | 0.0800 |
| incomplete(143).txt | 0.6700 | 0.6125 | 0.2800 | 0.1250 |
| incomplete(143).txt | 0.3450 | 0.6450 | 0.1300 | 0.1000 |
| incomplete(144).txt | 0.5875 | 0.6675 | 0.2450 | 0.1650 |
| incomplete(144).txt | 0.2925 | 0.5900 | 0.1950 | 0.1200 |
| incomplete(145).txt | 0.2725 | 0.4925 | 0.1250 | 0.1350 |
| incomplete(145).txt | 0.4975 | 0.6925 | 0.1650 | 0.2050 |
| incomplete(146).txt | 0.6450 | 0.4900 | 0.1900 | 0.2100 |
| incomplete(147).txt | 0.6400 | 0.4975 | 0.1400 | 0.1950 |
| incomplete(149).txt | 0.5625 | 0.3575 | 0.1950 | 0.1350 |
| incomplete(151).txt | 0.5200 | 0.3500 | 0.1400 | 0.2000 |
| incomplete(154).txt | 0.3925 | 0.5800 | 0.3250 | 0.1900 |
| incomplete(156).txt | 0.4050 | 0.5800 | 0.2300 | 0.1700 |
| incomplete(158).txt | 0.3650 | 0.5500 | 0.2200 | 0.2300 |
| incomplete(16).txt | 0.4700 | 0.6300 | 0.2100 | 0.2700 |
| incomplete(160).txt | 0.3900 | 0.4125 | 0.1000 | 0.2050 |
| incomplete(161).txt | 0.7975 | 0.3625 | 0.4050 | 0.2750 |
| incomplete(163).txt | 0.6825 | 0.1700 | 0.3350 | 0.3100 |
| incomplete(164).txt | 0.3950 | 0.2150 | 0.2600 | 0.3600 |
| incomplete(166).txt | 0.7900 | 0.4125 | 0.4200 | 0.3150 |
| incomplete(167).txt | 0.7550 | 0.4875 | 0.4500 | 0.4150 |
| incomplete(168).txt | 0.7700 | 0.7425 | 0.2200 | 0.4050 |
| incomplete(169).txt | 0.5975 | 0.6800 | 0.2350 | 0.4200 |
| incomplete(170).txt | 0.5675 | 0.5025 | 0.5650 | 0.8950 |
| incomplete(171).txt | 0.5250 | 0.3350 | 0.8300 | 0.6300 |
| incomplete(172).txt | 0.4600 | 0.3275 | 0.8400 | 0.4950 |
| incomplete(173).txt | 0.4325 | 0.3500 | 0.8150 | 0.4400 |
| incomplete(175).txt | 0.4050 | 0.5825 | 0.6500 | 0.8350 |
| incomplete(177).txt | 0.5175 | 0.6675 | 0.7950 | 0.5750 |
| incomplete(178).txt | 0.5025 | 0.6675 | 0.8150 | 0.5650 |
| incomplete(180).txt | 0.5350 | 0.7775 | 0.5600 | 0.4450 |
| incomplete(180).txt | 0.6050 | 0.1100 | 0.5900 | 0.2000 |
| incomplete(181).txt | 0.1600 | 0.3125 | 0.2700 | 0.5750 |
| incomplete(181).txt | 0.7975 | 0.5800 | 0.4050 | 0.3000 |
| incomplete(182).txt | 0.5600 | 0.7150 | 0.3200 | 0.2400 |
| incomplete(183).txt | 0.7050 | 0.7875 | 0.2100 | 0.2950 |
| incomplete(184).txt | 0.8450 | 0.5825 | 0.2200 | 0.3850 |
| incomplete(185).txt | 0.8200 | 0.4150 | 0.2500 | 0.3200 |
| incomplete(186).txt | 0.7225 | 0.2425 | 0.3550 | 0.2150 |
| incomplete(187).txt | 0.5875 | 0.1900 | 0.3650 | 0.1800 |
| incomplete(188).txt | 0.5525 | 0.1650 | 0.3450 | 0.1700 |
| incomplete(189).txt | 0.2875 | 0.2550 | 0.2150 | 0.2200 |
| incomplete(19).txt | 0.3750 | 0.5625 | 0.1400 | 0.3550 |
| incomplete(190).txt | 0.1750 | 0.4050 | 0.1800 | 0.2900 |
| incomplete(191).txt | 0.1850 | 0.6275 | 0.2600 | 0.3050 |
| incomplete(192).txt | 0.3125 | 0.7675 | 0.3150 | 0.2050 |
| incomplete(193).txt | 0.5875 | 0.8050 | 0.2550 | 0.2800 |
| incomplete(194).txt | 0.8350 | 0.6950 | 0.2300 | 0.4200 |
| incomplete(196).txt | 0.6475 | 0.4600 | 0.4050 | 0.8200 |
| incomplete(197).txt | 0.4600 | 0.8225 | 0.2600 | 0.1450 |
| incomplete(198).txt | 0.8000 | 0.8675 | 0.1900 | 0.1950 |
| incomplete(199).txt | 0.4750 | 0.6875 | 0.5600 | 0.2250 |
| incomplete(2).txt | 0.5125 | 0.3650 | 0.2750 | 0.2600 |
| incomplete(20).txt | 0.3900 | 0.4900 | 0.2300 | 0.2200 |
| incomplete(201).txt | 0.9025 | 0.5275 | 0.1950 | 0.1250 |
| incomplete(201).txt | 0.7350 | 0.7125 | 0.1200 | 0.1150 |
| incomplete(201).txt | 0.5450 | 0.8800 | 0.1400 | 0.1500 |
| incomplete(202).txt | 0.8800 | 0.3400 | 0.1300 | 0.1500 |
| incomplete(202).txt | 0.7875 | 0.6075 | 0.0950 | 0.1950 |
| incomplete(202).txt | 0.6975 | 0.8350 | 0.0950 | 0.2500 |
| incomplete(203).txt | 0.8025 | 0.4775 | 0.0750 | 0.7550 |
| incomplete(204).txt | 0.7025 | 0.1275 | 0.1250 | 0.1750 |
| incomplete(204).txt | 0.7975 | 0.3900 | 0.1050 | 0.1900 |
| incomplete(204).txt | 0.8525 | 0.6200 | 0.1150 | 0.2300 |
| incomplete(205).txt | 0.3475 | 0.1075 | 0.1550 | 0.1350 |
| incomplete(205).txt | 0.7250 | 0.2550 | 0.4000 | 0.2400 |
| incomplete(206).txt | 0.0975 | 0.4075 | 0.1550 | 0.1050 |
| incomplete(206).txt | 0.3050 | 0.2500 | 0.1500 | 0.0900 |
| incomplete(206).txt | 0.5100 | 0.1400 | 0.2300 | 0.1200 |
| incomplete(207).txt | 0.7925 | 0.2300 | 0.2850 | 0.1500 |
| incomplete(207).txt | 0.4900 | 0.3750 | 0.2000 | 0.1100 |
| incomplete(207).txt | 0.1425 | 0.6125 | 0.2050 | 0.1650 |
| incomplete(209).txt | 0.3800 | 0.4900 | 0.1300 | 0.2600 |
| incomplete(209).txt | 0.4675 | 0.8625 | 0.1850 | 0.2550 |
| incomplete(21).txt | 0.3675 | 0.4625 | 0.2750 | 0.2450 |
| incomplete(210).txt | 0.2825 | 0.5375 | 0.4950 | 0.2650 |
| incomplete(210).txt | 0.8375 | 0.7300 | 0.2750 | 0.2300 |
| incomplete(211).txt | 0.5150 | 0.3275 | 0.9400 | 0.5050 |
| incomplete(212).txt | 0.3350 | 0.4525 | 0.4900 | 0.8750 |
| incomplete(213).txt | 0.3525 | 0.5050 | 0.6050 | 0.9600 |
| incomplete(214).txt | 0.4125 | 0.6175 | 0.7850 | 0.7350 |
| incomplete(215).txt | 0.5450 | 0.6750 | 0.9100 | 0.4600 |
| incomplete(216).txt | 0.6300 | 0.6150 | 0.6000 | 0.6800 |
| incomplete(217).txt | 0.4050 | 0.5025 | 0.8000 | 0.9950 |
| incomplete(218).txt | 0.4400 | 0.5200 | 0.8500 | 0.9600 |
| incomplete(219).txt | 0.5750 | 0.4475 | 0.7700 | 0.3350 |
| incomplete(22).txt | 0.3600 | 0.4425 | 0.3000 | 0.2050 |
| incomplete(220).txt | 0.4875 | 0.4125 | 0.4750 | 0.6950 |
| incomplete(222).txt | 0.3825 | 0.5125 | 0.7350 | 0.5050 |
| incomplete(223).txt | 0.4125 | 0.5550 | 0.7250 | 0.3700 |
| incomplete(224).txt | 0.5050 | 0.6075 | 0.4700 | 0.6850 |
| incomplete(226).txt | 0.5650 | 0.5800 | 0.4700 | 0.7300 |
| incomplete(227).txt | 0.5525 | 0.5850 | 0.3450 | 0.7800 |
| incomplete(23).txt | 0.3775 | 0.4025 | 0.3250 | 0.2050 |
| incomplete(231).txt | 0.4975 | 0.5400 | 0.8550 | 0.8800 |
| incomplete(234).txt | 0.5675 | 0.1600 | 0.3750 | 0.3100 |
| incomplete(234).txt | 0.4375 | 0.6450 | 0.3050 | 0.6300 |
| incomplete(235).txt | 0.3150 | 0.1900 | 0.5200 | 0.3600 |
| incomplete(235).txt | 0.5425 | 0.6825 | 0.3650 | 0.6350 |
| incomplete(236).txt | 0.3450 | 0.2000 | 0.3700 | 0.3400 |
| incomplete(236).txt | 0.6550 | 0.6375 | 0.4600 | 0.7250 |
| incomplete(237).txt | 0.4400 | 0.4350 | 0.8700 | 0.5500 |
| incomplete(238).txt | 0.3800 | 0.5550 | 0.6000 | 0.8600 |
| incomplete(239).txt | 0.4200 | 0.5550 | 0.5800 | 0.8900 |
| incomplete(240).txt | 0.4850 | 0.4650 | 0.4900 | 0.7600 |
| incomplete(241).txt | 0.4350 | 0.4975 | 0.6700 | 0.6750 |
| incomplete(242).txt | 0.3875 | 0.5125 | 0.7350 | 0.5650 |
| incomplete(243).txt | 0.4200 | 0.5300 | 0.7000 | 0.5100 |
| incomplete(244).txt | 0.4525 | 0.5100 | 0.6550 | 0.6500 |
| incomplete(245).txt | 0.4800 | 0.5325 | 0.6200 | 0.6750 |
| incomplete(247).txt | 0.3775 | 0.4175 | 0.2650 | 0.1750 |
| incomplete(248).txt | 0.3075 | 0.4875 | 0.1650 | 0.2150 |
| incomplete(249).txt | 0.3375 | 0.5450 | 0.1450 | 0.2100 |
| incomplete(25).txt | 0.5600 | 0.4825 | 0.3800 | 0.1950 |
| incomplete(250).txt | 0.3650 | 0.5800 | 0.1900 | 0.2000 |
| incomplete(252).txt | 0.4075 | 0.6425 | 0.2150 | 0.1850 |
| incomplete(254).txt | 0.4800 | 0.6200 | 0.2700 | 0.1500 |
| incomplete(255).txt | 0.5300 | 0.6350 | 0.2500 | 0.1400 |
| incomplete(256).txt | 0.5475 | 0.6300 | 0.2150 | 0.1500 |
| incomplete(257).txt | 0.5875 | 0.6025 | 0.2450 | 0.2450 |
| incomplete(258).txt | 0.6325 | 0.5900 | 0.2050 | 0.2700 |
| incomplete(259).txt | 0.6200 | 0.5275 | 0.1600 | 0.2950 |
| incomplete(26).txt | 0.5800 | 0.5025 | 0.3600 | 0.1450 |
| incomplete(260).txt | 0.6425 | 0.4900 | 0.1750 | 0.2600 |
| incomplete(261).txt | 0.6625 | 0.4725 | 0.2550 | 0.2750 |
| incomplete(262).txt | 0.5000 | 0.3200 | 0.2000 | 0.2000 |
| incomplete(263).txt | 0.5750 | 0.5350 | 0.5100 | 0.5500 |
| incomplete(264).txt | 0.5675 | 0.5100 | 0.5350 | 0.4400 |
| incomplete(265).txt | 0.5675 | 0.4950 | 0.4650 | 0.3900 |
| incomplete(266).txt | 0.2775 | 0.5025 | 0.2150 | 0.2450 |
| incomplete(267).txt | 0.5275 | 0.6550 | 0.6850 | 0.6400 |
| incomplete(268).txt | 0.4250 | 0.6350 | 0.6500 | 0.6500 |
| incomplete(27).txt | 0.5475 | 0.4950 | 0.3050 | 0.1800 |
| incomplete(270).txt | 0.3900 | 0.4325 | 0.6100 | 0.7250 |
| incomplete(271).txt | 0.4975 | 0.3750 | 0.5250 | 0.7400 |
| incomplete(272).txt | 0.5250 | 0.3700 | 0.5700 | 0.6500 |
| incomplete(273).txt | 0.5525 | 0.3575 | 0.6750 | 0.5550 |
| incomplete(274).txt | 0.6400 | 0.4550 | 0.7100 | 0.4800 |
| incomplete(275).txt | 0.6225 | 0.5250 | 0.7050 | 0.5200 |
| incomplete(276).txt | 0.3425 | 0.6975 | 0.3050 | 0.3650 |
| incomplete(277).txt | 0.2450 | 0.5200 | 0.2400 | 0.3500 |
| incomplete(278).txt | 0.3025 | 0.3750 | 0.2450 | 0.2700 |
| incomplete(279).txt | 0.3175 | 0.3325 | 0.4150 | 0.5450 |
| incomplete(279).txt | 0.5325 | 0.8375 | 0.2150 | 0.2250 |
| incomplete(28).txt | 0.5625 | 0.5050 | 0.3050 | 0.2200 |
| incomplete(281).txt | 0.4700 | 0.4800 | 0.3100 | 0.3100 |
| incomplete(282).txt | 0.5275 | 0.4775 | 0.1650 | 0.3350 |
| incomplete(283).txt | 0.4400 | 0.3400 | 0.3400 | 0.2300 |
| incomplete(284).txt | 0.5900 | 0.4075 | 0.5900 | 0.4050 |
| incomplete(285).txt | 0.5275 | 0.4450 | 0.8150 | 0.2700 |
| incomplete(286).txt | 0.5075 | 0.4850 | 0.6050 | 0.4900 |
| incomplete(287).txt | 0.7475 | 0.4450 | 0.3750 | 0.2500 |
| incomplete(288).txt | 0.7275 | 0.4100 | 0.4550 | 0.3100 |
| incomplete(289).txt | 0.7150 | 0.4900 | 0.4300 | 0.3300 |
| incomplete(290).txt | 0.5025 | 0.4375 | 0.9950 | 0.2550 |
| incomplete(291).txt | 0.9100 | 0.2225 | 0.1800 | 0.2450 |
| incomplete(291).txt | 0.7425 | 0.3125 | 0.1650 | 0.2350 |
| incomplete(291).txt | 0.5825 | 0.4025 | 0.1550 | 0.2350 |
| incomplete(291).txt | 0.4300 | 0.4700 | 0.1500 | 0.2200 |
| incomplete(291).txt | 0.2900 | 0.5325 | 0.1200 | 0.2250 |
| incomplete(291).txt | 0.1275 | 0.6250 | 0.2350 | 0.2100 |
| incomplete(292).txt | 0.4300 | 0.5050 | 0.2200 | 0.9900 |
| incomplete(293).txt | 0.2000 | 0.2475 | 0.3900 | 0.4850 |
| incomplete(293).txt | 0.5650 | 0.5600 | 0.4000 | 0.4500 |
| incomplete(293).txt | 0.8375 | 0.8325 | 0.2450 | 0.3350 |
| incomplete(294).txt | 0.5025 | 0.5275 | 0.9950 | 0.3450 |
| incomplete(295).txt | 0.4225 | 0.3375 | 0.4650 | 0.5350 |
| incomplete(295).txt | 0.8350 | 0.6375 | 0.2200 | 0.3350 |
| incomplete(297).txt | 0.7925 | 0.6075 | 0.3250 | 0.4050 |
| incomplete(299).txt | 0.6725 | 0.6725 | 0.2450 | 0.2950 |
| incomplete(3).txt | 0.5400 | 0.3600 | 0.2500 | 0.3000 |
| incomplete(30).txt | 0.5400 | 0.5175 | 0.1900 | 0.1950 |
| incomplete(31).txt | 0.5325 | 0.5275 | 0.2050 | 0.2450 |
| incomplete(33).txt | 0.5200 | 0.5425 | 0.0900 | 0.2550 |
| incomplete(35).txt | 0.4925 | 0.5450 | 0.2350 | 0.2000 |
| incomplete(37).txt | 0.4700 | 0.5250 | 0.3000 | 0.1600 |
| incomplete(38).txt | 0.4625 | 0.5150 | 0.2650 | 0.1500 |
| incomplete(39).txt | 0.4575 | 0.4800 | 0.2350 | 0.1900 |
| incomplete(40).txt | 0.4525 | 0.4550 | 0.1750 | 0.2000 |
| incomplete(41).txt | 0.4825 | 0.4775 | 0.2250 | 0.2450 |
| incomplete(42).txt | 0.4825 | 0.4325 | 0.1550 | 0.2850 |
| incomplete(43).txt | 0.5200 | 0.4350 | 0.1400 | 0.2500 |
| incomplete(44).txt | 0.5200 | 0.4350 | 0.1500 | 0.2400 |
| incomplete(45).txt | 0.5375 | 0.4500 | 0.2150 | 0.1600 |
| incomplete(46).txt | 0.5450 | 0.4550 | 0.2400 | 0.1400 |
| incomplete(47).txt | 0.5500 | 0.4875 | 0.3100 | 0.2150 |
| incomplete(48).txt | 0.5600 | 0.5125 | 0.2600 | 0.2250 |
| incomplete(49).txt | 0.5025 | 0.4775 | 0.1850 | 0.2250 |
| incomplete(51).txt | 0.6600 | 0.6500 | 0.3200 | 0.5200 |
| incomplete(54).txt | 0.4425 | 0.6700 | 0.4650 | 0.3300 |
| incomplete(55).txt | 0.4000 | 0.6200 | 0.5600 | 0.2600 |
| incomplete(58).txt | 0.3300 | 0.5825 | 0.4700 | 0.2250 |
| incomplete(6).txt | 0.6250 | 0.4100 | 0.2100 | 0.3800 |
| incomplete(62).txt | 0.3600 | 0.3775 | 0.2900 | 0.4650 |
| incomplete(64).txt | 0.4850 | 0.2800 | 0.2100 | 0.4500 |
| incomplete(66).txt | 0.6200 | 0.3200 | 0.4900 | 0.2200 |
| incomplete(67).txt | 0.7125 | 0.4300 | 0.5450 | 0.2600 |
| incomplete(68).txt | 0.7300 | 0.5150 | 0.4600 | 0.3500 |
| incomplete(7).txt | 0.6725 | 0.4650 | 0.1650 | 0.3100 |
| incomplete(71).txt | 0.5200 | 0.4825 | 0.9500 | 0.7650 |
| incomplete(72).txt | 0.5275 | 0.4950 | 0.9450 | 0.8900 |
| incomplete(73).txt | 0.5700 | 0.4800 | 0.8600 | 0.8400 |
| incomplete(74).txt | 0.5850 | 0.5300 | 0.8200 | 0.9100 |
| incomplete(75).txt | 0.6025 | 0.5150 | 0.7450 | 0.9500 |
| incomplete(76).txt | 0.6050 | 0.5025 | 0.7900 | 0.9450 |
| incomplete(77).txt | 0.6125 | 0.5025 | 0.7550 | 0.9950 |
| incomplete(79).txt | 0.5550 | 0.5050 | 0.6900 | 0.9100 |
| incomplete(8).txt | 0.6750 | 0.5175 | 0.2300 | 0.2050 |
| incomplete(80).txt | 0.4975 | 0.5575 | 0.9250 | 0.7750 |
| incomplete(81).txt | 0.5000 | 0.5525 | 0.9800 | 0.8250 |
| incomplete(83).txt | 0.4925 | 0.5000 | 0.9450 | 0.9400 |
| incomplete(85).txt | 0.4225 | 0.5125 | 0.8350 | 0.9650 |
| incomplete(86).txt | 0.4375 | 0.5025 | 0.8150 | 0.9750 |
| incomplete(88).txt | 0.4975 | 0.4825 | 0.7950 | 0.9450 |
| incomplete(89).txt | 0.4800 | 0.4700 | 0.8200 | 0.9300 |
| incomplete(9).txt | 0.6275 | 0.5575 | 0.3150 | 0.1750 |
| incomplete(90).txt | 0.4975 | 0.4225 | 0.9850 | 0.8050 |
| incomplete(92).txt | 0.5050 | 0.4500 | 0.9900 | 0.7500 |
| incomplete(93).txt | 0.4900 | 0.4925 | 0.2400 | 0.3350 |
| incomplete(94).txt | 0.5125 | 0.4775 | 0.1550 | 0.2950 |
| incomplete(95).txt | 0.4775 | 0.4850 | 0.2450 | 0.3100 |
| incomplete(96).txt | 0.4750 | 0.4825 | 0.2300 | 0.2550 |
| incomplete(97).txt | 0.5125 | 0.5275 | 0.3150 | 0.2050 |
| incomplete(98).txt | 0.5075 | 0.5050 | 0.3150 | 0.2200 |
| incomplete(99).txt | 0.5125 | 0.4700 | 0.3050 | 0.2200 |
| mineralization (1).txt | 0.5500 | 0.5075 | 0.9000 | 0.8150 |
| mineralization (1).txt | 0.5850 | 0.4450 | 0.8100 | 0.7800 |
| mineralization (100).txt | 0.5025 | 0.4975 | 0.9850 | 0.9850 |
| mineralization (103).txt | 0.4950 | 0.4700 | 0.9600 | 0.9200 |
| mineralization (104).txt | 0.5175 | 0.4950 | 0.9650 | 0.9800 |
| mineralization (105).txt | 0.5050 | 0.5050 | 0.9800 | 0.9900 |
| mineralization (106).txt | 0.4975 | 0.4825 | 0.9850 | 0.9550 |
| mineralization (108).txt | 0.7575 | 0.3625 | 0.4850 | 0.7150 |
| mineralization (109).txt | 0.5075 | 0.5050 | 0.9850 | 0.9900 |
| mineralization (110).txt | 0.5075 | 0.5050 | 0.9850 | 0.9900 |
| mineralization (111).txt | 0.5050 | 0.5100 | 0.9900 | 0.9800 |
| mineralization (112).txt | 0.5025 | 0.5025 | 0.9950 | 0.9950 |
| mineralization (113).txt | 0.5025 | 0.4825 | 0.9950 | 0.9550 |
| mineralization (115).txt | 0.4925 | 0.4875 | 0.9550 | 0.9350 |
| mineralization (116).txt | 0.5025 | 0.5050 | 0.9750 | 0.9900 |
| mineralization (117).txt | 0.5050 | 0.5000 | 0.9900 | 0.9900 |
| mineralization (118).txt | 0.4925 | 0.5000 | 0.9650 | 0.9800 |
| mineralization (121).txt | 0.4975 | 0.5050 | 0.9750 | 0.9900 |
| mineralization (122).txt | 0.4900 | 0.5050 | 0.9600 | 0.9900 |
| mineralization (123).txt | 0.5025 | 0.5050 | 0.9750 | 0.9900 |
| mineralization (126).txt | 0.5050 | 0.4975 | 0.9900 | 0.9850 |
| mineralization (127).txt | 0.5050 | 0.5050 | 0.9900 | 0.9800 |
| mineralization (128).txt | 0.5050 | 0.5075 | 0.9900 | 0.9850 |
| mineralization (129).txt | 0.5025 | 0.5050 | 0.9750 | 0.9900 |
| mineralization (13).txt | 0.5150 | 0.4950 | 0.8800 | 0.9600 |
| mineralization (130).txt | 0.5125 | 0.5075 | 0.9750 | 0.9850 |
| mineralization (131).txt | 0.5050 | 0.5050 | 0.9900 | 0.9800 |
| mineralization (132).txt | 0.5050 | 0.4975 | 0.9800 | 0.9750 |
| mineralization (133).txt | 0.5050 | 0.5025 | 0.9900 | 0.9950 |
| mineralization (134).txt | 0.4875 | 0.5025 | 0.9550 | 0.9950 |
| mineralization (135).txt | 0.5025 | 0.5075 | 0.9950 | 0.9850 |
| mineralization (136).txt | 0.5025 | 0.5025 | 0.9950 | 0.9950 |
| mineralization (137).txt | 0.4925 | 0.5050 | 0.9550 | 0.9900 |
| mineralization (138).txt | 0.5125 | 0.4950 | 0.9750 | 0.9800 |
| mineralization (139).txt | 0.5050 | 0.5000 | 0.9900 | 0.9800 |
| mineralization (14).txt | 0.4750 | 0.5750 | 0.7900 | 0.8500 |
| mineralization (140).txt | 0.5050 | 0.5050 | 0.9900 | 0.9900 |
| mineralization (141).txt | 0.4800 | 0.5025 | 0.9500 | 0.9950 |
| mineralization (142).txt | 0.5100 | 0.5025 | 0.9800 | 0.9950 |
| mineralization (144).txt | 0.5075 | 0.5050 | 0.9750 | 0.9900 |
| mineralization (145).txt | 0.5025 | 0.4850 | 0.9750 | 0.9500 |
| mineralization (146).txt | 0.4925 | 0.5025 | 0.9550 | 0.9950 |
| mineralization (147).txt | 0.5100 | 0.5100 | 0.9800 | 0.9800 |
| mineralization (148).txt | 0.5000 | 0.5000 | 0.9700 | 0.9700 |
| mineralization (15).txt | 0.4825 | 0.5125 | 0.9350 | 0.9150 |
| mineralization (151).txt | 0.5050 | 0.5075 | 0.9700 | 0.9850 |
| mineralization (152).txt | 0.5100 | 0.5025 | 0.9800 | 0.9950 |
| mineralization (153).txt | 0.5075 | 0.5125 | 0.9850 | 0.9750 |
| mineralization (154).txt | 0.4925 | 0.5050 | 0.9350 | 0.9900 |
| mineralization (155).txt | 0.5050 | 0.5075 | 0.9900 | 0.9850 |
| mineralization (156).txt | 0.5050 | 0.5100 | 0.9900 | 0.9800 |
| mineralization (157).txt | 0.5100 | 0.5075 | 0.9800 | 0.9850 |
| mineralization (158).txt | 0.4925 | 0.5075 | 0.9650 | 0.9850 |
| mineralization (159).txt | 0.4900 | 0.4800 | 0.9400 | 0.9400 |
| mineralization (16).txt | 0.4950 | 0.5225 | 0.8800 | 0.9050 |
| mineralization (160).txt | 0.5000 | 0.5100 | 0.9400 | 0.9800 |
| mineralization (161).txt | 0.5050 | 0.4925 | 0.9900 | 0.9550 |
| mineralization (162).txt | 0.5075 | 0.5100 | 0.9850 | 0.9800 |
| mineralization (163).txt | 0.5125 | 0.5025 | 0.9750 | 0.9950 |
| mineralization (164).txt | 0.5075 | 0.5100 | 0.9850 | 0.9800 |
| mineralization (165).txt | 0.5200 | 0.5100 | 0.9600 | 0.9800 |
| mineralization (166).txt | 0.5125 | 0.4925 | 0.9450 | 0.9450 |
| mineralization (168).txt | 0.5050 | 0.5025 | 0.9900 | 0.9950 |
| mineralization (169).txt | 0.5175 | 0.5000 | 0.9350 | 0.9500 |
| mineralization (17).txt | 0.4850 | 0.5375 | 0.8600 | 0.8850 |
| mineralization (170).txt | 0.5000 | 0.5025 | 0.9600 | 0.9650 |
| mineralization (171).txt | 0.4975 | 0.4950 | 0.8850 | 0.9400 |
| mineralization (173).txt | 0.5075 | 0.4575 | 0.9650 | 0.9050 |
| mineralization (175).txt | 0.5050 | 0.4875 | 0.9800 | 0.9550 |
| mineralization (176).txt | 0.4950 | 0.4900 | 0.9600 | 0.9500 |
| mineralization (178).txt | 0.4975 | 0.5025 | 0.9650 | 0.9750 |
| mineralization (180).txt | 0.5025 | 0.4825 | 0.9650 | 0.9450 |
| mineralization (181).txt | 0.4900 | 0.5075 | 0.9600 | 0.9850 |
| mineralization (182).txt | 0.4900 | 0.4850 | 0.9300 | 0.9400 |
| mineralization (183).txt | 0.4975 | 0.4875 | 0.9650 | 0.9650 |
| mineralization (184).txt | 0.5125 | 0.4950 | 0.9750 | 0.9600 |
| mineralization (186).txt | 0.4950 | 0.4975 | 0.9500 | 0.9750 |
| mineralization (187).txt | 0.4975 | 0.5000 | 0.9450 | 0.9800 |
| mineralization (188).txt | 0.5025 | 0.5025 | 0.9950 | 0.9950 |
| mineralization (189).txt | 0.4975 | 0.5000 | 0.9650 | 0.9600 |
| mineralization (19).txt | 0.5150 | 0.4925 | 0.9700 | 0.8850 |
| mineralization (190).txt | 0.5100 | 0.4975 | 0.9800 | 0.9650 |
| mineralization (191).txt | 0.5025 | 0.5050 | 0.9650 | 0.9900 |
| mineralization (193).txt | 0.5125 | 0.5025 | 0.9750 | 0.9650 |
| mineralization (194).txt | 0.5100 | 0.5050 | 0.9700 | 0.9900 |
| mineralization (195).txt | 0.4900 | 0.5050 | 0.9600 | 0.9800 |
| mineralization (196).txt | 0.4850 | 0.5025 | 0.9600 | 0.9950 |
| mineralization (197).txt | 0.5100 | 0.5050 | 0.9800 | 0.9900 |
| mineralization (198).txt | 0.5000 | 0.5025 | 0.9800 | 0.9950 |
| mineralization (199).txt | 0.5050 | 0.5025 | 0.9900 | 0.9950 |
| mineralization (2).txt | 0.6900 | 0.5425 | 0.5500 | 0.6850 |
| mineralization (20).txt | 0.5025 | 0.5075 | 0.8950 | 0.9350 |
| mineralization (201).txt | 0.5025 | 0.5025 | 0.9950 | 0.9750 |
| mineralization (202).txt | 0.5000 | 0.5050 | 0.9400 | 0.9900 |
| mineralization (203).txt | 0.5125 | 0.5050 | 0.9750 | 0.9800 |
| mineralization (204).txt | 0.5125 | 0.4975 | 0.9750 | 0.9750 |
| mineralization (205).txt | 0.5075 | 0.4950 | 0.9850 | 0.9800 |
| mineralization (207).txt | 0.5000 | 0.5050 | 0.9300 | 0.9800 |
| mineralization (208).txt | 0.4975 | 0.4975 | 0.9350 | 0.9850 |
| mineralization (21).txt | 0.5025 | 0.5175 | 0.9150 | 0.9150 |
| mineralization (211).txt | 0.5025 | 0.5075 | 0.9650 | 0.9850 |
| mineralization (212).txt | 0.5225 | 0.5025 | 0.9550 | 0.9950 |
| mineralization (213).txt | 0.5050 | 0.5075 | 0.9900 | 0.9850 |
| mineralization (214).txt | 0.5150 | 0.5050 | 0.9700 | 0.9900 |
| mineralization (215).txt | 0.5125 | 0.5025 | 0.9750 | 0.9950 |
| mineralization (217).txt | 0.5050 | 0.5050 | 0.9900 | 0.9900 |
| mineralization (218).txt | 0.5000 | 0.5025 | 0.9600 | 0.9950 |
| mineralization (219).txt | 0.5025 | 0.5050 | 0.9850 | 0.9900 |
| mineralization (22).txt | 0.5050 | 0.4900 | 0.9300 | 0.9100 |
| mineralization (221).txt | 0.4975 | 0.5025 | 0.9450 | 0.9950 |
| mineralization (222).txt | 0.5025 | 0.5025 | 0.9950 | 0.9950 |
| mineralization (223).txt | 0.5100 | 0.4825 | 0.9800 | 0.9550 |
| mineralization (224).txt | 0.5200 | 0.5100 | 0.9600 | 0.9800 |
| mineralization (225).txt | 0.4600 | 0.5050 | 0.8300 | 0.9900 |
| mineralization (226).txt | 0.4650 | 0.5125 | 0.8400 | 0.9750 |
| mineralization (227).txt | 0.5025 | 0.5075 | 0.9950 | 0.9850 |
| mineralization (228).txt | 0.5200 | 0.5100 | 0.9600 | 0.9800 |
| mineralization (229).txt | 0.5200 | 0.5100 | 0.9600 | 0.9800 |
| mineralization (230).txt | 0.5025 | 0.5075 | 0.9950 | 0.9850 |
| mineralization (231).txt | 0.5075 | 0.5025 | 0.9850 | 0.9950 |
| mineralization (232).txt | 0.4975 | 0.4950 | 0.9750 | 0.9600 |
| mineralization (233).txt | 0.5050 | 0.5075 | 0.9300 | 0.9850 |
| mineralization (234).txt | 0.4875 | 0.5050 | 0.9250 | 0.9900 |
| mineralization (235).txt | 0.4950 | 0.5050 | 0.9700 | 0.9900 |
| mineralization (237).txt | 0.5075 | 0.5075 | 0.9850 | 0.9850 |
| mineralization (238).txt | 0.4950 | 0.5025 | 0.9500 | 0.9950 |
| mineralization (239).txt | 0.5125 | 0.5075 | 0.9750 | 0.9850 |
| mineralization (24).txt | 0.4975 | 0.5125 | 0.9150 | 0.9350 |
| mineralization (241).txt | 0.5025 | 0.5050 | 0.9950 | 0.9900 |
| mineralization (242).txt | 0.5050 | 0.5100 | 0.9900 | 0.9800 |
| mineralization (243).txt | 0.5050 | 0.5100 | 0.9900 | 0.9800 |
| mineralization (244).txt | 0.5125 | 0.5050 | 0.9750 | 0.9700 |
| mineralization (245).txt | 0.5050 | 0.5025 | 0.9800 | 0.9950 |
| mineralization (246).txt | 0.5025 | 0.5025 | 0.9750 | 0.9950 |
| mineralization (249).txt | 0.5100 | 0.4475 | 0.9800 | 0.8650 |
| mineralization (25).txt | 0.4625 | 0.4825 | 0.9050 | 0.9050 |
| mineralization (251).txt | 0.4925 | 0.5075 | 0.9650 | 0.9850 |
| mineralization (252).txt | 0.5050 | 0.4950 | 0.9400 | 0.9500 |
| mineralization (253).txt | 0.5075 | 0.5025 | 0.9650 | 0.9550 |
| mineralization (254).txt | 0.5025 | 0.5100 | 0.9950 | 0.9800 |
| mineralization (255).txt | 0.5050 | 0.5125 | 0.9900 | 0.9750 |
| mineralization (256).txt | 0.4850 | 0.5100 | 0.9400 | 0.9800 |
| mineralization (257).txt | 0.5150 | 0.5100 | 0.9700 | 0.9800 |
| mineralization (258).txt | 0.5100 | 0.5050 | 0.9800 | 0.9900 |
| mineralization (259).txt | 0.5050 | 0.5025 | 0.9900 | 0.9950 |
| mineralization (26).txt | 0.5100 | 0.4850 | 0.9300 | 0.9000 |
| mineralization (261).txt | 0.5225 | 0.5100 | 0.9550 | 0.9800 |
| mineralization (262).txt | 0.4950 | 0.5175 | 0.9300 | 0.9650 |
| mineralization (264).txt | 0.5075 | 0.5050 | 0.9850 | 0.9900 |
| mineralization (265).txt | 0.5025 | 0.5075 | 0.9950 | 0.9850 |
| mineralization (267).txt | 0.5000 | 0.5100 | 0.9800 | 0.9800 |
| mineralization (268).txt | 0.5050 | 0.5100 | 0.9600 | 0.9800 |
| mineralization (269).txt | 0.5100 | 0.4975 | 0.9800 | 0.9550 |
| mineralization (27).txt | 0.5200 | 0.4550 | 0.9400 | 0.8100 |
| mineralization (270).txt | 0.5150 | 0.5025 | 0.9700 | 0.9550 |
| mineralization (271).txt | 0.5125 | 0.5075 | 0.9750 | 0.9750 |
| mineralization (272).txt | 0.5100 | 0.5050 | 0.9800 | 0.9900 |
| mineralization (273).txt | 0.5025 | 0.5100 | 0.9950 | 0.9800 |
| mineralization (274).txt | 0.5025 | 0.5050 | 0.9950 | 0.9900 |
| mineralization (278).txt | 0.5050 | 0.5075 | 0.9900 | 0.9750 |
| mineralization (279).txt | 0.5125 | 0.4675 | 0.9750 | 0.9150 |
| mineralization (28).txt | 0.5225 | 0.3575 | 0.9550 | 0.6150 |
| mineralization (281).txt | 0.5050 | 0.4600 | 0.9900 | 0.9100 |
| mineralization (282).txt | 0.4950 | 0.4875 | 0.9600 | 0.9550 |
| mineralization (283).txt | 0.5100 | 0.5075 | 0.9800 | 0.9850 |
| mineralization (285).txt | 0.4950 | 0.5100 | 0.9500 | 0.9800 |
| mineralization (286).txt | 0.5125 | 0.4975 | 0.9750 | 0.9750 |
| mineralization (287).txt | 0.5125 | 0.5075 | 0.9650 | 0.9850 |
| mineralization (288).txt | 0.5125 | 0.5075 | 0.9750 | 0.9850 |
| mineralization (289).txt | 0.5050 | 0.5050 | 0.9900 | 0.9800 |
| mineralization (29).txt | 0.5250 | 0.4925 | 0.9500 | 0.9150 |
| mineralization (290).txt | 0.5075 | 0.5050 | 0.9850 | 0.9900 |
| mineralization (292).txt | 0.5100 | 0.5100 | 0.9800 | 0.9800 |
| mineralization (293).txt | 0.5100 | 0.5100 | 0.9800 | 0.9800 |
| mineralization (294).txt | 0.5200 | 0.5100 | 0.9600 | 0.9800 |
| mineralization (295).txt | 0.5125 | 0.5100 | 0.9750 | 0.9800 |
| mineralization (297).txt | 0.4950 | 0.5050 | 0.9500 | 0.9800 |
| mineralization (297).txt | 0.6875 | 0.5525 | 0.6250 | 0.8950 |
| mineralization (298).txt | 0.5050 | 0.4725 | 0.9000 | 0.8550 |
| mineralization (299).txt | 0.4900 | 0.4975 | 0.9100 | 0.9350 |
| mineralization (3).txt | 0.5500 | 0.2975 | 0.9000 | 0.5250 |
| mineralization (30).txt | 0.5100 | 0.4800 | 0.9800 | 0.8700 |
| mineralization (300).txt | 0.5025 | 0.5125 | 0.9450 | 0.9750 |
| mineralization (31).txt | 0.5150 | 0.4575 | 0.9500 | 0.8450 |
| mineralization (32).txt | 0.5100 | 0.5250 | 0.9100 | 0.9400 |
| mineralization (33).txt | 0.4900 | 0.4925 | 0.9000 | 0.9050 |
| mineralization (34).txt | 0.4725 | 0.5000 | 0.8850 | 0.9200 |
| mineralization (37).txt | 0.4900 | 0.5100 | 0.8400 | 0.9400 |
| mineralization (38).txt | 0.4525 | 0.5000 | 0.7950 | 0.9000 |
| mineralization (40).txt | 0.5475 | 0.4775 | 0.9050 | 0.8950 |
| mineralization (43).txt | 0.5375 | 0.5250 | 0.9150 | 0.9500 |
| mineralization (45).txt | 0.5025 | 0.4550 | 0.9750 | 0.8800 |
| mineralization (46).txt | 0.5325 | 0.4975 | 0.9350 | 0.9150 |
| mineralization (47).txt | 0.5250 | 0.5125 | 0.9500 | 0.9350 |
| mineralization (48).txt | 0.5325 | 0.5200 | 0.9350 | 0.9600 |
| mineralization (49).txt | 0.5275 | 0.5250 | 0.9450 | 0.9500 |
| mineralization (5).txt | 0.5525 | 0.5075 | 0.7750 | 0.8850 |
| mineralization (50).txt | 0.4975 | 0.4850 | 0.8550 | 0.8800 |
| mineralization (51).txt | 0.5250 | 0.4825 | 0.9500 | 0.8850 |
| mineralization (53).txt | 0.4900 | 0.5025 | 0.8900 | 0.9950 |
| mineralization (54).txt | 0.4750 | 0.4750 | 0.9400 | 0.9100 |
| mineralization (55).txt | 0.5050 | 0.5050 | 0.9900 | 0.9900 |
| mineralization (56).txt | 0.4975 | 0.4800 | 0.8950 | 0.9200 |
| mineralization (57).txt | 0.5175 | 0.5000 | 0.9550 | 0.9900 |
| mineralization (58).txt | 0.4775 | 0.5100 | 0.8950 | 0.9800 |
| mineralization (59).txt | 0.5075 | 0.5025 | 0.9850 | 0.9750 |
| mineralization (6).txt | 0.5125 | 0.3925 | 0.9550 | 0.6050 |
| mineralization (60).txt | 0.5025 | 0.4925 | 0.9950 | 0.9350 |
| mineralization (61).txt | 0.5200 | 0.5050 | 0.9600 | 0.9800 |
| mineralization (62).txt | 0.5175 | 0.5025 | 0.9650 | 0.9950 |
| mineralization (63).txt | 0.5025 | 0.4775 | 0.9250 | 0.9150 |
| mineralization (65).txt | 0.5700 | 0.2125 | 0.6200 | 0.3950 |
| mineralization (65).txt | 0.2375 | 0.8250 | 0.2550 | 0.2700 |
| mineralization (65).txt | 0.8075 | 0.7100 | 0.3850 | 0.5100 |
| mineralization (66).txt | 0.5575 | 0.6225 | 0.8850 | 0.7150 |
| mineralization (66).txt | 0.6900 | 0.1275 | 0.6200 | 0.2450 |
| mineralization (67).txt | 0.5050 | 0.4575 | 0.8000 | 0.5250 |
| mineralization (68).txt | 0.5075 | 0.3950 | 0.8250 | 0.5400 |
| mineralization (69).txt | 0.6075 | 0.2350 | 0.6250 | 0.4000 |
| mineralization (69).txt | 0.1550 | 0.8100 | 0.2900 | 0.2800 |
| mineralization (69).txt | 0.8575 | 0.8925 | 0.2850 | 0.2150 |
| mineralization (7).txt | 0.4950 | 0.4900 | 0.8800 | 0.9000 |
| mineralization (70).txt | 0.5700 | 0.5825 | 0.6200 | 0.5850 |
| mineralization (71).txt | 0.3475 | 0.4975 | 0.4250 | 0.3650 |
| mineralization (71).txt | 0.6275 | 0.2175 | 0.6150 | 0.2750 |
| mineralization (71).txt | 0.8875 | 0.5900 | 0.2250 | 0.4100 |
| mineralization (71).txt | 0.0975 | 0.7850 | 0.1750 | 0.2100 |
| mineralization (71).txt | 0.1800 | 0.1850 | 0.3000 | 0.3600 |
| mineralization (72).txt | 0.2525 | 0.3175 | 0.4850 | 0.3450 |
| mineralization (72).txt | 0.8050 | 0.8050 | 0.3900 | 0.3100 |
| mineralization (72).txt | 0.1300 | 0.7675 | 0.2500 | 0.4550 |
| mineralization (73).txt | 0.3800 | 0.3950 | 0.5000 | 0.5100 |
| mineralization (73).txt | 0.8575 | 0.2950 | 0.2850 | 0.1900 |
| mineralization (73).txt | 0.5250 | 0.0625 | 0.1900 | 0.1050 |
| mineralization (74).txt | 0.1350 | 0.3525 | 0.2600 | 0.2450 |
| mineralization (74).txt | 0.1675 | 0.6900 | 0.3150 | 0.2900 |
| mineralization (74).txt | 0.6925 | 0.6350 | 0.4050 | 0.4100 |
| mineralization (74).txt | 0.8925 | 0.3200 | 0.1250 | 0.1300 |
| mineralization (75).txt | 0.1625 | 0.1950 | 0.3150 | 0.3100 |
| mineralization (75).txt | 0.8325 | 0.3500 | 0.3350 | 0.2600 |
| mineralization (75).txt | 0.6825 | 0.0850 | 0.5050 | 0.1600 |
| mineralization (75).txt | 0.4450 | 0.8450 | 0.5200 | 0.3100 |
| mineralization (76).txt | 0.1150 | 0.1775 | 0.2000 | 0.1850 |
| mineralization (76).txt | 0.1600 | 0.3975 | 0.2400 | 0.1550 |
| mineralization (76).txt | 0.5225 | 0.3625 | 0.2850 | 0.2550 |
| mineralization (76).txt | 0.4325 | 0.7900 | 0.1050 | 0.1300 |
| mineralization (76).txt | 0.8175 | 0.8750 | 0.1950 | 0.2500 |
| mineralization (76).txt | 0.8200 | 0.6000 | 0.2800 | 0.1600 |
| mineralization (76).txt | 0.9325 | 0.0550 | 0.1350 | 0.1000 |
| mineralization (76).txt | 0.6575 | 0.1625 | 0.1450 | 0.1250 |
| mineralization (76).txt | 0.9350 | 0.2700 | 0.1300 | 0.1600 |
| mineralization (77).txt | 0.1450 | 0.3025 | 0.2600 | 0.2150 |
| mineralization (77).txt | 0.2050 | 0.5575 | 0.2600 | 0.1750 |
| mineralization (77).txt | 0.6225 | 0.5450 | 0.3250 | 0.3000 |
| mineralization (77).txt | 0.8300 | 0.3175 | 0.1900 | 0.1450 |
| mineralization (77).txt | 0.9325 | 0.7750 | 0.1250 | 0.3100 |
| mineralization (78).txt | 0.5800 | 0.3775 | 0.7500 | 0.6950 |
| mineralization (79).txt | 0.5800 | 0.4925 | 0.7500 | 0.9750 |
| mineralization (8).txt | 0.5075 | 0.4175 | 0.9250 | 0.8150 |
| mineralization (80).txt | 0.5075 | 0.5050 | 0.9550 | 0.9700 |
| mineralization (81).txt | 0.4975 | 0.5075 | 0.9650 | 0.9850 |
| mineralization (82).txt | 0.5025 | 0.5025 | 0.9850 | 0.9750 |
| mineralization (83).txt | 0.4950 | 0.4750 | 0.9800 | 0.9400 |
| mineralization (84).txt | 0.4950 | 0.4975 | 0.9700 | 0.9750 |
| mineralization (85).txt | 0.5050 | 0.5075 | 0.9900 | 0.9850 |
| mineralization (86).txt | 0.5000 | 0.5025 | 0.9800 | 0.9950 |
| mineralization (87).txt | 0.5125 | 0.5000 | 0.9750 | 0.9800 |
| mineralization (88).txt | 0.4975 | 0.4975 | 0.9650 | 0.9850 |
| mineralization (89).txt | 0.5050 | 0.4900 | 0.9900 | 0.9600 |
| mineralization (9).txt | 0.4725 | 0.3925 | 0.8450 | 0.6750 |
| mineralization (90).txt | 0.5050 | 0.4950 | 0.9900 | 0.9700 |
| mineralization (92).txt | 0.5050 | 0.4325 | 0.9900 | 0.8150 |
| mineralization (94).txt | 0.5050 | 0.4850 | 0.9900 | 0.9500 |
| mineralization (95).txt | 0.5075 | 0.5000 | 0.9850 | 0.9800 |
| mineralization (96).txt | 0.5025 | 0.5025 | 0.9950 | 0.9950 |
| mineralization (97).txt | 0.4825 | 0.4925 | 0.9450 | 0.9550 |
| mineralization (98).txt | 0.5575 | 0.5025 | 0.8850 | 0.9950 |

**Table S2. The label information corresponding to the validation set images**

| Picture | x | y | w | h |
| --- | --- | --- | --- | --- |
| cracking(1).txt | 0.4600 | 0.5025 | 0.5100 | 0.9950 |
| cracking(10).txt | 0.4500 | 0.5875 | 0.8900 | 0.1450 |
| cracking(109).txt | 0.5025 | 0.4100 | 0.9950 | 0.5300 |
| cracking(121).txt | 0.5025 | 0.5450 | 0.9950 | 0.2100 |
| cracking(125).txt | 0.4400 | 0.5025 | 0.1900 | 0.9950 |
| cracking(133).txt | 0.5075 | 0.5625 | 0.8850 | 0.2450 |
| cracking(137).txt | 0.4325 | 0.5000 | 0.3350 | 0.9100 |
| cracking(139).txt | 0.4375 | 0.5025 | 0.5150 | 0.9950 |
| cracking(14).txt | 0.5725 | 0.5025 | 0.5150 | 0.9950 |
| cracking(15).txt | 0.5025 | 0.7350 | 0.9950 | 0.3100 |
| cracking(162).txt | 0.5200 | 0.4800 | 0.9600 | 0.6700 |
| cracking(164).txt | 0.5125 | 0.5025 | 0.6050 | 0.9950 |
| cracking(169).txt | 0.5275 | 0.4825 | 0.4950 | 0.9550 |
| cracking(178).txt | 0.4900 | 0.4425 | 0.5300 | 0.8750 |
| cracking(20).txt | 0.5225 | 0.6100 | 0.9350 | 0.7800 |
| cracking(22).txt | 0.4700 | 0.2475 | 0.9300 | 0.0850 |
| cracking(22).txt | 0.5175 | 0.6525 | 0.3250 | 0.6950 |
| cracking(35).txt | 0.6200 | 0.5025 | 0.2100 | 0.9950 |
| cracking(38).txt | 0.7900 | 0.5025 | 0.2600 | 0.9950 |
| cracking(53).txt | 0.3850 | 0.5400 | 0.2600 | 0.7000 |
| cracking(56).txt | 0.3850 | 0.7100 | 0.1300 | 0.5800 |
| cracking(56).txt | 0.6950 | 0.5025 | 0.4500 | 0.9950 |
| cracking(6).txt | 0.5025 | 0.6300 | 0.9950 | 0.7400 |
| cracking(65).txt | 0.8300 | 0.5025 | 0.3400 | 0.9950 |
| cracking(73).txt | 0.3925 | 0.5050 | 0.2650 | 0.9900 |
| cracking(8).txt | 0.5018 | 0.3834 | 0.9965 | 0.3074 |
| cracking(80).txt | 0.5000 | 0.5025 | 0.2500 | 0.9950 |
| cracking(80).txt | 0.3325 | 0.5625 | 0.3350 | 0.4450 |
| cracking(81).txt | 0.4575 | 0.5025 | 0.4750 | 0.9950 |
| cracking(85).txt | 0.3000 | 0.5500 | 0.1200 | 0.9000 |
| cracking(85).txt | 0.4750 | 0.3425 | 0.3400 | 0.6750 |
| cracking(9).txt | 0.5025 | 0.4525 | 0.9950 | 0.4550 |
| cracking(90).txt | 0.2250 | 0.3650 | 0.4400 | 0.2000 |
| cracking(90).txt | 0.5600 | 0.5275 | 0.8800 | 0.1450 |
| cracking(91).txt | 0.5025 | 0.4650 | 0.9950 | 0.2600 |
| cracking(91).txt | 0.4850 | 0.6675 | 0.7600 | 0.2350 |
| cracking(93).txt | 0.5025 | 0.3700 | 0.9950 | 0.2200 |
| holes (10).txt | 0.7125 | 0.7750 | 0.2050 | 0.2100 |
| holes (10).txt | 0.4300 | 0.6700 | 0.1800 | 0.1700 |
| holes (10).txt | 0.5500 | 0.8200 | 0.0900 | 0.1100 |
| holes (10).txt | 0.3575 | 0.7975 | 0.1350 | 0.1150 |
| holes (10).txt | 0.3025 | 0.9250 | 0.1050 | 0.1200 |
| holes (101).txt | 0.5075 | 0.5050 | 0.0950 | 0.1500 |
| holes (101).txt | 0.2275 | 0.2700 | 0.0950 | 0.0800 |
| holes (101).txt | 0.0550 | 0.3500 | 0.1000 | 0.1000 |
| holes (101).txt | 0.4625 | 0.1775 | 0.1050 | 0.0950 |
| holes (101).txt | 0.7900 | 0.6600 | 0.0900 | 0.1000 |
| holes (102).txt | 0.2475 | 0.5100 | 0.2150 | 0.2000 |
| holes (102).txt | 0.6450 | 0.5400 | 0.1800 | 0.1800 |
| holes (104).txt | 0.4850 | 0.5275 | 0.1500 | 0.1950 |
| holes (105).txt | 0.7375 | 0.4025 | 0.2550 | 0.2250 |
| holes (110).txt | 0.8825 | 0.4750 | 0.1650 | 0.1600 |
| holes (110).txt | 0.5075 | 0.8325 | 0.1150 | 0.1150 |
| holes (110).txt | 0.1900 | 0.3050 | 0.1000 | 0.1100 |
| holes (110).txt | 0.3850 | 0.5250 | 0.1400 | 0.1300 |
| holes (110).txt | 0.4200 | 0.3975 | 0.1100 | 0.1250 |
| holes (110).txt | 0.9700 | 0.0750 | 0.0500 | 0.0900 |
| holes (116).txt | 0.2300 | 0.6000 | 0.2500 | 0.1800 |
| holes (119).txt | 0.5275 | 0.5550 | 0.1950 | 0.1400 |
| holes (119).txt | 0.2950 | 0.9400 | 0.1500 | 0.1200 |
| holes (122).txt | 0.3175 | 0.3325 | 0.1950 | 0.1750 |
| holes (122).txt | 0.6450 | 0.7675 | 0.2000 | 0.1450 |
| holes (124).txt | 0.3625 | 0.4050 | 0.2150 | 0.2100 |
| holes (124).txt | 0.7150 | 0.8050 | 0.1200 | 0.2100 |
| holes (128).txt | 0.4500 | 0.2150 | 0.1600 | 0.1600 |
| holes (128).txt | 0.6100 | 0.4075 | 0.1800 | 0.2550 |
| holes (128).txt | 0.5875 | 0.9250 | 0.1250 | 0.1500 |
| holes (130).txt | 0.8600 | 0.4325 | 0.1500 | 0.1750 |
| holes (133).txt | 0.3250 | 0.3450 | 0.2200 | 0.1700 |
| holes (138).txt | 0.7550 | 0.2650 | 0.1300 | 0.1900 |
| holes (141).txt | 0.3575 | 0.3500 | 0.1350 | 0.1800 |
| holes (142).txt | 0.2200 | 0.3775 | 0.1600 | 0.1550 |
| holes (149).txt | 0.6350 | 0.3650 | 0.2000 | 0.2700 |
| holes (154).txt | 0.6500 | 0.1150 | 0.1400 | 0.1500 |
| holes (155).txt | 0.5325 | 0.4600 | 0.1050 | 0.1600 |
| holes (157).txt | 0.4350 | 0.4400 | 0.1600 | 0.1400 |
| holes (159).txt | 0.7850 | 0.3575 | 0.1600 | 0.1150 |
| holes (16).txt | 0.6400 | 0.2250 | 0.1500 | 0.2200 |
| holes (16).txt | 0.6600 | 0.4500 | 0.0900 | 0.1100 |
| holes (16).txt | 0.8025 | 0.5550 | 0.1250 | 0.1200 |
| holes (16).txt | 0.9525 | 0.5300 | 0.0950 | 0.1200 |
| holes (16).txt | 0.7900 | 0.3725 | 0.0800 | 0.0950 |
| holes (165).txt | 0.7800 | 0.2800 | 0.2400 | 0.2100 |
| holes (166).txt | 0.4100 | 0.4575 | 0.2000 | 0.1850 |
| holes (167).txt | 0.3950 | 0.3350 | 0.1700 | 0.1500 |
| holes (170).txt | 0.5475 | 0.4100 | 0.1550 | 0.1000 |
| holes (179).txt | 0.4575 | 0.8075 | 0.2250 | 0.1850 |
| holes (180).txt | 0.4775 | 0.8175 | 0.1550 | 0.1950 |
| holes (181).txt | 0.5900 | 0.3600 | 0.1400 | 0.1300 |
| holes (182).txt | 0.8800 | 0.5625 | 0.2300 | 0.1650 |
| holes (183).txt | 0.8650 | 0.3500 | 0.1500 | 0.2000 |
| holes (185).txt | 0.2925 | 0.2850 | 0.1950 | 0.1400 |
| holes (187).txt | 0.4500 | 0.2700 | 0.2400 | 0.2400 |
| holes (188).txt | 0.6400 | 0.2825 | 0.1700 | 0.2050 |
| holes (191).txt | 0.5825 | 0.5975 | 0.2050 | 0.1850 |
| holes (191).txt | 0.4850 | 0.4975 | 0.1900 | 0.1150 |
| holes (192).txt | 0.1275 | 0.3575 | 0.2450 | 0.2650 |
| holes (192).txt | 0.2600 | 0.7525 | 0.2100 | 0.2650 |
| holes (2).txt | 0.2925 | 0.2425 | 0.1750 | 0.1250 |
| holes (2).txt | 0.7350 | 0.1100 | 0.1300 | 0.1200 |
| holes (213).txt | 0.4725 | 0.3125 | 0.1950 | 0.2350 |
| holes (213).txt | 0.8400 | 0.5325 | 0.1400 | 0.1150 |
| holes (213).txt | 0.9075 | 0.3675 | 0.0950 | 0.1050 |
| holes (213).txt | 0.5775 | 0.5150 | 0.0950 | 0.0800 |
| holes (213).txt | 0.7200 | 0.5850 | 0.0900 | 0.1100 |
| holes (215).txt | 0.1875 | 0.2350 | 0.1850 | 0.1200 |
| holes (217).txt | 0.0900 | 0.4450 | 0.1500 | 0.1700 |
| holes (217).txt | 0.2950 | 0.3475 | 0.1000 | 0.0950 |
| holes (217).txt | 0.2625 | 0.2475 | 0.0950 | 0.0750 |
| holes (217).txt | 0.4750 | 0.1575 | 0.1000 | 0.0850 |
| holes (217).txt | 0.6725 | 0.4975 | 0.1050 | 0.1350 |
| holes (222).txt | 0.4825 | 0.3100 | 0.1850 | 0.2100 |
| holes (222).txt | 0.8425 | 0.4925 | 0.1150 | 0.1450 |
| holes (222).txt | 0.8125 | 0.2600 | 0.0650 | 0.0800 |
| holes (222).txt | 0.9050 | 0.3525 | 0.1100 | 0.0850 |
| holes (225).txt | 0.2375 | 0.3425 | 0.1950 | 0.1750 |
| holes (227).txt | 0.4100 | 0.5325 | 0.1700 | 0.1850 |
| holes (227).txt | 0.8750 | 0.5750 | 0.2200 | 0.1600 |
| holes (227).txt | 0.0400 | 0.9350 | 0.0700 | 0.1300 |
| holes (233).txt | 0.4650 | 0.5250 | 0.2300 | 0.2900 |
| holes (236).txt | 0.4975 | 0.6900 | 0.2450 | 0.2900 |
| holes (236).txt | 0.6800 | 0.4925 | 0.2600 | 0.1950 |
| holes (236).txt | 0.7725 | 0.6300 | 0.2450 | 0.1000 |
| holes (253).txt | 0.8375 | 0.5500 | 0.2850 | 0.2900 |
| holes (254).txt | 0.4325 | 0.6325 | 0.5150 | 0.3750 |
| holes (262).txt | 0.7575 | 0.5525 | 0.3150 | 0.2250 |
| holes (264).txt | 0.4925 | 0.4425 | 0.1750 | 0.2050 |
| holes (264).txt | 0.3575 | 0.4375 | 0.1350 | 0.1150 |
| holes (276).txt | 0.1850 | 0.5525 | 0.2500 | 0.1850 |
| holes (283).txt | 0.6550 | 0.5850 | 0.1900 | 0.1600 |
| holes (298).txt | 0.4450 | 0.3825 | 0.1800 | 0.1950 |
| holes (298).txt | 0.1325 | 0.8925 | 0.2150 | 0.2050 |
| holes (34).txt | 0.5075 | 0.6400 | 0.1750 | 0.1800 |
| holes (34).txt | 0.1450 | 0.2075 | 0.1500 | 0.1550 |
| holes (36).txt | 0.4900 | 0.5000 | 0.1400 | 0.1100 |
| holes (36).txt | 0.2125 | 0.2875 | 0.1150 | 0.1150 |
| holes (36).txt | 0.7700 | 0.9375 | 0.1100 | 0.0950 |
| holes (36).txt | 0.0625 | 0.3800 | 0.1050 | 0.1200 |
| holes (36).txt | 0.4075 | 0.1925 | 0.1350 | 0.0950 |
| holes (36).txt | 0.8200 | 0.1650 | 0.1100 | 0.0800 |
| holes (36).txt | 0.9625 | 0.2175 | 0.0750 | 0.1550 |
| holes (36).txt | 0.8650 | 0.3000 | 0.1100 | 0.0800 |
| holes (46).txt | 0.4475 | 0.2725 | 0.1350 | 0.1550 |
| holes (53).txt | 0.6225 | 0.3650 | 0.3050 | 0.2000 |
| holes (55).txt | 0.4675 | 0.8700 | 0.1850 | 0.2000 |
| holes (59).txt | 0.3950 | 0.2275 | 0.1500 | 0.1550 |
| holes (69).txt | 0.6100 | 0.2875 | 0.3400 | 0.2250 |
| holes (7).txt | 0.0725 | 0.4650 | 0.1050 | 0.1700 |
| holes (7).txt | 0.2000 | 0.4675 | 0.1100 | 0.1650 |
| holes (7).txt | 0.3300 | 0.5700 | 0.1000 | 0.1600 |
| holes (7).txt | 0.3325 | 0.7850 | 0.1850 | 0.1100 |
| holes (76).txt | 0.2675 | 0.3600 | 0.1250 | 0.1500 |
| holes (76).txt | 0.4300 | 0.3225 | 0.1200 | 0.1550 |
| holes (76).txt | 0.5300 | 0.2125 | 0.1300 | 0.1250 |
| holes (81).txt | 0.3300 | 0.7575 | 0.2900 | 0.2050 |
| incomplete(102).txt | 0.5250 | 0.4800 | 0.3200 | 0.3600 |
| incomplete(109).txt | 0.5425 | 0.5000 | 0.2250 | 0.2800 |
| incomplete(112).txt | 0.5000 | 0.4950 | 0.3300 | 0.2100 |
| incomplete(113).txt | 0.5200 | 0.5100 | 0.2400 | 0.2600 |
| incomplete(119).txt | 0.4825 | 0.4400 | 0.2350 | 0.5100 |
| incomplete(120).txt | 0.5175 | 0.4150 | 0.3850 | 0.4500 |
| incomplete(121).txt | 0.5150 | 0.4400 | 0.5300 | 0.3000 |
| incomplete(122).txt | 0.5225 | 0.4375 | 0.4950 | 0.2750 |
| incomplete(131).txt | 0.5575 | 0.5575 | 0.3250 | 0.3950 |
| incomplete(148).txt | 0.6075 | 0.3975 | 0.1950 | 0.1250 |
| incomplete(15).txt | 0.5000 | 0.6325 | 0.2600 | 0.2350 |
| incomplete(150).txt | 0.5200 | 0.3775 | 0.1900 | 0.1550 |
| incomplete(152).txt | 0.4325 | 0.3375 | 0.1250 | 0.2250 |
| incomplete(153).txt | 0.3425 | 0.4600 | 0.2350 | 0.2100 |
| incomplete(157).txt | 0.3700 | 0.5700 | 0.1800 | 0.2100 |
| incomplete(159).txt | 0.3600 | 0.4625 | 0.1600 | 0.2250 |
| incomplete(162).txt | 0.7075 | 0.1200 | 0.3350 | 0.2200 |
| incomplete(165).txt | 0.7400 | 0.3700 | 0.4500 | 0.3100 |
| incomplete(17).txt | 0.4625 | 0.6425 | 0.2150 | 0.2850 |
| incomplete(174).txt | 0.5000 | 0.2800 | 0.4600 | 0.4700 |
| incomplete(174).txt | 0.1900 | 0.5600 | 0.3200 | 0.4300 |
| incomplete(176).txt | 0.4300 | 0.6325 | 0.6800 | 0.7350 |
| incomplete(179).txt | 0.6700 | 0.3000 | 0.6000 | 0.5300 |
| incomplete(18).txt | 0.4450 | 0.6325 | 0.1900 | 0.3250 |
| incomplete(195).txt | 0.8050 | 0.4225 | 0.2600 | 0.3150 |
| incomplete(200).txt | 0.7800 | 0.8125 | 0.2300 | 0.1550 |
| incomplete(200).txt | 0.3000 | 0.8025 | 0.5300 | 0.1250 |
| incomplete(208).txt | 0.2600 | 0.7600 | 0.1500 | 0.2200 |
| incomplete(208).txt | 0.4275 | 0.3975 | 0.1250 | 0.1850 |
| incomplete(221).txt | 0.4150 | 0.4675 | 0.6300 | 0.7150 |
| incomplete(225).txt | 0.5350 | 0.5625 | 0.4300 | 0.7650 |
| incomplete(228).txt | 0.6650 | 0.3075 | 0.2300 | 0.6050 |
| incomplete(229).txt | 0.3925 | 0.2600 | 0.5050 | 0.4500 |
| incomplete(230).txt | 0.4375 | 0.2525 | 0.4550 | 0.4950 |
| incomplete(232).txt | 0.5025 | 0.5100 | 0.9950 | 0.5200 |
| incomplete(233).txt | 0.3650 | 0.5150 | 0.7100 | 0.2600 |
| incomplete(233).txt | 0.8600 | 0.3850 | 0.2800 | 0.4500 |
| incomplete(24).txt | 0.3975 | 0.4075 | 0.3450 | 0.1850 |
| incomplete(246).txt | 0.4225 | 0.3325 | 0.3150 | 0.1750 |
| incomplete(251).txt | 0.3900 | 0.6425 | 0.2000 | 0.2250 |
| incomplete(253).txt | 0.4275 | 0.6200 | 0.2750 | 0.2000 |
| incomplete(269).txt | 0.3875 | 0.5475 | 0.6750 | 0.5150 |
| incomplete(280).txt | 0.5250 | 0.5200 | 0.4400 | 0.1600 |
| incomplete(29).txt | 0.5650 | 0.5200 | 0.1900 | 0.2100 |
| incomplete(296).txt | 0.3525 | 0.4825 | 0.5950 | 0.4750 |
| incomplete(296).txt | 0.8300 | 0.3750 | 0.2000 | 0.2200 |
| incomplete(298).txt | 0.6425 | 0.2550 | 0.3950 | 0.4400 |
| incomplete(300).txt | 0.3900 | 0.4025 | 0.5400 | 0.7050 |
| incomplete(32).txt | 0.5325 | 0.5375 | 0.1450 | 0.2750 |
| incomplete(34).txt | 0.4925 | 0.5650 | 0.1250 | 0.2300 |
| incomplete(36).txt | 0.4800 | 0.5200 | 0.2200 | 0.1500 |
| incomplete(4).txt | 0.5700 | 0.3675 | 0.2000 | 0.3350 |
| incomplete(5).txt | 0.6200 | 0.3650 | 0.2200 | 0.3600 |
| incomplete(50).txt | 0.5250 | 0.4525 | 0.1400 | 0.2350 |
| incomplete(52).txt | 0.5225 | 0.6800 | 0.3450 | 0.5100 |
| incomplete(53).txt | 0.4900 | 0.6950 | 0.3300 | 0.4000 |
| incomplete(56).txt | 0.3425 | 0.6200 | 0.5150 | 0.2400 |
| incomplete(57).txt | 0.3625 | 0.5650 | 0.5350 | 0.2500 |
| incomplete(59).txt | 0.3150 | 0.5675 | 0.4500 | 0.2750 |
| incomplete(60).txt | 0.3475 | 0.4750 | 0.4950 | 0.4100 |
| incomplete(61).txt | 0.3150 | 0.4275 | 0.3800 | 0.4250 |
| incomplete(63).txt | 0.4450 | 0.3075 | 0.1800 | 0.4750 |
| incomplete(65).txt | 0.5350 | 0.2475 | 0.3600 | 0.4150 |
| incomplete(69).txt | 0.6750 | 0.5875 | 0.2800 | 0.4750 |
| incomplete(70).txt | 0.5075 | 0.4475 | 0.9050 | 0.7150 |
| incomplete(78).txt | 0.6125 | 0.5175 | 0.6050 | 0.9650 |
| incomplete(82).txt | 0.4950 | 0.5050 | 0.9700 | 0.9200 |
| incomplete(84).txt | 0.4175 | 0.4550 | 0.8150 | 0.8900 |
| incomplete(87).txt | 0.4625 | 0.5075 | 0.7550 | 0.9850 |
| incomplete(91).txt | 0.5325 | 0.3875 | 0.9350 | 0.7150 |
| mineralization (10).txt | 0.5525 | 0.5325 | 0.8650 | 0.8450 |
| mineralization (101).txt | 0.4950 | 0.4975 | 0.9800 | 0.9750 |
| mineralization (102).txt | 0.5050 | 0.5050 | 0.9800 | 0.9900 |
| mineralization (107).txt | 0.5075 | 0.4925 | 0.9850 | 0.9750 |
| mineralization (11).txt | 0.5000 | 0.6125 | 0.8700 | 0.6450 |
| mineralization (114).txt | 0.4975 | 0.5025 | 0.9750 | 0.9950 |
| mineralization (119).txt | 0.5000 | 0.5025 | 0.9900 | 0.9950 |
| mineralization (12).txt | 0.5250 | 0.5700 | 0.9500 | 0.8400 |
| mineralization (120).txt | 0.4925 | 0.5075 | 0.9650 | 0.9850 |
| mineralization (124).txt | 0.5075 | 0.5025 | 0.9850 | 0.9950 |
| mineralization (125).txt | 0.4900 | 0.5025 | 0.9700 | 0.9950 |
| mineralization (143).txt | 0.5000 | 0.5025 | 0.9700 | 0.9950 |
| mineralization (149).txt | 0.5125 | 0.5050 | 0.9750 | 0.9900 |
| mineralization (150).txt | 0.5125 | 0.4850 | 0.9750 | 0.9600 |
| mineralization (167).txt | 0.5150 | 0.5050 | 0.9700 | 0.9900 |
| mineralization (172).txt | 0.5050 | 0.5075 | 0.9700 | 0.9850 |
| mineralization (174).txt | 0.5100 | 0.5050 | 0.9800 | 0.9800 |
| mineralization (177).txt | 0.5025 | 0.5075 | 0.9450 | 0.9750 |
| mineralization (179).txt | 0.5100 | 0.5075 | 0.9600 | 0.9850 |
| mineralization (18).txt | 0.4875 | 0.5075 | 0.8850 | 0.8550 |
| mineralization (185).txt | 0.4925 | 0.5025 | 0.9750 | 0.9750 |
| mineralization (192).txt | 0.5100 | 0.5025 | 0.9800 | 0.9950 |
| mineralization (200).txt | 0.4975 | 0.4925 | 0.9650 | 0.9650 |
| mineralization (206).txt | 0.5175 | 0.5100 | 0.9650 | 0.9800 |
| mineralization (209).txt | 0.5025 | 0.4950 | 0.9550 | 0.9500 |
| mineralization (210).txt | 0.5100 | 0.5050 | 0.9800 | 0.9900 |
| mineralization (216).txt | 0.5125 | 0.5050 | 0.9750 | 0.9900 |
| mineralization (220).txt | 0.5025 | 0.5050 | 0.9550 | 0.9900 |
| mineralization (23).txt | 0.5075 | 0.5200 | 0.9650 | 0.9200 |
| mineralization (236).txt | 0.4975 | 0.5075 | 0.9650 | 0.9850 |
| mineralization (240).txt | 0.5050 | 0.5100 | 0.9900 | 0.9800 |
| mineralization (247).txt | 0.5050 | 0.5025 | 0.9900 | 0.9950 |
| mineralization (248).txt | 0.5100 | 0.5100 | 0.9600 | 0.9800 |
| mineralization (250).txt | 0.5025 | 0.4750 | 0.9950 | 0.9300 |
| mineralization (260).txt | 0.5025 | 0.5000 | 0.9250 | 0.9800 |
| mineralization (263).txt | 0.5100 | 0.5100 | 0.9800 | 0.9700 |
| mineralization (266).txt | 0.5075 | 0.4850 | 0.9850 | 0.9400 |
| mineralization (275).txt | 0.5025 | 0.5050 | 0.9950 | 0.9900 |
| mineralization (276).txt | 0.5075 | 0.4850 | 0.9850 | 0.9600 |
| mineralization (277).txt | 0.5125 | 0.5125 | 0.9750 | 0.9750 |
| mineralization (280).txt | 0.4950 | 0.5075 | 0.9100 | 0.9650 |
| mineralization (284).txt | 0.5025 | 0.5025 | 0.9950 | 0.9950 |
| mineralization (291).txt | 0.5125 | 0.5075 | 0.9750 | 0.9850 |
| mineralization (296).txt | 0.5075 | 0.5050 | 0.9750 | 0.9900 |
| mineralization (35).txt | 0.5150 | 0.5000 | 0.9100 | 0.8600 |
| mineralization (36).txt | 0.5250 | 0.5150 | 0.8900 | 0.9100 |
| mineralization (39).txt | 0.5175 | 0.4875 | 0.8350 | 0.9350 |
| mineralization (4).txt | 0.5325 | 0.4475 | 0.9350 | 0.8350 |
| mineralization (41).txt | 0.5150 | 0.5250 | 0.8900 | 0.9500 |
| mineralization (42).txt | 0.5050 | 0.4925 | 0.9500 | 0.8950 |
| mineralization (44).txt | 0.5250 | 0.5150 | 0.8900 | 0.9700 |
| mineralization (52).txt | 0.5050 | 0.5000 | 0.9900 | 0.9900 |
| mineralization (64).txt | 0.4525 | 0.5100 | 0.8550 | 0.9800 |
| mineralization (64).txt | 0.9475 | 0.7075 | 0.1050 | 0.3350 |
| mineralization (91).txt | 0.5100 | 0.4925 | 0.9800 | 0.9750 |
| mineralization (93).txt | 0.7550 | 0.3625 | 0.4900 | 0.6950 |
| mineralization (99).txt | 0.5050 | 0.5025 | 0.9900 | 0.9950 |

**Table S3. YOLOv5 code from PyCharm2021.3.1**

| # Parameters |
| --- |
| nc: 80 # number of classes |
| depth_multiple: 0.33 # model depth multiple |
| width_multiple: 0.50 # layer channel multiple |
| anchors: |
| - [10, 13, 16, 30, 33, 23] # P3/8 |
| - [30, 61, 62, 45, 59, 119] # P4/16 |
| - [116, 90, 156, 198, 373, 326] # P5/32 |
| # YOLOv5s v6.0 backbone |
| backbone: |
| # [from, number, module, args] |
| [[-1, 1, Conv, [64, 6, 2, 2]], # 0-P1/2 |
| [-1, 1, Conv, [128, 3, 2]], # 1-P2/4 |
| [-1, 3, C3, [128]], # 2 |
| [-1, 1, Conv, [256, 3, 2]], # 3-P3/8 |
| [-1, 6, C3, [256]], # 4 |
| [-1, 1, Conv, [512, 3, 2]], # 5-P4/16 |
| [-1, 9, C3, [512]], |
| [-1, 1, Conv, [1024, 3, 2]], # 7-P5/32 |
| [-1, 3, C3, [1024]], |
| [-1, 1, SPPF, [1024, 5]], # 9 |
| ] |
| # YOLOv5s v6.0 head |
| head: |
| [[-1, 1, Conv, [512, 1, 1]], |
| [-1, 1, nn.Upsample, [None, 2, 'nearest']], #11 |
| [[-1, 6], 1, Concat, [1]], # 12 cat backbone P4 |
| [-1, 3, C3, [512, False]], # 13 |
| [-1, 1, Conv, [256, 1, 1]], |
| [-1, 1, nn.Upsample, [None, 2, 'nearest']], |
| [[-1, 4], 1, Concat, [1]], # cat backbone P3 |
| [-1, 3, C3, [256, False]], # 17 (P3/8-small) |
| [-1, 1, Conv, [256, 3, 2]], |
| [[-1, 14], 1, Concat, [1]], # cat head P4， |
| [-1, 3, C3, [512, False]], # 20 (P4/16-medium) |
| [-1, 1, Conv, [512, 3, 2]], |
| [[-1, 10], 1, Concat, [1]], # cat head P5， |
| [-1, 3, C3, [1024, False]], # 23 (P5/32-large) |
| [[17, 20, 23], 1, Detect, [nc, anchors]], # Detect(P3, P4, P5) |
| ] |

**Table S4. yolov5s-GCB code from PyCharm2021.3.1**

| # Parameters |
| --- |
| nc: 80 # number of classes |
| depth_multiple: 0.33 # model depth multiple |
| width_multiple: 0.50 # layer channel multiple |
| anchors: |
| - [10, 13, 16, 30, 33, 23] # P3/8 |
| - [30, 61, 62, 45, 59, 119] # P4/16 |
| - [116, 90, 156, 198, 373, 326] # P5/32 |
| # YOLOv5 v6.0 backbone |
| backbone: |
| # [from, number, module, args] |
| [ |
| [-1, 1, GhostConv, [64, 3, 2]], # 0-P1/2 |
| [-1, 1, GhostConv, [128, 3, 2]], # 1-P2/4 |
| [-1, 3, C3Ghost, [128]], |
| [-1, 1, GhostConv, [256, 3, 2]], # 3-P3/8 |
| [-1, 6, C3Ghost, [256]], |
| [-1, 1, GhostConv, [512, 3, 2]], # 5-P4/16 |
| [-1, 9, C3Ghost, [512]], |
| [-1, 1, GhostConv, [1024, 3, 2]], # 7-P5/32 |
| [-1, 3, C3Ghost, [1024]], |
| [-1, 1, CoordAtt, [1024]], |
| [-1, 1, SPPF, [1024, 5]], # 9 |
| ] |
| # YOLOV5 V6.1 BiFPN head |
| head: |
| [ |
| [-1, 1, Conv, [512, 1, 1]], |
| [-1, 1, nn.Upsample, [None, 2, 'nearest']], |
| [[-1, 6], 1, BiFPN_Add2, [256, 256]], # cat backbone P4 |
| [-1, 3, C3, [512, False]], # 13 |
| [-1, 1, Conv, [256, 1, 1]], |
| [-1, 1, nn.Upsample, [None, 2, 'nearest' ]], |
| [[-1, 4], 1, BiFPN_Add2, [128, 128]], # cat backbone P3 |
| [-1, 3, C3, [256, False]], # 17 |
| [-1, 1, Conv, [512, 3, 2]], |
| [[-1, 14, 6], 1, BiFPN_Add3, [256, 256]], |
| [-1, 3, C3, [512, False]], # 20 |
| [-1, 1, Conv, [512, 3, 2]], |
| [[-1, 11], 1, BiFPN_Add2, [256, 256]], # cat head P5 |
| [-1, 3, C3, [1024, False]], # 23 |
| [[18, 21, 24], 1, Detect, [nc, anchors]], # Detect(P3, P4, P5) |
| ] |

**Table S5. yolov5s_EfficientNetV2_CA code from PyCharm2021.3.1**

| # Parameters |
| --- |
| nc: 80 # number of classes |
| depth_multiple: 0.33 # model depth multiple |
| width_multiple: 0.50 # layer channel multiple |
| anchors: |
| - [10, 13, 16, 30, 33, 23] # P3/8 |
| - [30, 61, 62, 45, 59, 119] # P4/16 |
| - [116, 90, 156, 198, 373, 326] # P5/32 |
| # YOLOv5 v6.0 backbone |
| backbone: |
| # [from, number, module, args] |
| [ |
| [-1, 1, stem, [24, 3, 2]], # 0-P1/2 |
| [-1, 2, FusedMBConv, [24, 3, 1, 1, 0]], # 1-P2/4 |
| [-1, 1, FusedMBConv, [48, 3, 2, 4, 0]], |
| [-1, 3, FusedMBConv, [48, 3, 1, 4, 0]], # 3-P3/8 |
| [-1, 1, FusedMBConv, [64, 3, 2, 4, 0]], |
| [-1, 3, FusedMBConv, [64, 3, 1, 4, 0]], # 5-P4/16 |
| [-1, 1, MBConv, [128, 3, 2, 4, 0.25]], |
| [-1, 5, MBConv, [128, 3, 1, 4, 0.25]], # 7-P5/32 |
| [-1, 1, MBConv, [160, 3, 2, 6, 0.25]], |
| [-1, 8, MBConv, [160, 3, 1, 6, 0.25]], # 9 |
| [-1, 1, MBConv, [272, 3, 2, 4, 0.25]], |
| [-1, 14, MBConv, [272, 3, 1, 4, 0.25 ]], |
| [-1, 1, CoordAtt, [272]], |
| [-1, 1, SPPF, [1024, 5]] |
| ] |
| # YOLOv5 v6.0 head |
| head: [ |
| [-1, 1, Conv, [512, 1, 1]], |
| [-1, 1, nn.Upsample, [None, 2, "nearest"]], |
| [[-1, 9], 1, Concat, [1]], # cat backbone P4 |
| [-1, 3, C3, [512, False]], # 13 |
| [-1, 1, Conv, [256, 1, 1]], |
| [-1, 1, nn.Upsample, [None, 2, "nearest"]], |
| [[-1, 7], 1, Concat, [1]], # cat backbone P3 |
| [-1, 3, C3, [256, False]], # 17 (P3/8-small) |
| [-1, 1, Conv, [256, 3, 2]], |
| [[-1, 18], 1, Concat, [1]], # cat head P4 |
| [-1, 3, C3, [512, False]], # 20 (P4/16-medium) |
| [-1, 1, Conv, [512, 3, 2]], |
| [[-1, 14], 1, Concat, [1]], # cat head P5 |
| [-1, 3, C3, [1024, False]], # 23 (P5/32-large) |
| [[21, 24, 27], 1, Detect, [nc, anchors]], # Detect(P3, P4, P5) |
| ] |

**Table S6. yolov5s_EfficientNetV2 code from PyCharm2021.3.1**

| # Parameters |
| --- |
| nc: 80 # number of classes |
| depth_multiple: 0.33 # model depth multiple |
| width_multiple: 0.50 # layer channel multiple |
| anchors: |
| - [10, 13, 16, 30, 33, 23] # P3/8 |
| - [30, 61, 62, 45, 59, 119] # P4/16 |
| - [116, 90, 156, 198, 373, 326] # P5/32 |
| # YOLOv5 v6.0 backbone |
| backbone: |
| # [from, number, module, args] |
| [ |
| [-1, 1, stem, [24, 3, 2]], # 0-P1/2 |
| [-1, 2, FusedMBConv, [24, 3, 1, 1, 0]], # 1-P2/4 |
| [-1, 1, FusedMBConv, [48, 3, 2, 4, 0]], |
| [-1, 3, FusedMBConv, [48, 3, 1, 4, 0]], # 3-P3/8 |
| [-1, 1, FusedMBConv, [64, 3, 2, 4, 0]], |
| [-1, 3, FusedMBConv, [64, 3, 1, 4, 0]], # 5-P4/16 |
| [-1, 1, MBConv, [128, 3, 2, 4, 0.25]], |
| [-1, 5, MBConv, [128, 3, 1, 4, 0.25]], # 7-P5/32 |
| [-1, 1, MBConv, [160, 3, 2, 6, 0.25]], |
| [-1, 8, MBConv, [160, 3, 1, 6, 0.25]], # 9 |
| [-1, 1, MBConv, [272, 3, 2, 4, 0.25]], |
| [-1, 14, MBConv, [272, 3, 1, 4, 0.25 ]], |
| [-1, 1, SPPF, [1024, 5]] |
| ] |
| # YOLOv5 v6.0 head |
| head: [ |
| [-1, 1, Conv, [512, 1, 1]], |
| [-1, 1, nn.Upsample, [None, 2, "nearest"]], |
| [[-1, 9], 1, Concat, [1]], # cat backbone P4 |
| [-1, 3, C3, [512, False]], # 13 |
| [-1, 1, Conv, [256, 1, 1]], |
| [-1, 1, nn.Upsample, [None, 2, "nearest"]], |
| [[-1, 7], 1, Concat, [1]], # cat backbone P3 |
| [-1, 3, C3, [256, False]], # 17 (P3/8-small) |
| [-1, 1, Conv, [256, 3, 2]], |
| [[-1, 17], 1, Concat, [1]], # cat head P4 |
| [-1, 3, C3, [512, False]], # 20 (P4/16-medium) |
| [-1, 1, Conv, [512, 3, 2]], |
| [[-1, 13], 1, Concat, [1]], # cat head P5 |
| [-1, 3, C3, [1024, False]], # 23 (P5/32-large) |
| [[20, 23, 26], 1, Detect, [nc, anchors]], # Detect(P3, P4, P5) |
| ] |

**Table S7. common.py code for adding network structure by PyCharm2021.3.1**

| import ast |
| --- |
| import contextlib |
| import json |
| import math |
| import platform |
| import warnings |
| import zipfile |
| from collections import OrderedDict, namedtuple |
| from copy import copy |
| from pathlib import Path |
| from urllib.parse import urlparse |
| import cv2 |
| import numpy as np |
| import pandas as pd |
| import requests |
| import torch |
| import torch.nn as nn |
| from PIL import Image |
| from torch.cuda import amp |
| # Import 'ultralytics' package or install if missing |
| from ultralytics.nn.modules import C3 |
| try: |
| import ultralytics |
| assert hasattr(ultralytics, "__version__") # verify package is not directory |
| except (ImportError, AssertionError): |
| import os |
| os.system("pip install -U ultralytics") |
| import ultralytics |
| from ultralytics.utils.plotting import Annotator, colors, save_one_box |
| from utils import TryExcept |
| from utils.dataloaders import exif_transpose, letterbox |
| from utils.general import ( |
| LOGGER, |
| ROOT, |
| Profile, |
| check_requirements, |
| check_suffix, |
| check_version, |
| colorstr, |
| increment_path, |
| is_jupyter, |
| make_divisible, |
| non_max_suppression, |
| scale_boxes, |
| xywh2xyxy, |
| xyxy2xywh, |
| yaml_load, |
| ) |
| from utils.torch_utils import copy_attr, smart_inference_mode |
| def channel_shuffle(x, groups): |
| batchsize, num_channels, height, width = x.data.size() |
| channels_per_group = num_channels // groups |
| x = x.view(batchsize, groups, channels_per_group, height, width) |
| x = torch.transpose(x, 1, 2).contiguous() |
| x = x.view(batchsize, -1, height, width) |
| return x |
| class stem(nn.Module): |
| def __init__(self, c1, c2): |
| super(stem, self).__init__() |
| self.conv = nn.Sequential( |
| nn.Conv2d(c1, c2, kernel_size=3, stride=2, padding=1, bias=False), |
| nn.BatchNorm2d(c2), |
| nn.ReLU(inplace=True), |
| ) |
| self.maxpool = nn.MaxPool2d(kernel_size=3, stride=2, padding=1, dilation=1, ceil_mode=False) |
| def forward(self, x): |
| return self.maxpool(self.conv(x)) |
| class Shuffle_Block(nn.Module): |
| def __init__(self, ch_in, ch_out, stride): |
| super(Shuffle_Block, self).__init__() |
| if not (1 <= stride <= 2): |
| raise ValueError('illegal stride value') |
| self.stride = stride |
| branch_features = ch_out // 2 |
| assert (self.stride != 1) or (ch_in == branch_features << 1) |
| if self.stride > 1: |
| self.branch1 = nn.Sequential( |
| self.depthwise_conv(ch_in, ch_in, kernel_size=3, stride=self.stride, padding=1), |
| nn.BatchNorm2d(ch_in), |
| nn.Conv2d(ch_in, branch_features, kernel_size=1, stride=1, padding=0, bias=False), |
| nn.BatchNorm2d(branch_features), |
| nn.ReLU(inplace=True), |
| ) |
| self.branch2 = nn.Sequential( |
| nn.Conv2d(ch_in if (self.stride > 1) else branch_features, |
| branch_features, kernel_size=1, stride=1, padding=0, bias=False), |
| nn.BatchNorm2d(branch_features), |
| nn.ReLU(inplace=True), |
| self.depthwise_conv(branch_features, branch_features, kernel_size=3, stride=self.stride, padding=1), |
| nn.BatchNorm2d(branch_features), |
| nn.Conv2d(branch_features, branch_features, kernel_size=1, stride=1, padding=0, bias=False), |
| nn.BatchNorm2d(branch_features), |
| nn.ReLU(inplace=True), |
| ) |
| @staticmethod |
| def depthwise_conv(i, o, kernel_size, stride=1, padding=0, bias=False): |
| return nn.Conv2d(i, o, kernel_size, stride, padding, bias=bias, groups=i) |
| def forward(self, x): |
| if self.stride == 1: |
| x1, x2 = x.chunk(2, dim=1) |
| out = torch.cat((x1, self.branch2(x2)), dim=1) |
| else: |
| out = torch.cat((self.branch1(x), self.branch2(x)), dim=1) |
| out = channel_shuffle(out, 2) |
| return out |
| def autopad(k, p=None, d=1): |
| """ |
| Pads kernel to 'same' output shape, adjusting for optional dilation; returns padding size. |
| `k`: kernel, `p`: padding, `d`: dilation. |
| """ |
| if d > 1: |
| k = d * (k - 1) + 1 if isinstance(k, int) else [d * (x - 1) + 1 for x in k] # actual kernel-size |
| if p is None: |
| p = k // 2 if isinstance(k, int) else [x // 2 for x in k] # auto-pad |
| return p |
| class GhostConv(nn.Module): |
| def __init__(self, c1, c2, k=1, s=1, g=1, act=True): |
| super(GhostConv, self).__init__() |
| c_ = c2 // 2 |
| self.cv1 = Conv(c1, c_, k, s, None, g, act) |
| self.cv2 = Conv(c_, c_, 5, 1, None, c_, act) |
| def forward(self, x): |
| y = self.cv1(x) |
| return torch.cat([y, self.cv2(y)], 1) |
| class GhostBottleneck(nn.Module): |
| def __init__(self, c1, c2, k=3, s=1): |
| super().__init__() |
| c_ = c2 // 2 |
| self.conv = nn.Sequential( |
| GhostConv(c1, c_, 1, 1), |
| DWConv(c_, c_, k, s, act=False) if s == 2 else nn.Identity(), |
| GhostConv(c_, c2, 1, 1, act=False)) |
| self.shortcut = nn.Sequential(DWConv(c1, c1, k, s, act=False), Conv(c1, c2, 1, 1, |
| act=False)) if s == 2 else nn.Identity() |
| def forward(self, x): |
| return self.conv(x) + self.shortcut(x) |
| class C3Ghost(C3): |
| def __init__(self, c1, c2, n=1, shortcut=True, g=1, e=0.5): |
| super().__init__(c1, c2, n, shortcut, g, e) |
| c_ = int(c2 * e) |
| self.m = nn.Sequential(*(GhostBottleneck(c_, c_) for _ in range(n))) |
| class Conv(nn.Module): |
| """Applies a convolution, batch normalization, and activation function to an input tensor in a neural network.""" |
| default_act = nn.SiLU() # default activation |
| def __init__(self, c1, c2, k=1, s=1, p=None, g=1, d=1, act=True): |
| """Initializes a standard convolution layer with optional batch normalization and activation.""" |
| super().__init__() |
| self.conv = nn.Conv2d(c1, c2, k, s, autopad(k, p, d), groups=g, dilation=d, bias=False) |
| self.bn = nn.BatchNorm2d(c2) |
| self.act = self.default_act if act is True else act if isinstance(act, nn.Module) else nn.Identity() |
| def forward(self, x): |
| """Applies a convolution followed by batch normalization and an activation function to the input tensor `x`.""" |
| return self.act(self.bn(self.conv(x))) |
| def forward_fuse(self, x): |
| """Applies a fused convolution and activation function to the input tensor `x`.""" |
| return self.act(self.conv(x)) |
| class DWConv(Conv): |
| """Implements a depth-wise convolution layer with optional activation for efficient spatial filtering.""" |
| def __init__(self, c1, c2, k=1, s=1, d=1, act=True): |
| """Initializes a depth-wise convolution layer with optional activation; args: input channels (c1), output |
| channels (c2), kernel size (k), stride (s), dilation (d), and activation flag (act). |
| """ |
| super().__init__(c1, c2, k, s, g=math.gcd(c1, c2), d=d, act=act) |
| class DWConvTranspose2d(nn.ConvTranspose2d): |
| """A depth-wise transpose convolutional layer for upsampling in neural networks, particularly in YOLOv5 models.""" |
| def __init__(self, c1, c2, k=1, s=1, p1=0, p2=0): |
| """Initializes a depth-wise transpose convolutional layer for YOLOv5; args: input channels (c1), output channels |
| (c2), kernel size (k), stride (s), input padding (p1), output padding (p2). |
| """ |
| super().__init__(c1, c2, k, s, p1, p2, groups=math.gcd(c1, c2)) |
| class TransformerLayer(nn.Module): |
| """Transformer layer with multihead attention and linear layers, optimized by removing LayerNorm.""" |
| def __init__(self, c, num_heads): |
| """ |
| Initializes a transformer layer, sans LayerNorm for performance, with multihead attention and linear layers. |
| See as described in https://arxiv.org/abs/2010.11929. |
| """ |
| super().__init__() |
| self.q = nn.Linear(c, c, bias=False) |
| self.k = nn.Linear(c, c, bias=False) |
| self.v = nn.Linear(c, c, bias=False) |
| self.ma = nn.MultiheadAttention(embed_dim=c, num_heads=num_heads) |
| self.fc1 = nn.Linear(c, c, bias=False) |
| self.fc2 = nn.Linear(c, c, bias=False) |
| def forward(self, x): |
| """Performs forward pass using MultiheadAttention and two linear transformations with residual connections.""" |
| x = self.ma(self.q(x), self.k(x), self.v(x))[0] + x |
| x = self.fc2(self.fc1(x)) + x |
| return x |
| class TransformerBlock(nn.Module): |
| """A Transformer block for vision tasks with convolution, position embeddings, and Transformer layers.""" |
| def __init__(self, c1, c2, num_heads, num_layers): |
| """Initializes a Transformer block for vision tasks, adapting dimensions if necessary and stacking specified |
| layers. |
| """ |
| super().__init__() |
| self.conv = None |
| if c1 != c2: |
| self.conv = Conv(c1, c2) |
| self.linear = nn.Linear(c2, c2) # learnable position embedding |
| self.tr = nn.Sequential(*(TransformerLayer(c2, num_heads) for _ in range(num_layers))) |
| self.c2 = c2 |
| def forward(self, x): |
| """Processes input through an optional convolution, followed by Transformer layers and position embeddings for |
| object detection. |
| """ |
| if self.conv is not None: |
| x = self.conv(x) |
| b, _, w, h = x.shape |
| p = x.flatten(2).permute(2, 0, 1) |
| return self.tr(p + self.linear(p)).permute(1, 2, 0).reshape(b, self.c2, w, h) |
| class Bottleneck(nn.Module): |
| """A bottleneck layer with optional shortcut and group convolution for efficient feature extraction.""" |
| def __init__(self, c1, c2, shortcut=True, g=1, e=0.5): |
| """Initializes a standard bottleneck layer with optional shortcut and group convolution, supporting channel |
| expansion. |
| """ |
| super().__init__() |
| c_ = int(c2 * e) # hidden channels |
| self.cv1 = Conv(c1, c_, 1, 1) |
| self.cv2 = Conv(c_, c2, 3, 1, g=g) |
| self.add = shortcut and c1 == c2 |
| def forward(self, x): |
| """Processes input through two convolutions, optionally adds shortcut if channel dimensions match; input is a |
| tensor. |
| """ |
| return x + self.cv2(self.cv1(x)) if self.add else self.cv2(self.cv1(x)) |
| class BottleneckCSP(nn.Module): |
| """CSP bottleneck layer for feature extraction with cross-stage partial connections and optional shortcuts.""" |
| def __init__(self, c1, c2, n=1, shortcut=True, g=1, e=0.5): |
| """Initializes CSP bottleneck with optional shortcuts; args: ch_in, ch_out, number of repeats, shortcut bool, |
| groups, expansion. |
| """ |
| super().__init__() |
| c_ = int(c2 * e) # hidden channels |
| self.cv1 = Conv(c1, c_, 1, 1) |
| self.cv2 = nn.Conv2d(c1, c_, 1, 1, bias=False) |
| self.cv3 = nn.Conv2d(c_, c_, 1, 1, bias=False) |
| self.cv4 = Conv(2 * c_, c2, 1, 1) |
| self.bn = nn.BatchNorm2d(2 * c_) # applied to cat(cv2, cv3) |
| self.act = nn.SiLU() |
| self.m = nn.Sequential(*(Bottleneck(c_, c_, shortcut, g, e=1.0) for _ in range(n))) |
| def forward(self, x): |
| """Performs forward pass by applying layers, activation, and concatenation on input x, returning feature- |
| enhanced output. |
| """ |
| y1 = self.cv3(self.m(self.cv1(x))) |
| y2 = self.cv2(x) |
| return self.cv4(self.act(self.bn(torch.cat((y1, y2), 1)))) |
| class CrossConv(nn.Module): |
| """Implements a cross convolution layer with downsampling, expansion, and optional shortcut.""" |
| def __init__(self, c1, c2, k=3, s=1, g=1, e=1.0, shortcut=False): |
| """ |
| Initializes CrossConv with downsampling, expanding, and optionally shortcutting; `c1` input, `c2` output |
| channels. |
| Inputs are ch_in, ch_out, kernel, stride, groups, expansion, shortcut. |
| """ |
| super().__init__() |
| c_ = int(c2 * e) # hidden channels |
| self.cv1 = Conv(c1, c_, (1, k), (1, s)) |
| self.cv2 = Conv(c_, c2, (k, 1), (s, 1), g=g) |
| self.add = shortcut and c1 == c2 |
| def forward(self, x): |
| """Performs feature sampling, expanding, and applies shortcut if channels match; expects `x` input tensor.""" |
| return x + self.cv2(self.cv1(x)) if self.add else self.cv2(self.cv1(x)) |
| class C3(nn.Module): |
| """Implements a CSP Bottleneck module with three convolutions for enhanced feature extraction in neural networks.""" |
| def __init__(self, c1, c2, n=1, shortcut=True, g=1, e=0.5): |
| """Initializes C3 module with options for channel count, bottleneck repetition, shortcut usage, group |
| convolutions, and expansion. |
| """ |
| super().__init__() |
| c_ = int(c2 * e) # hidden channels |
| self.cv1 = Conv(c1, c_, 1, 1) |
| self.cv2 = Conv(c1, c_, 1, 1) |
| self.cv3 = Conv(2 * c_, c2, 1) # optional act=FReLU(c2) |
| self.m = nn.Sequential(*(Bottleneck(c_, c_, shortcut, g, e=1.0) for _ in range(n))) |
| def forward(self, x): |
| """Performs forward propagation using concatenated outputs from two convolutions and a Bottleneck sequence.""" |
| return self.cv3(torch.cat((self.m(self.cv1(x)), self.cv2(x)), 1)) |
| class C3x(C3): |
| """Extends the C3 module with cross-convolutions for enhanced feature extraction in neural networks.""" |
| def __init__(self, c1, c2, n=1, shortcut=True, g=1, e=0.5): |
| """Initializes C3x module with cross-convolutions, extending C3 with customizable channel dimensions, groups, |
| and expansion. |
| """ |
| super().__init__(c1, c2, n, shortcut, g, e) |
| c_ = int(c2 * e) |
| self.m = nn.Sequential(*(CrossConv(c_, c_, 3, 1, g, 1.0, shortcut) for _ in range(n))) |
| class C3TR(C3): |
| """C3 module with TransformerBlock for enhanced feature extraction in object detection models.""" |
| def __init__(self, c1, c2, n=1, shortcut=True, g=1, e=0.5): |
| """Initializes C3 module with TransformerBlock for enhanced feature extraction, accepts channel sizes, shortcut |
| config, group, and expansion. |
| """ |
| super().__init__(c1, c2, n, shortcut, g, e) |
| c_ = int(c2 * e) |
| self.m = TransformerBlock(c_, c_, 4, n) |
| class C3SPP(C3): |
| """Extends the C3 module with an SPP layer for enhanced spatial feature extraction and customizable channels.""" |
| def __init__(self, c1, c2, k=(5, 9, 13), n=1, shortcut=True, g=1, e=0.5): |
| """Initializes a C3 module with SPP layer for advanced spatial feature extraction, given channel sizes, kernel |
| sizes, shortcut, group, and expansion ratio. |
| """ |
| super().__init__(c1, c2, n, shortcut, g, e) |
| c_ = int(c2 * e) |
| self.m = SPP(c_, c_, k) |
| class C3Ghost(C3): |
| """Implements a C3 module with Ghost Bottlenecks for efficient feature extraction in YOLOv5.""" |
| def __init__(self, c1, c2, n=1, shortcut=True, g=1, e=0.5): |
| """Initializes YOLOv5's C3 module with Ghost Bottlenecks for efficient feature extraction.""" |
| super().__init__(c1, c2, n, shortcut, g, e) |
| c_ = int(c2 * e) # hidden channels |
| self.m = nn.Sequential(*(GhostBottleneck(c_, c_) for _ in range(n))) |
| class SPP(nn.Module): |
| """Implements Spatial Pyramid Pooling (SPP) for feature extraction, ref: https://arxiv.org/abs/1406.4729.""" |
| def __init__(self, c1, c2, k=(5, 9, 13)): |
| """Initializes SPP layer with Spatial Pyramid Pooling, ref: https://arxiv.org/abs/1406.4729, args: c1 (input channels), c2 (output channels), k (kernel sizes).""" |
| super().__init__() |
| c_ = c1 // 2 # hidden channels |
| self.cv1 = Conv(c1, c_, 1, 1) |
| self.cv2 = Conv(c_ * (len(k) + 1), c2, 1, 1) |
| self.m = nn.ModuleList([nn.MaxPool2d(kernel_size=x, stride=1, padding=x // 2) for x in k]) |
| def forward(self, x): |
| """Applies convolution and max pooling layers to the input tensor `x`, concatenates results, and returns output |
| tensor. |
| """ |
| x = self.cv1(x) |
| with warnings.catch_warnings(): |
| warnings.simplefilter("ignore") # suppress torch 1.9.0 max_pool2d() warning |
| return self.cv2(torch.cat([x] + [m(x) for m in self.m], 1)) |
| class SPPF(nn.Module): |
| """Implements a fast Spatial Pyramid Pooling (SPPF) layer for efficient feature extraction in YOLOv5 models.""" |
| def __init__(self, c1, c2, k=5): |
| """ |
| Initializes YOLOv5 SPPF layer with given channels and kernel size for YOLOv5 model, combining convolution and |
| max pooling. |
| Equivalent to SPP(k=(5, 9, 13)). |
| """ |
| super().__init__() |
| c_ = c1 // 2 # hidden channels |
| self.cv1 = Conv(c1, c_, 1, 1) |
| self.cv2 = Conv(c_ * 4, c2, 1, 1) |
| self.m = nn.MaxPool2d(kernel_size=k, stride=1, padding=k // 2) |
| def forward(self, x): |
| """Processes input through a series of convolutions and max pooling operations for feature extraction.""" |
| x = self.cv1(x) |
| with warnings.catch_warnings(): |
| warnings.simplefilter("ignore") # suppress torch 1.9.0 max_pool2d() warning |
| y1 = self.m(x) |
| y2 = self.m(y1) |
| return self.cv2(torch.cat((x, y1, y2, self.m(y2)), 1)) |
| class Focus(nn.Module): |
| """Focuses spatial information into channel space using slicing and convolution for efficient feature extraction.""" |
| def __init__(self, c1, c2, k=1, s=1, p=None, g=1, act=True): |
| """Initializes Focus module to concentrate width-height info into channel space with configurable convolution |
| parameters. |
| """ |
| super().__init__() |
| self.conv = Conv(c1 * 4, c2, k, s, p, g, act=act) |
| # self.contract = Contract(gain=2) |
| def forward(self, x): |
| """Processes input through Focus mechanism, reshaping (b,c,w,h) to (b,4c,w/2,h/2) then applies convolution.""" |
| return self.conv(torch.cat((x[..., ::2, ::2], x[..., 1::2, ::2], x[..., ::2, 1::2], x[..., 1::2, 1::2]), 1)) |
| # return self.conv(self.contract(x)) |
| class GhostConv(nn.Module): |
| """Implements Ghost Convolution for efficient feature extraction, see https://github.com/huawei-noah/ghostnet.""" |
| def __init__(self, c1, c2, k=1, s=1, g=1, act=True): |
| """Initializes GhostConv with in/out channels, kernel size, stride, groups, and activation; halves out channels |
| for efficiency. |
| """ |
| super().__init__() |
| c_ = c2 // 2 # hidden channels |
| self.cv1 = Conv(c1, c_, k, s, None, g, act=act) |
| self.cv2 = Conv(c_, c_, 5, 1, None, c_, act=act) |
| def forward(self, x): |
| """Performs forward pass, concatenating outputs of two convolutions on input `x`: shape (B,C,H,W).""" |
| y = self.cv1(x) |
| return torch.cat((y, self.cv2(y)), 1) |
| class GhostBottleneck(nn.Module): |
| """Efficient bottleneck layer using Ghost Convolutions, see https://github.com/huawei-noah/ghostnet.""" |
| def __init__(self, c1, c2, k=3, s=1): |
| """Initializes GhostBottleneck with ch_in `c1`, ch_out `c2`, kernel size `k`, stride `s`; see https://github.com/huawei-noah/ghostnet.""" |
| super().__init__() |
| c_ = c2 // 2 |
| self.conv = nn.Sequential( |
| GhostConv(c1, c_, 1, 1), # pw |
| DWConv(c_, c_, k, s, act=False) if s == 2 else nn.Identity(), # dw |
| GhostConv(c_, c2, 1, 1, act=False), |
| ) # pw-linear |
| self.shortcut = ( |
| nn.Sequential(DWConv(c1, c1, k, s, act=False), Conv(c1, c2, 1, 1, act=False)) if s == 2 else nn.Identity() |
| ) |
| def forward(self, x): |
| """Processes input through conv and shortcut layers, returning their summed output.""" |
| return self.conv(x) + self.shortcut(x) |
| class Contract(nn.Module): |
| """Contracts spatial dimensions into channel dimensions for efficient processing in neural networks.""" |
| def __init__(self, gain=2): |
| """Initializes a layer to contract spatial dimensions (width-height) into channels, e.g., input shape |
| (1,64,80,80) to (1,256,40,40). |
| """ |
| super().__init__() |
| self.gain = gain |
| def forward(self, x): |
| """Processes input tensor to expand channel dimensions by contracting spatial dimensions, yielding output shape |
| `(b, c*s*s, h//s, w//s)`. |
| """ |
| b, c, h, w = x.size() # assert (h / s == 0) and (W / s == 0), 'Indivisible gain' |
| s = self.gain |
| x = x.view(b, c, h // s, s, w // s, s) # x(1,64,40,2,40,2) |
| x = x.permute(0, 3, 5, 1, 2, 4).contiguous() # x(1,2,2,64,40,40) |
| return x.view(b, c * s * s, h // s, w // s) # x(1,256,40,40) |
| class Expand(nn.Module): |
| """Expands spatial dimensions by redistributing channels, e.g., from (1,64,80,80) to (1,16,160,160).""" |
| def __init__(self, gain=2): |
| """ |
| Initializes the Expand module to increase spatial dimensions by redistributing channels, with an optional gain |
| factor. |
| Example: x(1,64,80,80) to x(1,16,160,160). |
| """ |
| super().__init__() |
| self.gain = gain |
| def forward(self, x): |
| """Processes input tensor x to expand spatial dimensions by redistributing channels, requiring C / gain^2 == |
| 0 |
| """ |
| b, c, h, w = x.size() # assert C / s ** 2 == 0, 'Indivisible gain' |
| s = self.gain |
| x = x.view(b, s, s, c // s**2, h, w) # x(1,2,2,16,80,80) |
| x = x.permute(0, 3, 4, 1, 5, 2).contiguous() # x(1,16,80,2,80,2) |
| return x.view(b, c // s**2, h * s, w * s) # x(1,16,160,160) |
| class Concat(nn.Module): |
| """Concatenates tensors along a specified dimension for efficient tensor manipulation in neural networks.""" |
| def __init__(self, dimension=1): |
| """Initializes a Concat module to concatenate tensors along a specified dimension.""" |
| super().__init__() |
| self.d = dimension |
| def forward(self, x): |
| """Concatenates a list of tensors along a specified dimension; `x` is a list of tensors, `dimension` is an |
| int. |
| """ |
| return torch.cat(x, self.d) |
| class DetectMultiBackend(nn.Module): |
| """YOLOv5 MultiBackend class for inference on various backends including PyTorch, ONNX, TensorRT, and more.""" |
| def __init__(self, weights="yolov5s.pt", device=torch.device("cpu"), dnn=False, data=None, fp16=False, fuse=True, |
| openvino=None): |
| """Initializes DetectMultiBackend with support for various inference backends, including PyTorch and ONNX.""" |
| # PyTorch: weights = *.pt |
| # TorchScript: *.torchscript |
| # ONNX Runtime: *.onnx |
| # ONNX OpenCV DNN: *.onnx --dnn |
| # OpenVINO: *_openvino_model |
| # CoreML: *.mlpackage |
| # TensorRT: *.engine |
| # TensorFlow SavedModel: *_saved_model |
| # TensorFlow GraphDef: *.pb |
| # TensorFlow Lite: *.tflite |
| # TensorFlow Edge TPU: *_edgetpu.tflite |
| # PaddlePaddle: *_paddle_model |
| from models.experimental import attempt_download, attempt_load # scoped to avoid circular import |
| super().__init__() |
| w = str(weights[0] if isinstance(weights, list) else weights) |
| pt, jit, onnx, xml, engine, coreml, saved_model, pb, tflite, edgetpu, tfjs, paddle, triton = self._model_type(w) |
| fp16 &= pt or jit or onnx or engine or triton # FP16 |
| nhwc = coreml or saved_model or pb or tflite or edgetpu # BHWC formats (vs torch BCWH) |
| stride = 32 # default stride |
| cuda = torch.cuda.is_available() and device.type != "cpu" # use CUDA |
| if not (pt or triton): |
| w = attempt_download(w) # download if not local |
| if pt: # PyTorch |
| model = attempt_load(weights if isinstance(weights, list) else w, device=device, inplace=True, fuse=fuse) |
| stride = max(int(model.stride.max()), 32) # model stride |
| names = model.module.names if hasattr(model, "module") else model.names # get class names |
| model.half() if fp16 else model.float() |
| self.model = model # explicitly assign for to(), cpu(), cuda(), half() |
| elif jit: # TorchScript |
| LOGGER.info(f"Loading {w} for TorchScript inference...") |
| extra_files = {"config.txt": ""} # model metadata |
| model = torch.jit.load(w, _extra_files=extra_files, map_location=device) |
| model.half() if fp16 else model.float() |
| if extra_files["config.txt"]: # load metadata dict |
| d = json.loads( |
| extra_files["config.txt"], |
| object_hook=lambda d: {int(k) if k.isdigit() else k: v for k, v in d.items()}, |
| ) |
| stride, names = int(d["stride"]), d["names"] |
| elif dnn: # ONNX OpenCV DNN |
| LOGGER.info(f"Loading {w} for ONNX OpenCV DNN inference...") |
| check_requirements("opencv-python>=4.5.4") |
| net = cv2.dnn.readNetFromONNX(w) |
| elif onnx: # ONNX Runtime |
| LOGGER.info(f"Loading {w} for ONNX Runtime inference...") |
| check_requirements(("onnx", "onnxruntime-gpu" if cuda else "onnxruntime")) |
| import onnxruntime |
| providers = ["CUDAExecutionProvider", "CPUExecutionProvider"] if cuda else ["CPUExecutionProvider"] |
| session = onnxruntime.InferenceSession(w, providers=providers) |
| output_names = [x.name for x in session.get_outputs()] |
| meta = session.get_modelmeta().custom_metadata_map # metadata |
| if "stride" in meta: |
| stride, names = int(meta["stride"]), eval(meta["names"]) |
| elif xml: # OpenVINO |
| LOGGER.info(f"Loading {w} for OpenVINO inference...") |
| check_requirements("openvino>=2023.0") # requires openvino-dev: https://pypi.org/project/openvino-dev/ |
| from openvino.runtime import Core, Layout, get_batch |
| core = Core() |
| if not Path(w).is_file(): # if not *.xml |
| w = next(Path(w).glob("*.xml")) # get *.xml file from *_openvino_model dir |
| ov_model = core.read_model(model=w, weights=Path(w).with_suffix(".bin")) |
| if ov_model.get_parameters()[0].get_layout().empty: |
| ov_model.get_parameters()[0].set_layout(Layout("NCHW")) |
| batch_dim = get_batch(ov_model) |
| if batch_dim.is_static: |
| batch_size = batch_dim.get_length() |
| ov_compiled_model = core.compile_model(ov_model, device_name="AUTO") # AUTO selects best available device |
| stride, names = self._load_metadata(Path(w).with_suffix(".yaml")) # load metadata |
| elif engine: # TensorRT |
| LOGGER.info(f"Loading {w} for TensorRT inference...") |
| import tensorrt as trt # https://developer.nvidia.com/nvidia-tensorrt-download |
| check_version(trt.__version__, "7.0.0", hard=True) # require tensorrt>=7.0.0 |
| if device.type == "cpu": |
| device = torch.device("cuda:0") |
| Binding = namedtuple("Binding", ("name", "dtype", "shape", "data", "ptr")) |
| logger = trt.Logger(trt.Logger.INFO) |
| with open(w, "rb") as f, trt.Runtime(logger) as runtime: |
| model = runtime.deserialize_cuda_engine(f.read()) |
| context = model.create_execution_context() |
| bindings = OrderedDict() |
| output_names = [] |
| fp16 = False # default updated below |
| dynamic = False |
| is_trt10 = not hasattr(model, "num_bindings") |
| num = range(model.num_io_tensors) if is_trt10 else range(model.num_bindings) |
| for i in num: |
| if is_trt10: |
| name = model.get_tensor_name(i) |
| dtype = trt.nptype(model.get_tensor_dtype(name)) |
| is_input = model.get_tensor_mode(name) == trt.TensorIOMode.INPUT |
| if is_input: |
| if -1 in tuple(model.get_tensor_shape(name)): # dynamic |
| dynamic = True |
| context.set_input_shape(name, tuple(model.get_profile_shape(name, 0)[2])) |
| if dtype == np.float16: |
| fp16 = True |
| else: # output |
| output_names.append(name) |
| shape = tuple(context.get_tensor_shape(name)) |
| else: |
| name = model.get_binding_name(i) |
| dtype = trt.nptype(model.get_binding_dtype(i)) |
| if model.binding_is_input(i): |
| if -1 in tuple(model.get_binding_shape(i)): # dynamic |
| dynamic = True |
| context.set_binding_shape(i, tuple(model.get_profile_shape(0, i)[2])) |
| if dtype == np.float16: |
| fp16 = True |
| else: # output |
| output_names.append(name) |
| shape = tuple(context.get_binding_shape(i)) |
| im = torch.from_numpy(np.empty(shape, dtype=dtype)).to(device) |
| bindings[name] = Binding(name, dtype, shape, im, int(im.data_ptr())) |
| binding_addrs = OrderedDict((n, d.ptr) for n, d in bindings.items()) |
| batch_size = bindings["images"].shape[0] # if dynamic, this is instead max batch size |
| elif coreml: # CoreML |
| LOGGER.info(f"Loading {w} for CoreML inference...") |
| import coremltools as ct |
| model = ct.models.MLModel(w) |
| elif saved_model: # TF SavedModel |
| LOGGER.info(f"Loading {w} for TensorFlow SavedModel inference...") |
| import tensorflow as tf |
| keras = False # assume TF1 saved_model |
| model = tf.keras.models.load_model(w) if keras else tf.saved_model.load(w) |
| elif pb: # GraphDef https://www.tensorflow.org/guide/migrate#a_graphpb_or_graphpbtxt |
| LOGGER.info(f"Loading {w} for TensorFlow GraphDef inference...") |
| import tensorflow as tf |
| def wrap_frozen_graph(gd, inputs, outputs): |
| """Wraps a TensorFlow GraphDef for inference, returning a pruned function.""" |
| x = tf.compat.v1.wrap_function(lambda: tf.compat.v1.import_graph_def(gd, name=""), []) # wrapped |
| ge = x.graph.as_graph_element |
| return x.prune(tf.nest.map_structure(ge, inputs), tf.nest.map_structure(ge, outputs)) |
| def gd_outputs(gd): |
| """Generates a sorted list of graph outputs excluding NoOp nodes and inputs, formatted as '<name>:0'.""" |
| name_list, input_list = [], [] |
| for node in gd.node: # tensorflow.core.framework.node_def_pb2.NodeDef |
| name_list.append(node.name) |
| input_list.extend(node.input) |
| return sorted(f"{x}:0" for x in list(set(name_list) - set(input_list)) if not x.startswith("NoOp")) |
| gd = tf.Graph().as_graph_def() # TF GraphDef |
| with open(w, "rb") as f: |
| gd.ParseFromString(f.read()) |
| frozen_func = wrap_frozen_graph(gd, inputs="x:0", outputs=gd_outputs(gd)) |
| elif tflite or edgetpu: # https://www.tensorflow.org/lite/guide/python#install_tensorflow_lite_for_python |
| try: # https://coral.ai/docs/edgetpu/tflite-python/#update-existing-tf-lite-code-for-the-edge-tpu |
| from tflite_runtime.interpreter import Interpreter, load_delegate |
| except ImportError: |
| import tensorflow as tf |
| Interpreter, load_delegate = ( |
| tf.lite.Interpreter, |
| tf.lite.experimental.load_delegate, |
| ) |
| if edgetpu: # TF Edge TPU https://coral.ai/software/#edgetpu-runtime |
| LOGGER.info(f"Loading {w} for TensorFlow Lite Edge TPU inference...") |
| delegate = {"Linux": "libedgetpu.so.1", "Darwin": "libedgetpu.1.dylib", "Windows": "edgetpu.dll"}[ |
| platform.system() |
| ] |
| interpreter = Interpreter(model_path=w, experimental_delegates=[load_delegate(delegate)]) |
| else: # TFLite |
| LOGGER.info(f"Loading {w} for TensorFlow Lite inference...") |
| interpreter = Interpreter(model_path=w) # load TFLite model |
| interpreter.allocate_tensors() # allocate |
| input_details = interpreter.get_input_details() # inputs |
| output_details = interpreter.get_output_details() # outputs |
| # load metadata |
| with contextlib.suppress(zipfile.BadZipFile): |
| with zipfile.ZipFile(w, "r") as model: |
| meta_file = model.namelist()[0] |
| meta = ast.literal_eval(model.read(meta_file).decode("utf-8")) |
| stride, names = int(meta["stride"]), meta["names"] |
| elif tfjs: # TF.js |
| raise NotImplementedError("ERROR: YOLOv5 TF.js inference is not supported") |
| elif paddle: # PaddlePaddle |
| LOGGER.info(f"Loading {w} for PaddlePaddle inference...") |
| check_requirements("paddlepaddle-gpu" if cuda else "paddlepaddle") |
| import paddle.inference as pdi |
| if not Path(w).is_file(): # if not *.pdmodel |
| w = next(Path(w).rglob("*.pdmodel")) # get *.pdmodel file from *_paddle_model dir |
| weights = Path(w).with_suffix(".pdiparams") |
| config = pdi.Config(str(w), str(weights)) |
| if cuda: |
| config.enable_use_gpu(memory_pool_init_size_mb=2048, device_id=0) |
| predictor = pdi.create_predictor(config) |
| input_handle = predictor.get_input_handle(predictor.get_input_names()[0]) |
| output_names = predictor.get_output_names() |
| elif triton: # NVIDIA Triton Inference Server |
| LOGGER.info(f"Using {w} as Triton Inference Server...") |
| check_requirements("tritonclient[all]") |
| from utils.triton import TritonRemoteModel |
| model = TritonRemoteModel(url=w) |
| nhwc = model.runtime.startswith("tensorflow") |
| else: |
| raise NotImplementedError(f"ERROR: {w} is not a supported format") |
| # class names |
| if "names" not in locals(): |
| names = yaml_load(data)["names"] if data else {i: f"class{i}" for i in range(999)} |
| if names[0] == "n01440764" and len(names) == 1000: # ImageNet |
| names = yaml_load(ROOT / "data/ImageNet.yaml")["names"] # human-readable names |
| self.__dict__.update(locals()) # assign all variables to self |
| def forward(self, im, augment=False, visualize=False): |
| """Performs YOLOv5 inference on input images with options for augmentation and visualization.""" |
| b, ch, h, w = im.shape # batch, channel, height, width |
| if self.fp16 and im.dtype != torch.float16: |
| im = im.half() # to FP16 |
| if self.nhwc: |
| im = im.permute(0, 2, 3, 1) # torch BCHW to numpy BHWC shape(1,320,192,3) |
| if self.pt: # PyTorch |
| y = self.model(im, augment=augment, visualize=visualize) if augment or visualize else self.model(im) |
| elif self.jit: # TorchScript |
| y = self.model(im) |
| elif self.dnn: # ONNX OpenCV DNN |
| im = im.cpu().numpy() # torch to numpy |
| self.net.setInput(im) |
| y = self.net.forward() |
| elif self.onnx: # ONNX Runtime |
| im = im.cpu().numpy() # torch to numpy |
| y = self.session.run(self.output_names, {self.session.get_inputs()[0].name: im}) |
| elif self.xml: # OpenVINO |
| im = im.cpu().numpy() # FP32 |
| y = list(self.ov_compiled_model(im).values()) |
| elif self.engine: # TensorRT |
| if self.dynamic and im.shape != self.bindings["images"].shape: |
| i = self.model.get_binding_index("images") |
| self.context.set_binding_shape(i, im.shape) # reshape if dynamic |
| self.bindings["images"] = self.bindings["images"]._replace(shape=im.shape) |
| for name in self.output_names: |
| i = self.model.get_binding_index(name) |
| self.bindings[name].data.resize_(tuple(self.context.get_binding_shape(i))) |
| s = self.bindings["images"].shape |
| assert im.shape == s, f"input size {im.shape} {'>' if self.dynamic else 'not equal to'} max model size {s}" |
| self.binding_addrs["images"] = int(im.data_ptr()) |
| self.context.execute_v2(list(self.binding_addrs.values())) |
| y = [self.bindings[x].data for x in sorted(self.output_names)] |
| elif self.coreml: # CoreML |
| im = im.cpu().numpy() |
| im = Image.fromarray((im[0] * 255).astype("uint8")) |
| # im = im.resize((192, 320), Image.BILINEAR) |
| y = self.model.predict({"image": im}) # coordinates are xywh normalized |
| if "confidence" in y: |
| box = xywh2xyxy(y["coordinates"] * [[w, h, w, h]]) # xyxy pixels |
| conf, cls = y["confidence"].max(1), y["confidence"].argmax(1).astype(np.float) |
| y = np.concatenate((box, conf.reshape(-1, 1), cls.reshape(-1, 1)), 1) |
| else: |
| y = list(reversed(y.values())) # reversed for segmentation models (pred, proto) |
| elif self.paddle: # PaddlePaddle |
| im = im.cpu().numpy().astype(np.float32) |
| self.input_handle.copy_from_cpu(im) |
| self.predictor.run() |
| y = [self.predictor.get_output_handle(x).copy_to_cpu() for x in self.output_names] |
| elif self.triton: # NVIDIA Triton Inference Server |
| y = self.model(im) |
| else: # TensorFlow (SavedModel, GraphDef, Lite, Edge TPU) |
| im = im.cpu().numpy() |
| if self.saved_model: # SavedModel |
| y = self.model(im, training=False) if self.keras else self.model(im) |
| elif self.pb: # GraphDef |
| y = self.frozen_func(x=self.tf.constant(im)) |
| else: # Lite or Edge TPU |
| input = self.input_details[0] |
| int8 = input["dtype"] == np.uint8 # is TFLite quantized uint8 model |
| if int8: |
| scale, zero_point = input["quantization"] |
| im = (im / scale + zero_point).astype(np.uint8) # de-scale |
| self.interpreter.set_tensor(input["index"], im) |
| self.interpreter.invoke() |
| y = [] |
| for output in self.output_details: |
| x = self.interpreter.get_tensor(output["index"]) |
| if int8: |
| scale, zero_point = output["quantization"] |
| x = (x.astype(np.float32) - zero_point) * scale # re-scale |
| y.append(x) |
| y = [x if isinstance(x, np.ndarray) else x.numpy() for x in y] |
| y[0][..., :4] *= [w, h, w, h] # xywh normalized to pixels |
| if isinstance(y, (list, tuple)): |
| return self.from_numpy(y[0]) if len(y) == 1 else [self.from_numpy(x) for x in y] |
| else: |
| return self.from_numpy(y) |
| def from_numpy(self, x): |
| """Converts a NumPy array to a torch tensor, maintaining device compatibility.""" |
| return torch.from_numpy(x).to(self.device) if isinstance(x, np.ndarray) else x |
| def warmup(self, imgsz=(1, 3, 640, 640)): |
| """Performs a single inference warmup to initialize model weights, accepting an `imgsz` tuple for image size.""" |
| warmup_types = self.pt, self.jit, self.onnx, self.engine, self.saved_model, self.pb, self.triton |
| if any(warmup_types) and (self.device.type != "cpu" or self.triton): |
| im = torch.empty(*imgsz, dtype=torch.half if self.fp16 else torch.float, device=self.device) # input |
| for _ in range(2 if self.jit else 1): # |
| self.forward(im) # warmup |
| @staticmethod |
| def _model_type(p="path/to/model.pt"): |
| """ |
| Determines model type from file path or URL, supporting various export formats. |
| Example: path='path/to/model.onnx' -> type=onnx |
| """ |
| # types = [pt, jit, onnx, xml, engine, coreml, saved_model, pb, tflite, edgetpu, tfjs, paddle] |
| from export import export_formats |
| from utils.downloads import is_url |
| sf = list(export_formats().Suffix) # export suffixes |
| if not is_url(p, check=False): |
| check_suffix(p, sf) # checks |
| url = urlparse(p) # if url may be Triton inference server |
| types = [s in Path(p).name for s in sf] |
| types[8] &= not types[9] # tflite &= not edgetpu |
| triton = not any(types) and all([any(s in url.scheme for s in ["http", "grpc"]), url.netloc]) |
| return types + [triton] |
| @staticmethod |
| def _load_metadata(f=Path("path/to/meta.yaml")): |
| """Loads metadata from a YAML file, returning strides and names if the file exists, otherwise `None`.""" |
| if f.exists(): |
| d = yaml_load(f) |
| return d["stride"], d["names"] # assign stride, names |
| return None, None |
| class AutoShape(nn.Module): |
| """AutoShape class for robust YOLOv5 inference with preprocessing, NMS, and support for various input formats.""" |
| conf = 0.25 # NMS confidence threshold |
| iou = 0.45 # NMS IoU threshold |
| agnostic = False # NMS class-agnostic |
| multi_label = False # NMS multiple labels per box |
| classes = None # (optional list) filter by class, i.e. = [0, 15, 16] for COCO persons, cats and dogs |
| max_det = 1000 # maximum number of detections per image |
| amp = False # Automatic Mixed Precision (AMP) inference |
| def __init__(self, model, verbose=True): |
| """Initializes YOLOv5 model for inference, setting up attributes and preparing model for evaluation.""" |
| super().__init__() |
| if verbose: |
| LOGGER.info("Adding AutoShape... ") |
| copy_attr(self, model, include=("yaml", "nc", "hyp", "names", "stride", "abc"), exclude=()) # copy attributes |
| self.dmb = isinstance(model, DetectMultiBackend) # DetectMultiBackend() instance |
| self.pt = not self.dmb or model.pt # PyTorch model |
| self.model = model.eval() |
| if self.pt: |
| m = self.model.model.model[-1] if self.dmb else self.model.model[-1] # Detect() |
| m.inplace = False # Detect.inplace=False for safe multithread inference |
| m.export = True # do not output loss values |
| def _apply(self, fn): |
| """ |
| Applies to(), cpu(), cuda(), half() etc. |
| to model tensors excluding parameters or registered buffers. |
| """ |
| self = super()._apply(fn) |
| if self.pt: |
| m = self.model.model.model[-1] if self.dmb else self.model.model[-1] # Detect() |
| m.stride = fn(m.stride) |
| m.grid = list(map(fn, m.grid)) |
| if isinstance(m.anchor_grid, list): |
| m.anchor_grid = list(map(fn, m.anchor_grid)) |
| return self |
| @smart_inference_mode() |
| def forward(self, ims, size=640, augment=False, profile=False): |
| """ |
| Performs inference on inputs with optional augment & profiling. |
| Supports various formats including file, URI, OpenCV, PIL, numpy, torch. |
| """ |
| # For size(height=640, width=1280), RGB images example inputs are: |
| # file: ims = 'data/images/zidane.jpg' # str or PosixPath |
| # URI: = 'https://ultralytics.com/images/zidane.jpg' |
| # OpenCV: = cv2.imread('image.jpg')[:,:,::-1] # HWC BGR to RGB x(640,1280,3) |
| # PIL: = Image.open('image.jpg') or ImageGrab.grab() # HWC x(640,1280,3) |
| # numpy: = np.zeros((640,1280,3)) # HWC |
| # torch: = torch.zeros(16,3,320,640) # BCHW (scaled to size=640, 0-1 values) |
| # multiple: = [Image.open('image1.jpg'), Image.open('image2.jpg'), ...] # list of images |
| dt = (Profile(), Profile(), Profile()) |
| with dt[0]: |
| if isinstance(size, int): # expand |
| size = (size, size) |
| p = next(self.model.parameters()) if self.pt else torch.empty(1, device=self.model.device) # param |
| autocast = self.amp and (p.device.type != "cpu") # Automatic Mixed Precision (AMP) inference |
| if isinstance(ims, torch.Tensor): # torch |
| with amp.autocast(autocast): |
| return self.model(ims.to(p.device).type_as(p), augment=augment) # inference |
| # Pre-process |
| n, ims = (len(ims), list(ims)) if isinstance(ims, (list, tuple)) else (1, [ims]) # number, list of images |
| shape0, shape1, files = [], [], [] # image and inference shapes, filenames |
| for i, im in enumerate(ims): |
| f = f"image{i}" # filename |
| if isinstance(im, (str, Path)): # filename or uri |
| im, f = Image.open(requests.get(im, stream=True).raw if str(im).startswith("http") else im), im |
| im = np.asarray(exif_transpose(im)) |
| elif isinstance(im, Image.Image): # PIL Image |
| im, f = np.asarray(exif_transpose(im)), getattr(im, "filename", f) or f |
| files.append(Path(f).with_suffix(".jpg").name) |
| if im.shape[0] < 5: # image in CHW |
| im = im.transpose((1, 2, 0)) # reverse dataloader .transpose(2, 0, 1) |
| im = im[..., :3] if im.ndim == 3 else cv2.cvtColor(im, cv2.COLOR_GRAY2BGR) # enforce 3ch input |
| s = im.shape[:2] # HWC |
| shape0.append(s) # image shape |
| g = max(size) / max(s) # gain |
| shape1.append([int(y * g) for y in s]) |
| ims[i] = im if im.data.contiguous else np.ascontiguousarray(im) # update |
| shape1 = [make_divisible(x, self.stride) for x in np.array(shape1).max(0)] # inf shape |
| x = [letterbox(im, shape1, auto=False)[0] for im in ims] # pad |
| x = np.ascontiguousarray(np.array(x).transpose((0, 3, 1, 2))) # stack and BHWC to BCHW |
| x = torch.from_numpy(x).to(p.device).type_as(p) / 255 # uint8 to fp16/32 |
| with amp.autocast(autocast): |
| # Inference |
| with dt[1]: |
| y = self.model(x, augment=augment) # forward |
| # Post-process |
| with dt[2]: |
| y = non_max_suppression( |
| y if self.dmb else y[0], |
| self.conf, |
| self.iou, |
| self.classes, |
| self.agnostic, |
| self.multi_label, |
| max_det=self.max_det, |
| ) # NMS |
| for i in range(n): |
| scale_boxes(shape1, y[i][:, :4], shape0[i]) |
| return Detections(ims, y, files, dt, self.names, x.shape) |
| class Detections: |
| """Manages YOLOv5 detection results with methods for visualization, saving, cropping, and exporting detections.""" |
| def __init__(self, ims, pred, files, times=(0, 0, 0), names=None, shape=None): |
| """Initializes the YOLOv5 Detections class with image info, predictions, filenames, timing and normalization.""" |
| super().__init__() |
| d = pred[0].device # device |
| gn = [torch.tensor([*(im.shape[i] for i in [1, 0, 1, 0]), 1, 1], device=d) for im in ims] # normalizations |
| self.ims = ims # list of images as numpy arrays |
| self.pred = pred # list of tensors pred[0] = (xyxy, conf, cls) |
| self.names = names # class names |
| self.files = files # image filenames |
| self.times = times # profiling times |
| self.xyxy = pred # xyxy pixels |
| self.xywh = [xyxy2xywh(x) for x in pred] # xywh pixels |
| self.xyxyn = [x / g for x, g in zip(self.xyxy, gn)] # xyxy normalized |
| self.xywhn = [x / g for x, g in zip(self.xywh, gn)] # xywh normalized |
| self.n = len(self.pred) # number of images (batch size) |
| self.t = tuple(x.t / self.n * 1e3 for x in times) # timestamps (ms) |
| self.s = tuple(shape) # inference BCHW shape |
| def _run(self, pprint=False, show=False, save=False, crop=False, render=False, labels=True, save_dir=Path("")): |
| """Executes model predictions, displaying and/or saving outputs with optional crops and labels.""" |
| s, crops = "", [] |
| for i, (im, pred) in enumerate(zip(self.ims, self.pred)): |
| s += f"\nimage {i + 1}/{len(self.pred)}: {im.shape[0]}x{im.shape[1]} " # string |
| if pred.shape[0]: |
| for c in pred[:, -1].unique(): |
| n = (pred[:, -1] == c).sum() # detections per class |
| s += f"{n} {self.names[int(c)]}{'s' * (n > 1)}, " # add to string |
| s = s.rstrip(", ") |
| if show or save or render or crop: |
| annotator = Annotator(im, example=str(self.names)) |
| for *box, conf, cls in reversed(pred): # xyxy, confidence, class |
| label = f"{self.names[int(cls)]} {conf:.2f}" |
| if crop: |
| file = save_dir / "crops" / self.names[int(cls)] / self.files[i] if save else None |
| crops.append( |
| { |
| "box": box, |
| "conf": conf, |
| "cls": cls, |
| "label": label, |
| "im": save_one_box(box, im, file=file, save=save), |
| } |
| ) |
| else: # all others |
| annotator.box_label(box, label if labels else "", color=colors(cls)) |
| im = annotator.im |
| else: |
| s += "(no detections)" |
| im = Image.fromarray(im.astype(np.uint8)) if isinstance(im, np.ndarray) else im # from np |
| if show: |
| if is_jupyter(): |
| from IPython.display import display |
| display(im) |
| else: |
| im.show(self.files[i]) |
| if save: |
| f = self.files[i] |
| im.save(save_dir / f) # save |
| if i == self.n - 1: |
| LOGGER.info(f"Saved {self.n} image{'s' * (self.n > 1)} to {colorstr('bold', save_dir)}") |
| if render: |
| self.ims[i] = np.asarray(im) |
| if pprint: |
| s = s.lstrip("\n") |
| return f"{s}\nSpeed: %.1fms pre-process, %.1fms inference, %.1fms NMS per image at shape {self.s}" % self.t |
| if crop: |
| if save: |
| LOGGER.info(f"Saved results to {save_dir}\n") |
| return crops |
| @TryExcept("Showing images is not supported in this environment") |
| def show(self, labels=True): |
| """ |
| Displays detection results with optional labels. |
| Usage: show(labels=True) |
| """ |
| self._run(show=True, labels=labels) # show results |
| def save(self, labels=True, save_dir="runs/detect/exp", exist_ok=False): |
| """ |
| Saves detection results with optional labels to a specified directory. |
| Usage: save(labels=True, save_dir='runs/detect/exp', exist_ok=False) |
| """ |
| save_dir = increment_path(save_dir, exist_ok, mkdir=True) # increment save_dir |
| self._run(save=True, labels=labels, save_dir=save_dir) # save results |
| def crop(self, save=True, save_dir="runs/detect/exp", exist_ok=False): |
| """ |
| Crops detection results, optionally saves them to a directory. |
| Args: save (bool), save_dir (str), exist_ok (bool). |
| """ |
| save_dir = increment_path(save_dir, exist_ok, mkdir=True) if save else None |
| return self._run(crop=True, save=save, save_dir=save_dir) # crop results |
| def render(self, labels=True): |
| """Renders detection results with optional labels on images; args: labels (bool) indicating label inclusion.""" |
| self._run(render=True, labels=labels) # render results |
| return self.ims |
| def pandas(self): |
| """ |
| Returns detections as pandas DataFrames for various box formats (xyxy, xyxyn, xywh, xywhn). |
| Example: print(results.pandas().xyxy[0]). |
| """ |
| new = copy(self) # return copy |
| ca = "xmin", "ymin", "xmax", "ymax", "confidence", "class", "name" # xyxy columns |
| cb = "xcenter", "ycenter", "width", "height", "confidence", "class", "name" # xywh columns |
| for k, c in zip(["xyxy", "xyxyn", "xywh", "xywhn"], [ca, ca, cb, cb]): |
| a = [[x[:5] + [int(x[5]), self.names[int(x[5])]] for x in x.tolist()] for x in getattr(self, k)] # update |
| setattr(new, k, [pd.DataFrame(x, columns=c) for x in a]) |
| return new |
| def tolist(self): |
| """ |
| Converts a Detections object into a list of individual detection results for iteration. |
| Example: for result in results.tolist(): |
| """ |
| r = range(self.n) # iterable |
| return [ |
| Detections( |
| [self.ims[i]], |
| [self.pred[i]], |
| [self.files[i]], |
| self.times, |
| self.names, |
| self.s, |
| ) |
| for i in r |
| ] |
| def print(self): |
| """Logs the string representation of the current object's state via the LOGGER.""" |
| LOGGER.info(self.__str__()) |
| def __len__(self): |
| """Returns the number of results stored, overrides the default len(results).""" |
| return self.n |
| def __str__(self): |
| """Returns a string representation of the model's results, suitable for printing, overrides default |
| print(results). |
| """ |
| return self._run(pprint=True) # print results |
| def __repr__(self): |
| """Returns a string representation of the YOLOv5 object, including its class and formatted results.""" |
| return f"YOLOv5 {self.__class__} instance\n" + self.__str__() |
| class Proto(nn.Module): |
| """YOLOv5 mask Proto module for segmentation models, performing convolutions and upsampling on input tensors.""" |
| def __init__(self, c1, c_=256, c2=32): |
| """Initializes YOLOv5 Proto module for segmentation with input, proto, and mask channels configuration.""" |
| super().__init__() |
| self.cv1 = Conv(c1, c_, k=3) |
| self.upsample = nn.Upsample(scale_factor=2, mode="nearest") |
| self.cv2 = Conv(c_, c_, k=3) |
| self.cv3 = Conv(c_, c2) |
| def forward(self, x): |
| """Performs a forward pass using convolutional layers and upsampling on input tensor `x`.""" |
| return self.cv3(self.cv2(self.upsample(self.cv1(x)))) |
| class Classify(nn.Module): |
| """YOLOv5 classification head with convolution, pooling, and dropout layers for channel transformation.""" |
| def __init__( |
| self, c1, c2, k=1, s=1, p=None, g=1, dropout_p=0.0 |
| ): # ch_in, ch_out, kernel, stride, padding, groups, dropout probability |
| """Initializes YOLOv5 classification head with convolution, pooling, and dropout layers for input to output |
| channel transformation. |
| """ |
| super().__init__() |
| c_ = 1280 # efficientnet_b0 size |
| self.conv = Conv(c1, c_, k, s, autopad(k, p), g) |
| self.pool = nn.AdaptiveAvgPool2d(1) # to x(b,c_,1,1) |
| self.drop = nn.Dropout(p=dropout_p, inplace=True) |
| self.linear = nn.Linear(c_, c2) # to x(b,c2) |
| def forward(self, x): |
| """Processes input through conv, pool, drop, and linear layers; supports list concatenation input.""" |
| if isinstance(x, list): |
| x = torch.cat(x, 1) |
| return self.linear(self.drop(self.pool(self.conv(x)).flatten(1))) |
| class SE(nn.Module): |
| def __init__(self,c1,c2,r=16): |
| super(SE,self).__init__() |
| self.avgpool = nn.AdaptiveAvgPool2d(1) |
| self.l1 = nn.Linear(c1,c1 //r,bias=False) |
| self.relu = nn.ReLU(inplace=True) |
| self.l2 = nn.Linear(c1 // r,c1,bias=False) |
| self.sig = nn.Sigmoid() |
| def forward(self,x): |
| print(x.size()) |
| b,c,_,_=x.size() |
| y = self.avgpool(x).view(b,c) |
| y = self.l1(y) |
| y = self.relu(y) |
| y = self.l2(y) |
| y = self.sig(y) |
| y = y.view(b,c,1,1) |
| return x*y.expand_as(x) |
| # CA |
| class h_sigmoid(nn.Module): |
| def __init__(self, inplace=True): |
| super(h_sigmoid, self).__init__() |
| self.relu = nn.ReLU6(inplace=inplace) |
| def forward(self, x): |
| return self.relu(x + 3) / 6 |
| class h_swish(nn.Module): |
| def __init__(self, inplace=True): |
| super(h_swish, self).__init__() |
| self.sigmoid = h_sigmoid(inplace=inplace) |
| def forward(self, x): |
| return x * self.sigmoid(x) |
| class CoordAtt(nn.Module): |
| def __init__(self, inp, oup, reduction=32): |
| super(CoordAtt, self).__init__() |
| self.pool_h = nn.AdaptiveAvgPool2d((None, 1)) |
| self.pool_w = nn.AdaptiveAvgPool2d((1, None)) |
| mip = max(8, inp // reduction) |
| self.conv1 = nn.Conv2d(inp, mip, kernel_size=1, stride=1, padding=0) |
| self.bn1 = nn.BatchNorm2d(mip) |
| self.act = h_swish() |
| self.conv_h = nn.Conv2d(mip, oup, kernel_size=1, stride=1, padding=0) |
| self.conv_w = nn.Conv2d(mip, oup, kernel_size=1, stride=1, padding=0) |
| def forward(self, x): |
| identity = x |
| n, c, h, w = x.size() |
| # c*1*W |
| x_h = self.pool_h(x) |
| # c*H*1 |
| # C*1*h |
| x_w = self.pool_w(x).permute(0, 1, 3, 2) |
| y = torch.cat([x_h, x_w], dim=2) |
| # C*1*(h+w) |
| y = self.conv1(y) |
| y = self.bn1(y) |
| y = self.act(y) |
| x_h, x_w = torch.split(y, [h, w], dim=2) |
| x_w = x_w.permute(0, 1, 3, 2) |
| a_h = self.conv_h(x_h).sigmoid() |
| a_w = self.conv_w(x_w).sigmoid() |
| out = identity * a_w * a_h |
| return out |
| class stem(nn.Module): |
| def __init__(self,c1,c2,kernel_size=3,stride=1, groups=1): |
| super().__init__() |
| padding=(kernel_size-1)//2 |
| self.conv = nn.Conv2d(c1, c2, kernel_size, stride, padding=padding, groups=groups, bias=False) |
| self.bn =nn.BatchNorm2d(c2,eps=1e-3,momentum=0.1) |
| self.act = nn.SiLU(inplace=True) |
| def forward(self, x): |
| print(x.shape) |
| x= self.conv(x) |
| x= self.bn(x) |
| x= self.act(x) |
| return x |
| def drop_path(x,drop_prob: float = 0.,training: bool =False): |
| if drop_prob ==0. or not training: |
| return x |
| keep_prob = 1-drop_prob |
| shape = (x.shape[0],)+(1,)*(x.ndim - 1) |
| random_tensor = keep_prob + torch.rand(shape, dtype=x.dtype, device=x.device) |
| random_tensor.floor_()# binarize |
| output = x.div(keep_prob) * random_tensor |
| return output |
| class DropPath(nn.Module): |
| def __init__(self, drop_prob=None): |
| super(DropPath,self).__init__() |
| self.drop_prob = drop_prob |
| def forward(self,x): |
| return drop_path(x,self.drop_prob, self.training) |
| class SqueezeExcite_efficientv2(nn.Module): |
| def __init__(self, c1, c2, se_ratio=0.25,act_layer=nn.ReLU): |
| super().__init__() |
| self.gate_fn = nn.Sigmoid() |
| reduced_chs =int(c1 * se_ratio) |
| self.avg_pool = nn.AdaptiveAvgPool2d(1) |
| self.conv_reduce =nn.Conv2d(c1, reduced_chs, 1, bias=True) |
| self.act1 =act_layer(inplace=True) |
| self.conv_expand =nn.Conv2d(reduced_chs, c2, 1, bias=True) |
| def forward(self,x): |
| x_se = self.avg_pool(x) |
| x_se = self.conv_reduce(x_se) |
| x_se = self.act1(x_se) |
| x_se = self.conv_expand(x_se) |
| x_se = self.gate_fn(x_se) |
| x = x * (x_se.expand_as(x)) |
| return x |
| class FusedMBConv(nn.Module): |
| def __init__(self, c1, c2, k=3, s=1, expansion=1, se_ration=0, dropout_rate=0.2, drop_connect_rate=0.2): |
| super().__init__() |
| self.has_shortcut = (s == 1 and c1 == c2) |
| self.has_expansion = expansion !=1 |
| # expansion==1 |
| expanded_c = c1 * expansion |
| if self.has_expansion: |
| self.expansion_conv = stem(c1, expanded_c, kernel_size=k, stride=s) |
| self.project_conv = stem(expanded_c, c2, kernel_size=1, stride=1) |
| else: |
| self.project_conv = stem(c1, c2, kernel_size=k, stride=s) |
| self.drop_connect_rate = drop_connect_rate |
| if self.has_shortcut and drop_connect_rate > 0: |
| self.dropout = DropPath(drop_connect_rate) |
| def forward(self, x): |
| if self.has_expansion: |
| result = self.expansion_conv(x) |
| result = self.project_conv(result) |
| else: |
| result = self.project_conv(x) |
| if self.has_shortcut: |
| if self.drop_connect_rate >0: |
| result = self.dropout(result) |
| result += x |
| return result |
| class MBConv(nn.Module): |
| def __init__(self, c1, c2, k=3, s=1, expansion=1, se_ration=0, dropout_rate=0.2, drop_connect_rate=0.2): |
| super().__init__() |
| self.has_shortcut = (s == 1 and c1 == c2) |
| expanded_c = c1 * expansion |
| self.expansion_conv = stem(c1, expanded_c, kernel_size=1, stride=1) |
| self.dw_conv = stem(expanded_c, expanded_c, kernel_size=k, stride=s, groups=expanded_c) |
| self.se = SqueezeExcite_efficientv2(expanded_c, expanded_c, se_ration) if se_ration > 0 else nn.Identity() |
| self.project_conv = stem(expanded_c, c2, kernel_size=1, stride=1) |
| self.drop_connect_rate = drop_connect_rate |
| if self.has_shortcut and drop_connect_rate > 0: |
| self.dropout = DropPath(drop_connect_rate) |
| def forward(self, x): |
| result =self.expansion_conv(x) |
| result=self.dw_conv(result) |
| result = self.se(result) |
| result = self.project_conv(result) |
| if self.has_shortcut: |
| if self.drop_connect_rate >0: |
| result = self.dropout(result) |
| result += x |
| return result |
| class BiFPN_Add2(nn.Module): |
| def __init__(self, c1, c2): |
| super(BiFPN_Add2, self) .__init__() |
| self.w = nn.Parameter(torch.ones(2, dtype=torch.float32), requires_grad=True) |
| self.epsilon = 0.0001 |
| self.conv = nn.Conv2d(c1, c2, kernel_size=1, stride=1, padding=0) |
| self.silu = nn.SiLU() |
| def forward(self, x): |
| w = self.w |
| weight = w / (torch.sum(w, dim=0) + self.epsilon) |
| return self.conv(self.silu(weight[0] * x[0] + weight[1] * x[1])) |
| class BiFPN_Add3(nn.Module): |
| def __init__(self, c1, c2): |
| super(BiFPN_Add3, self) .__init__() |
| self.w = nn.Parameter(torch.ones(3, dtype=torch.float32), requires_grad=True) |
| self.epsilon = 0.0001 |
| self.conv = nn.Conv2d(c1, c2, kernel_size=1, stride=1, padding=0) |
| self.silu = nn.SiLU() |
| def forward(self, x): |
| w = self.w |
| weight = w / (torch.sum(w, dim=0) + self.epsilon) |
| # Fast normalized fusion |
| return self.conv(self.silu(weight[0]*x[0] + weight[1] * x[1] + weight[2] * x[2]) ) |

**Table S8. yolo.py code for adding network structure by PyCharm2021.3.1**

| import argparse |
| --- |
| import contextlib |
| import math |
| import os |
| import platform |
| import sys |
| from copy import deepcopy |
| from pathlib import Path |
| import torch |
| import torch.nn as nn |
| FILE = Path(__file__).resolve() |
| ROOT = FILE.parents[1] # YOLOv5 root directory |
| if str(ROOT) not in sys.path: |
| sys.path.append(str(ROOT)) # add ROOT to PATH |
| if platform.system() != "Windows": |
| ROOT = Path(os.path.relpath(ROOT, Path.cwd())) # relative |
| from models.common import ( |
| C3, |
| C3SPP, |
| C3TR, |
| SPP, |
| SPPF, |
| Bottleneck, |
| BottleneckCSP, |
| C3Ghost, |
| C3x, |
| Classify, |
| Concat, |
| Contract, |
| Conv, |
| CrossConv, |
| DetectMultiBackend, |
| DWConv, |
| DWConvTranspose2d, |
| Expand, |
| Focus, |
| GhostBottleneck, |
| GhostConv, |
| Proto, stem, Shuffle_Block, SE, CoordAtt, FusedMBConv, MBConv, BiFPN_Add2, BiFPN_Add3, |
| ) |
| from models.experimental import MixConv2d |
| from utils.autoanchor import check_anchor_order |
| from utils.general import LOGGER, check_version, check_yaml, colorstr, make_divisible, print_args |
| from utils.plots import feature_visualization |
| from utils.torch_utils import ( |
| fuse_conv_and_bn, |
| initialize_weights, |
| model_info, |
| profile, |
| scale_img, |
| select_device, |
| time_sync, |
| ) |
| try: |
| import thop # for FLOPs computation |
| except ImportError: |
| thop = None |
| class Detect(nn.Module): |
| """YOLOv5 Detect head for processing input tensors and generating detection outputs in object detection models.""" |
| stride = None # strides computed during build |
| dynamic = False # force grid reconstruction |
| export = False # export mode |
| def __init__(self, nc=80, anchors=(), ch=(), inplace=True): |
| """Initializes YOLOv5 detection layer with specified classes, anchors, channels, and inplace operations.""" |
| super().__init__() |
| self.nc = nc # number of classes |
| self.no = nc + 5 # number of outputs per anchor |
| self.nl = len(anchors) # number of detection layers |
| self.na = len(anchors[0]) // 2 # number of anchors |
| self.grid = [torch.empty(0) for _ in range(self.nl)] # init grid |
| self.anchor_grid = [torch.empty(0) for _ in range(self.nl)] # init anchor grid |
| self.register_buffer("anchors", torch.tensor(anchors).float().view(self.nl, -1, 2)) # shape(nl,na,2) |
| self.m = nn.ModuleList(nn.Conv2d(x, self.no * self.na, 1) for x in ch) # output conv |
| self.inplace = inplace # use inplace ops (e.g. slice assignment) |
| def forward(self, x): |
| """Processes input through YOLOv5 layers, altering shape for detection: `x(bs, 3, ny, nx, 85)`.""" |
| z = [] # inference output |
| for i in range(self.nl): |
| x[i] = self.m[i](x[i]) # conv |
| bs, _, ny, nx = x[i].shape # x(bs,255,20,20) to x(bs,3,20,20,85) |
| x[i] = x[i].view(bs, self.na, self.no, ny, nx).permute(0, 1, 3, 4, 2).contiguous() |
| if not self.training: # inference |
| if self.dynamic or self.grid[i].shape[2:4] != x[i].shape[2:4]: |
| self.grid[i], self.anchor_grid[i] = self._make_grid(nx, ny, i) |
| if isinstance(self, Segment): # (boxes + masks) |
| xy, wh, conf, mask = x[i].split((2, 2, self.nc + 1, self.no - self.nc - 5), 4) |
| xy = (xy.sigmoid() * 2 + self.grid[i]) * self.stride[i] # xy |
| wh = (wh.sigmoid() * 2) ** 2 * self.anchor_grid[i] # wh |
| y = torch.cat((xy, wh, conf.sigmoid(), mask), 4) |
| else: # Detect (boxes only) |
| xy, wh, conf = x[i].sigmoid().split((2, 2, self.nc + 1), 4) |
| xy = (xy * 2 + self.grid[i]) * self.stride[i] # xy |
| wh = (wh * 2) ** 2 * self.anchor_grid[i] # wh |
| y = torch.cat((xy, wh, conf), 4) |
| z.append(y.view(bs, self.na * nx * ny, self.no)) |
| return x if self.training else (torch.cat(z, 1),) if self.export else (torch.cat(z, 1), x) |
| def _make_grid(self, nx=20, ny=20, i=0, torch_1_10=check_version(torch.__version__, "1.10.0")): |
| """Generates a mesh grid for anchor boxes with optional compatibility for torch versions < 1.10.""" |
| d = self.anchors[i].device |
| t = self.anchors[i].dtype |
| shape = 1, self.na, ny, nx, 2 # grid shape |
| y, x = torch.arange(ny, device=d, dtype=t), torch.arange(nx, device=d, dtype=t) |
| yv, xv = torch.meshgrid(y, x, indexing="ij") if torch_1_10 else torch.meshgrid(y, x) # torch>=0.7 compatibility |
| grid = torch.stack((xv, yv), 2).expand(shape) - 0.5 # add grid offset, i.e. y = 2.0 * x - 0.5 |
| anchor_grid = (self.anchors[i] * self.stride[i]).view((1, self.na, 1, 1, 2)).expand(shape) |
| return grid, anchor_grid |
| class Segment(Detect): |
| """YOLOv5 Segment head for segmentation models, extending Detect with mask and prototype layers.""" |
| def __init__(self, nc=80, anchors=(), nm=32, npr=256, ch=(), inplace=True): |
| """Initializes YOLOv5 Segment head with options for mask count, protos, and channel adjustments.""" |
| super().__init__(nc, anchors, ch, inplace) |
| self.nm = nm # number of masks |
| self.npr = npr # number of protos |
| self.no = 5 + nc + self.nm # number of outputs per anchor |
| self.m = nn.ModuleList(nn.Conv2d(x, self.no * self.na, 1) for x in ch) # output conv |
| self.proto = Proto(ch[0], self.npr, self.nm) # protos |
| self.detect = Detect.forward |
| def forward(self, x): |
| """Processes input through the network, returning detections and prototypes; adjusts output based on |
| training/export mode. |
| """ |
| p = self.proto(x[0]) |
| x = self.detect(self, x) |
| return (x, p) if self.training else (x[0], p) if self.export else (x[0], p, x[1]) |
| class BaseModel(nn.Module): |
| """YOLOv5 base model.""" |
| def forward(self, x, profile=False, visualize=False): |
| """Executes a single-scale inference or training pass on the YOLOv5 base model, with options for profiling and |
| visualization. |
| """ |
| return self._forward_once(x, profile, visualize) # single-scale inference, train |
| def _forward_once(self, x, profile=False, visualize=False): |
| """Performs a forward pass on the YOLOv5 model, enabling profiling and feature visualization options.""" |
| y, dt = [], [] # outputs |
| for m in self.model: |
| if m.f != -1: # if not from previous layer |
| x = y[m.f] if isinstance(m.f, int) else [x if j == -1 else y[j] for j in m.f] # from earlier layers |
| if profile: |
| self._profile_one_layer(m, x, dt) |
| x = m(x) # run |
| y.append(x if m.i in self.save else None) # save output |
| if visualize: |
| feature_visualization(x, m.type, m.i, save_dir=visualize) |
| return x |
| def _profile_one_layer(self, m, x, dt): |
| """Profiles a single layer's performance by computing GFLOPs, execution time, and parameters.""" |
| c = m == self.model[-1] # is final layer, copy input as inplace fix |
| o = thop.profile(m, inputs=(x.copy() if c else x,), verbose=False)[0] / 1e9 * 2 if thop else 0 # FLOPs |
| t = time_sync() |
| for _ in range(10): |
| m(x.copy() if c else x) |
| dt.append((time_sync() - t) * 100) |
| if m == self.model[0]: |
| LOGGER.info(f"{'time (ms)':>10s} {'GFLOPs':>10s} {'params':>10s} module") |
| LOGGER.info(f"{dt[-1]:10.2f} {o:10.2f} {m.np:10.0f} {m.type}") |
| if c: |
| LOGGER.info(f"{sum(dt):10.2f} {'-':>10s} {'-':>10s} Total") |
| def fuse(self): |
| """Fuses Conv2d() and BatchNorm2d() layers in the model to improve inference speed.""" |
| LOGGER.info("Fusing layers... ") |
| for m in self.model.modules(): |
| if isinstance(m, (Conv, DWConv)) and hasattr(m, "bn"): |
| m.conv = fuse_conv_and_bn(m.conv, m.bn) # update conv |
| delattr(m, "bn") # remove batchnorm |
| m.forward = m.forward_fuse # update forward |
| self.info() |
| return self |
| def info(self, verbose=False, img_size=640): |
| """Prints model information given verbosity and image size, e.g., `info(verbose=True, img_size=640)`.""" |
| model_info(self, verbose, img_size) |
| def _apply(self, fn): |
| """Applies transformations like to(), cpu(), cuda(), half() to model tensors excluding parameters or registered |
| buffers. |
| """ |
| self = super()._apply(fn) |
| m = self.model[-1] # Detect() |
| if isinstance(m, (Detect, Segment)): |
| m.stride = fn(m.stride) |
| m.grid = list(map(fn, m.grid)) |
| if isinstance(m.anchor_grid, list): |
| m.anchor_grid = list(map(fn, m.anchor_grid)) |
| return self |
| class DetectionModel(BaseModel): |
| """YOLOv5 detection model class for object detection tasks, supporting custom configurations and anchors.""" |
| def __init__(self, cfg="yolov5s_BiFPN.yaml", ch=3, nc=None, anchors=None): |
| """Initializes YOLOv5 model with configuration file, input channels, number of classes, and custom anchors.""" |
| super().__init__() |
| if isinstance(cfg, dict): |
| self.yaml = cfg # model dict |
| else: # is *.yaml |
| import yaml # for torch hub |
| self.yaml_file = Path(cfg).name |
| with open(cfg, encoding="ascii", errors="ignore") as f: |
| self.yaml = yaml.safe_load(f) # model dict |
| # Define model |
| ch = self.yaml["ch"] = self.yaml.get("ch", ch) # input channels |
| if nc and nc != self.yaml['nc']: |
| LOGGER.info(f"Overriding model.yaml nc={self.yaml['nc']} with nc={nc}") |
| self.yaml["nc"] = nc # override yaml value |
| if anchors: |
| LOGGER.info(f"Overriding model.yaml anchors with anchors={anchors}") |
| self.yaml["anchors"] = round(anchors) # override yaml value |
| self.model, self.save = parse_model(deepcopy(self.yaml), ch=[ch]) # model, savelist |
| self.names = [str(i) for i in range(self.yaml["nc"])] # default names |
| self.inplace = self.yaml.get("inplace", True) |
| # Build strides, anchors |
| m = self.model[-1] # Detect() |
| if isinstance(m, (Detect, Segment)): |
| def _forward(x): |
| """Passes the input 'x' through the model and returns the processed output.""" |
| return self.forward(x)[0] if isinstance(m, Segment) else self.forward(x) |
| s = 256 # 2x min stride |
| m.inplace = self.inplace |
| m.stride = torch.tensor([s / x.shape[-2] for x in _forward(torch.zeros(1, ch, s, s))]) # forward |
| check_anchor_order(m) |
| m.anchors /= m.stride.view(-1, 1, 1) |
| self.stride = m.stride |
| self._initialize_biases() # only run once |
| # Init weights, biases |
| initialize_weights(self) |
| self.info() |
| LOGGER.info("") |
| def forward(self, x, augment=False, profile=False, visualize=False): |
| """Performs single-scale or augmented inference and may include profiling or visualization.""" |
| if augment: |
| return self._forward_augment(x) # augmented inference, None |
| return self._forward_once(x, profile, visualize) # single-scale inference, train |
| def _forward_augment(self, x): |
| """Performs augmented inference across different scales and flips, returning combined detections.""" |
| img_size = x.shape[-2:] # height, width |
| s = [1, 0.83, 0.67] # scales |
| f = [None, 3, None] # flips (2-ud, 3-lr) |
| y = [] # outputs |
| for si, fi in zip(s, f): |
| xi = scale_img(x.flip(fi) if fi else x, si, gs=int(self.stride.max())) |
| yi = self._forward_once(xi)[0] # forward |
| # cv2.imwrite(f'img_{si}.jpg', 255 * xi[0].cpu().numpy().transpose((1, 2, 0))[:, :, ::-1]) # save |
| yi = self._descale_pred(yi, fi, si, img_size) |
| y.append(yi) |
| y = self._clip_augmented(y) # clip augmented tails |
| return torch.cat(y, 1), None # augmented inference, train |
| def _descale_pred(self, p, flips, scale, img_size): |
| """De-scales predictions from augmented inference, adjusting for flips and image size.""" |
| if self.inplace: |
| p[..., :4] /= scale # de-scale |
| if flips == 2: |
| p[..., 1] = img_size[0] - p[..., 1] # de-flip ud |
| elif flips == 3: |
| p[..., 0] = img_size[1] - p[..., 0] # de-flip lr |
| else: |
| x, y, wh = p[..., 0:1] / scale, p[..., 1:2] / scale, p[..., 2:4] / scale # de-scale |
| if flips == 2: |
| y = img_size[0] - y # de-flip ud |
| elif flips == 3: |
| x = img_size[1] - x # de-flip lr |
| p = torch.cat((x, y, wh, p[..., 4:]), -1) |
| return p |
| def _clip_augmented(self, y): |
| """Clips augmented inference tails for YOLOv5 models, affecting first and last tensors based on grid points and |
| layer counts. |
| """ |
| nl = self.model[-1].nl # number of detection layers (P3-P5) |
| g = sum(4**x for x in range(nl)) # grid points |
| e = 1 # exclude layer count |
| i = (y[0].shape[1] // g) * sum(4**x for x in range(e)) # indices |
| y[0] = y[0][:, :-i] # large |
| i = (y[-1].shape[1] // g) * sum(4 ** (nl - 1 - x) for x in range(e)) # indices |
| y[-1] = y[-1][:, i:] # small |
| return y |
| def _initialize_biases(self, cf=None): |
| """ |
| Initializes biases for YOLOv5's Detect() module, optionally using class frequencies (cf). |
| For details see https://arxiv.org/abs/1708.02002 section 3.3. |
| """ |
| # cf = torch.bincount(torch.tensor(np.concatenate(dataset.labels, 0)[:, 0]).long(), minlength=nc) + 1. |
| m = self.model[-1] # Detect() module |
| for mi, s in zip(m.m, m.stride): # from |
| b = mi.bias.view(m.na, -1) # conv.bias(255) to (3,85) |
| b.data[:, 4] += math.log(8 / (640 / s) ** 2) # obj (8 objects per 640 image) |
| b.data[:, 5 : 5 + m.nc] += ( |
| math.log(0.6 / (m.nc - 0.99999)) if cf is None else torch.log(cf / cf.sum()) |
| ) # cls |
| mi.bias = torch.nn.Parameter(b.view(-1), requires_grad=True) |
| Model = DetectionModel # retain YOLOv5 'Model' class for backwards compatibility |
| class SegmentationModel(DetectionModel): |
| """YOLOv5 segmentation model for object detection and segmentation tasks with configurable parameters.""" |
| def __init__(self, cfg="yolov5s-seg.yaml", ch=3, nc=None, anchors=None): |
| """Initializes a YOLOv5 segmentation model with configurable params: cfg (str) for configuration, ch (int) for channels, nc (int) for num classes, anchors (list).""" |
| super().__init__(cfg, ch, nc, anchors) |
| class ClassificationModel(BaseModel): |
| """YOLOv5 classification model for image classification tasks, initialized with a config file or detection model.""" |
| def __init__(self, cfg=None, model=None, nc=1000, cutoff=10): |
| """Initializes YOLOv5 model with config file `cfg`, input channels `ch`, number of classes `nc`, and `cuttoff` |
| index. |
| """ |
| super().__init__() |
| self._from_detection_model(model, nc, cutoff) if model is not None else self._from_yaml(cfg) |
| def _from_detection_model(self, model, nc=1000, cutoff=10): |
| """Creates a classification model from a YOLOv5 detection model, slicing at `cutoff` and adding a classification |
| layer. |
| """ |
| if isinstance(model, DetectMultiBackend): |
| model = model.model # unwrap DetectMultiBackend |
| model.model = model.model[:cutoff] # backbone |
| m = model.model[-1] # last layer |
| ch = m.conv.in_channels if hasattr(m, "conv") else m.cv1.conv.in_channels # ch into module |
| c = Classify(ch, nc) # Classify() |
| c.i, c.f, c.type = m.i, m.f, "models.common.Classify" # index, from, type |
| model.model[-1] = c # replace |
| self.model = model.model |
| self.stride = model.stride |
| self.save = [] |
| self.nc = nc |
| def _from_yaml(self, cfg): |
| """Creates a YOLOv5 classification model from a specified *.yaml configuration file.""" |
| self.model = None |
| def parse_model(d, ch): |
| """Parses a YOLOv5 model from a dict `d`, configuring layers based on input channels `ch` and model architecture.""" |
| LOGGER.info(f"\n{'':>3}{'from':>18}{'n':>3}{'params':>10} {'module':<40}{'arguments':<30}") |
| anchors, nc, gd, gw, act, ch_mul = ( |
| d["anchors"], |
| d["nc"], |
| d["depth_multiple"], |
| d["width_multiple"], |
| d.get("activation"), |
| d.get("channel_multiple"), |
| ) |
| if act: |
| Conv.default_act = eval(act) # redefine default activation, i.e. Conv.default_act = nn.SiLU() |
| LOGGER.info(f"{colorstr('activation:')} {act}") # print |
| if not ch_mul: |
| ch_mul = 8 |
| na = (len(anchors[0]) // 2) if isinstance(anchors, list) else anchors # number of anchors |
| no = na * (nc + 5) # number of outputs = anchors * (classes + 5) |
| layers, save, c2 = [], [], ch[-1] # layers, savelist, ch out |
| for i, (f, n, m, args) in enumerate(d["backbone"] + d["head"]): # from, number, module, args |
| m = eval(m) if isinstance(m, str) else m # eval strings |
| for j, a in enumerate(args): |
| with contextlib.suppress(NameError): |
| args[j] = eval(a) if isinstance(a, str) else a # eval strings |
| n = n_ = max(round(n * gd), 1) if n > 1 else n # depth gain |
| if m in { |
| Conv, |
| GhostConv, |
| Bottleneck, |
| GhostBottleneck, |
| SPP, |
| SPPF, |
| DWConv, |
| MixConv2d, |
| Focus, |
| CrossConv, |
| BottleneckCSP, |
| C3, |
| C3TR, |
| C3SPP, |
| C3Ghost, |
| nn.ConvTranspose2d, |
| DWConvTranspose2d, |
| C3x, |
| stem, |
| Shuffle_Block, |
| GhostBottleneck, |
| GhostConv, |
| SE, |
| CoordAtt, |
| stem, |
| FusedMBConv, |
| MBConv, |
| }: |
| c1, c2 = ch[f], args[0] |
| if c2 != no: # if not output |
| c2 = make_divisible(c2 * gw, ch_mul) |
| args = [c1, c2, *args[1:]] |
| if m in {BottleneckCSP, C3, C3TR, C3Ghost, C3x}: |
| args.insert(2, n) # number of repeats |
| n = 1 |
| elif m is nn.BatchNorm2d: |
| args = [ch[f]] |
| elif m is Concat: |
| c2 = sum(ch[x] for x in f) |
| # TODO: channel, gw, gd |
| elif m in [BiFPN_Add2, BiFPN_Add3]: |
| c2 = max([ch[x] for x in f]) |
| elif m in {Detect, Segment}: |
| args.append([ch[x] for x in f]) |
| if isinstance(args[1], int): # number of anchors |
| args[1] = [list(range(args[1] * 2))] * len(f) |
| if m is Segment: |
| args[3] = make_divisible(args[3] * gw, ch_mul) |
| elif m is Contract: |
| c2 = ch[f] * args[0] ** 2 |
| elif m is Expand: |
| c2 = ch[f] // args[0] ** 2 |
| else: |
| c2 = ch[f] |
| m_ = nn.Sequential(*(m(*args) for _ in range(n))) if n > 1 else m(*args) # module |
| t = str(m)[8:-2].replace("__main__.", "") # module type |
| np = sum(x.numel() for x in m_.parameters()) # number params |
| m_.i, m_.f, m_.type, m_.np = i, f, t, np # attach index, 'from' index, type, number params |
| LOGGER.info(f"{i:>3}{str(f):>18}{n_:>3}{np:10.0f} {t:<40}{str(args):<30}") # print |
| save.extend(x % i for x in ([f] if isinstance(f, int) else f) if x != -1) # append to savelist |
| layers.append(m_) |
| if i == 0: |
| ch = [] |
| ch.append(c2) |
| return nn.Sequential(*layers), sorted(save) |
| if __name__ == "__main__": |
| parser = argparse.ArgumentParser() |
| parser.add_argument("--cfg", type=str, default="yolov5s_BiFPN.yaml", help="model.yaml") |
| parser.add_argument("--batch-size", type=int, default=1, help="total batch size for all GPUs") |
| parser.add_argument("--device", default="", help="cuda device, i.e. 0 or 0,1,2,3 or cpu") |
| parser.add_argument("--profile", action="store_true", help="profile model speed") |
| parser.add_argument("--line-profile", action="store_true", help="profile model speed layer by layer") |
| parser.add_argument("--test", action="store_true", help="test all yolo*.yaml") |
| opt = parser.parse_args() |
| opt.cfg = check_yaml(opt.cfg) # check YAML |
| print_args(vars(opt)) |
| device = select_device(opt.device) |
| # Create model |
| im = torch.rand(opt.batch_size, 3, 640, 640).to(device) |
| model = Model(opt.cfg).to(device) |
| # Options |
| if opt.line_profile: # profile layer by layer |
| model(im, profile=True) |
| elif opt.profile: # profile forward-backward |
| results = profile(input=im, ops=[model], n=3) |
| elif opt.test: # test all models |
| for cfg in Path(ROOT / "models").rglob("yolo*.yaml"): |
| try: |
| _ = Model(cfg) |
| except Exception as e: |
| print(f"Error in {cfg}: {e}") |
| else: # report fused model summary |
| model.fuse() |

**Original pictures of bronze wares**

**1.jpg**
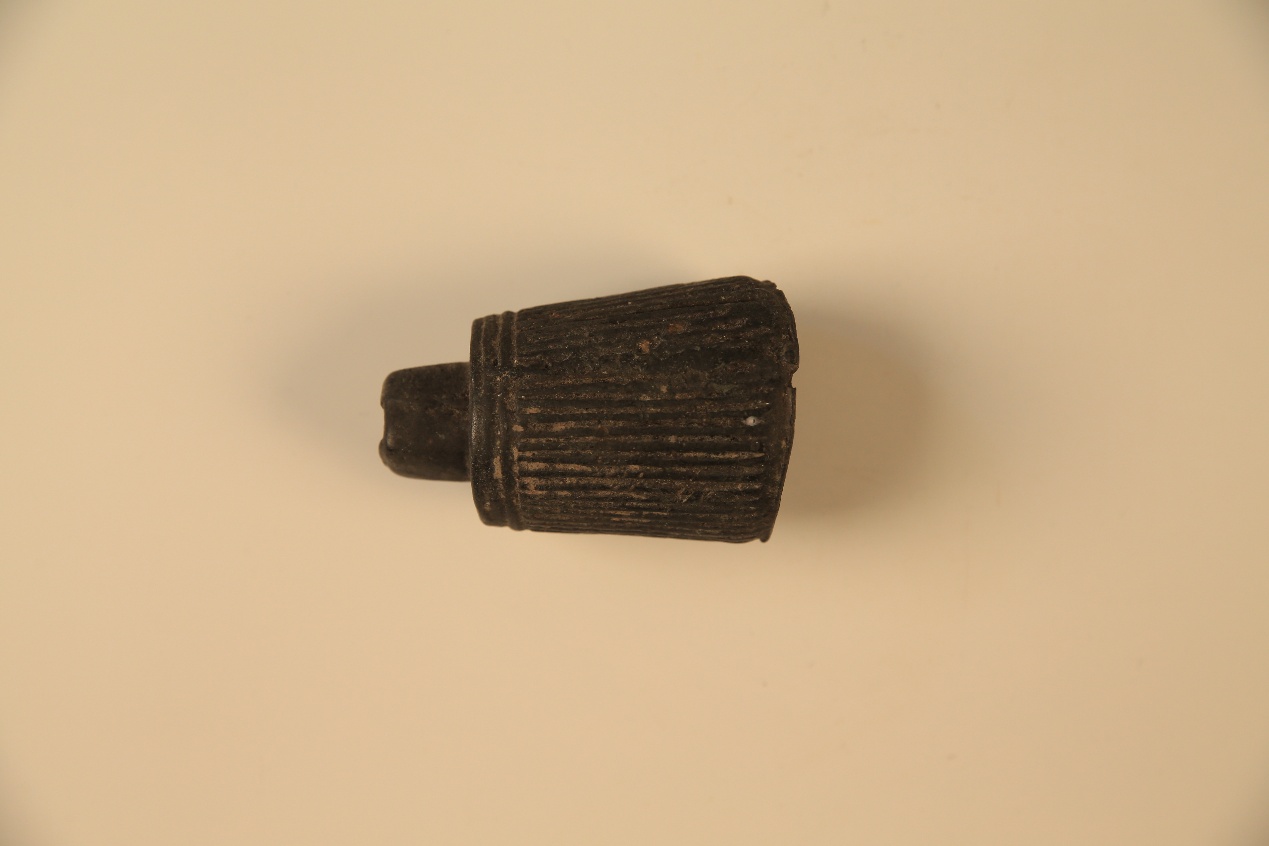


**2.jpg**
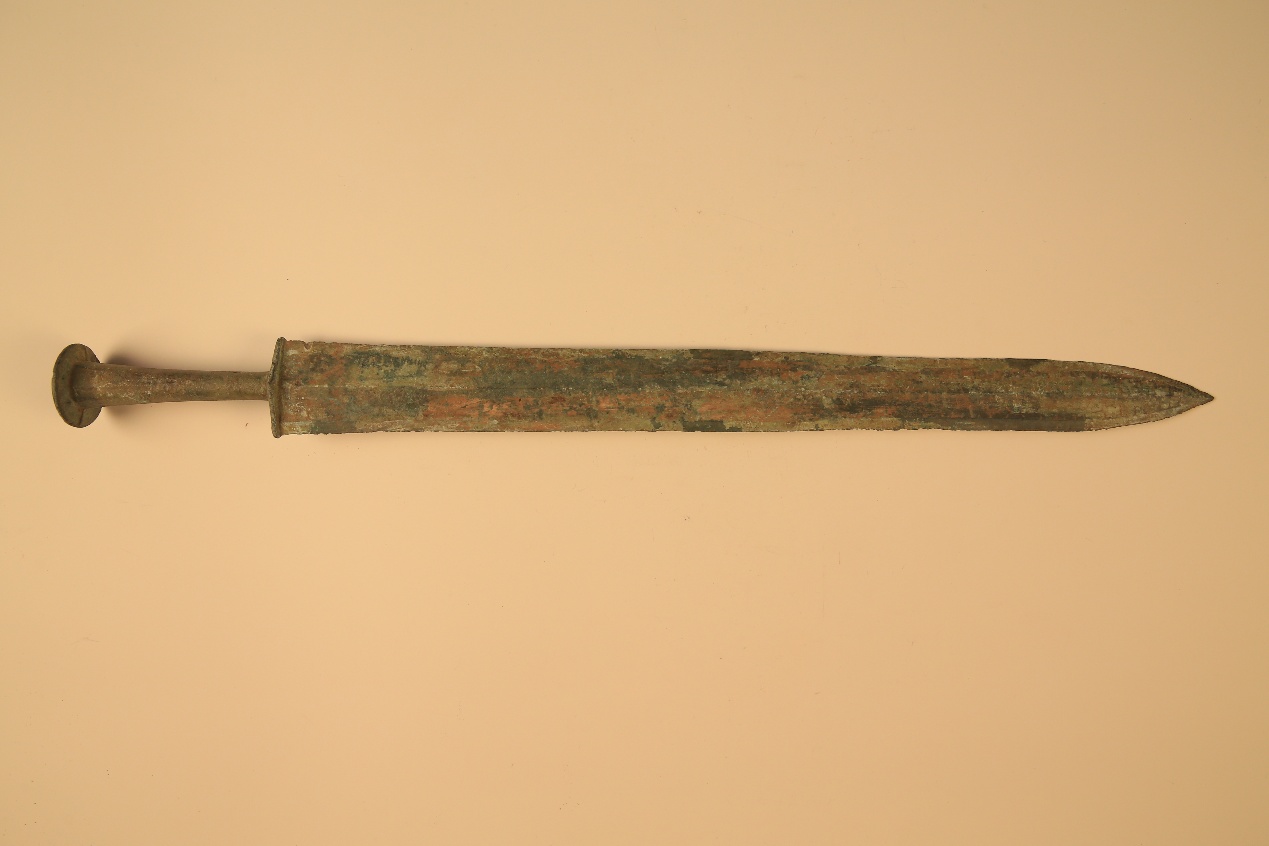


**3.jpg**
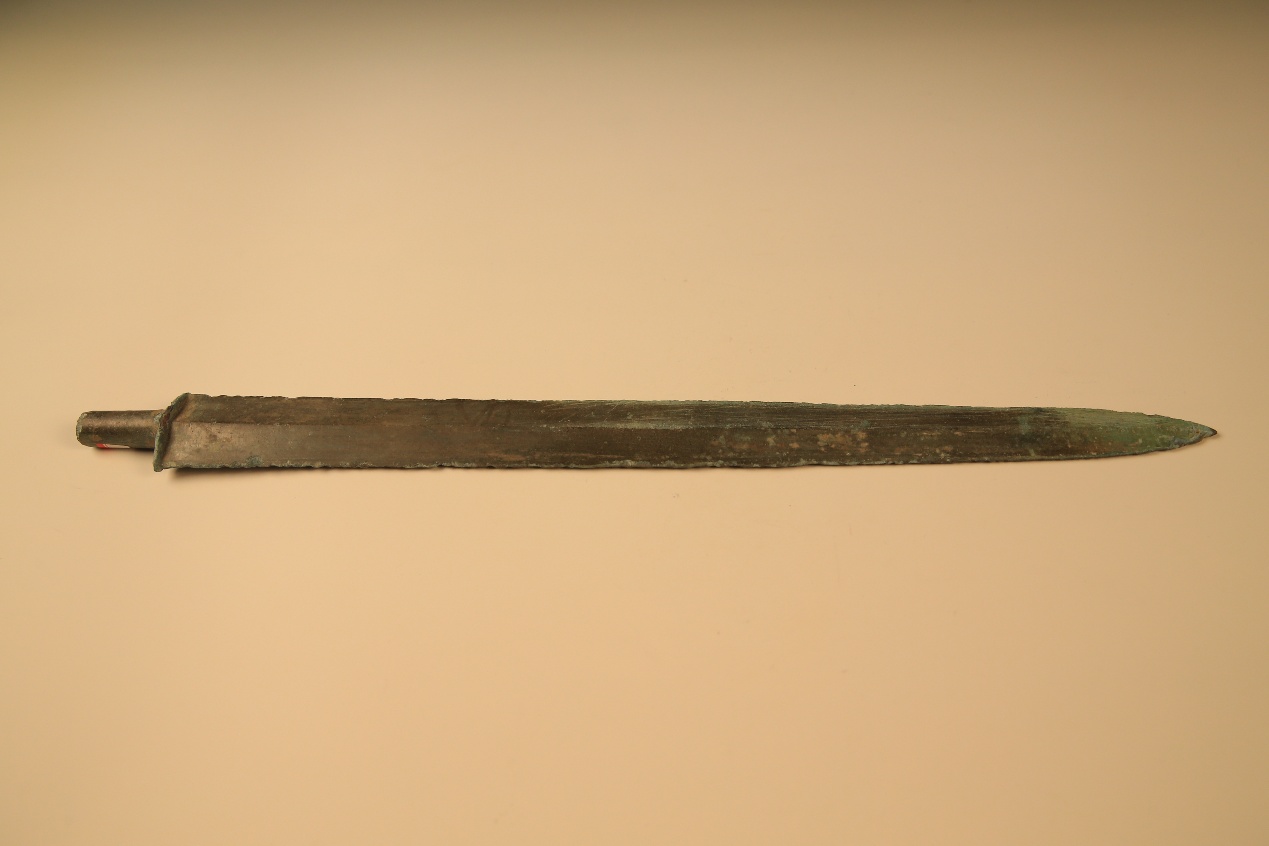


**4.jpg**
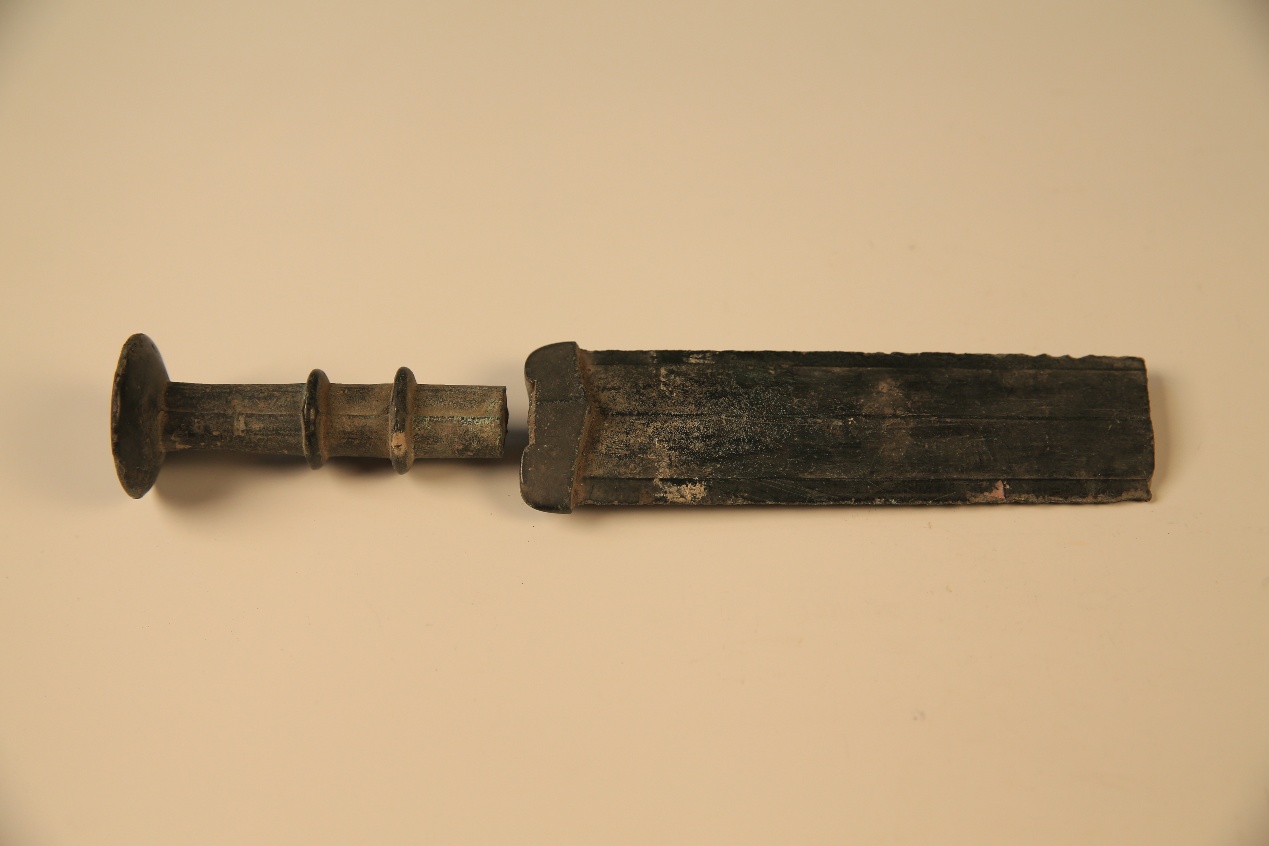


**5.jpg**
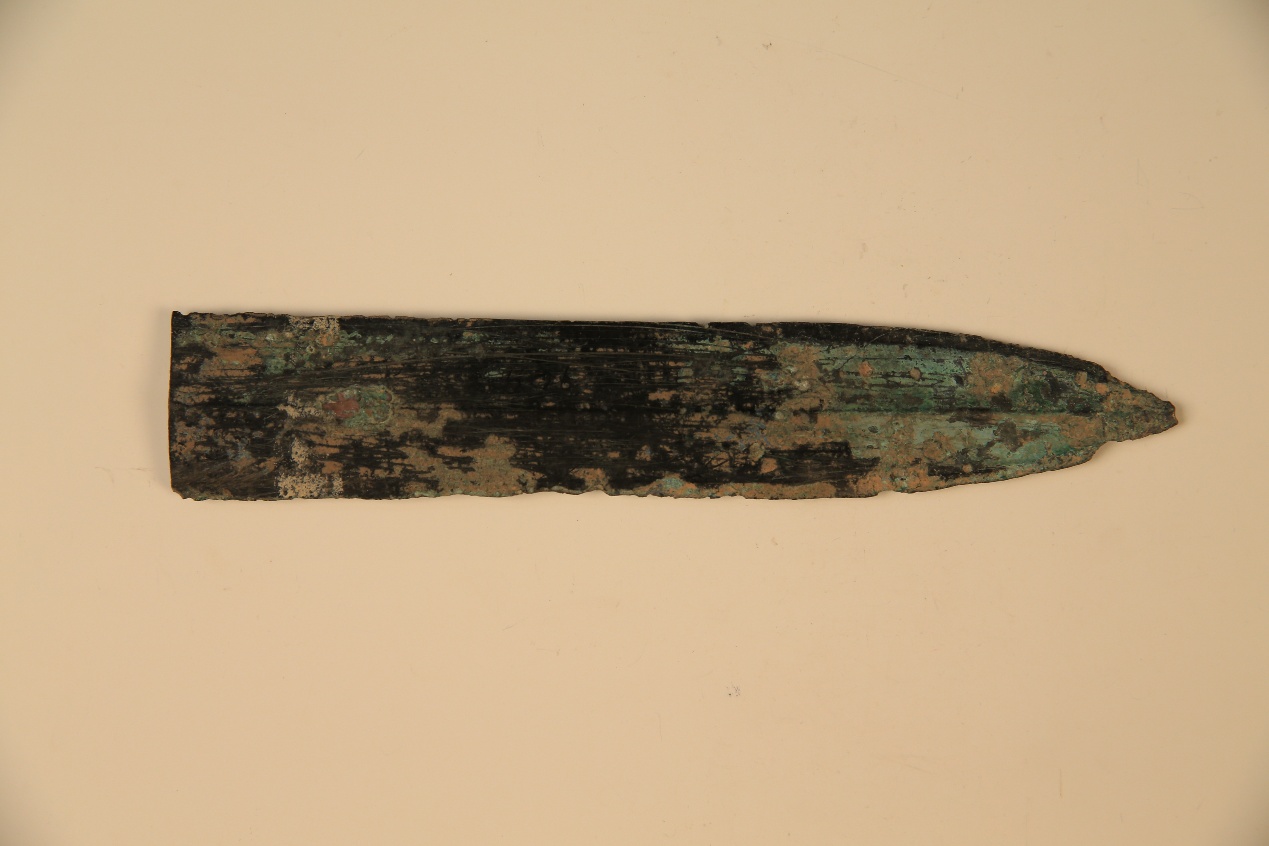


**6.jpg**
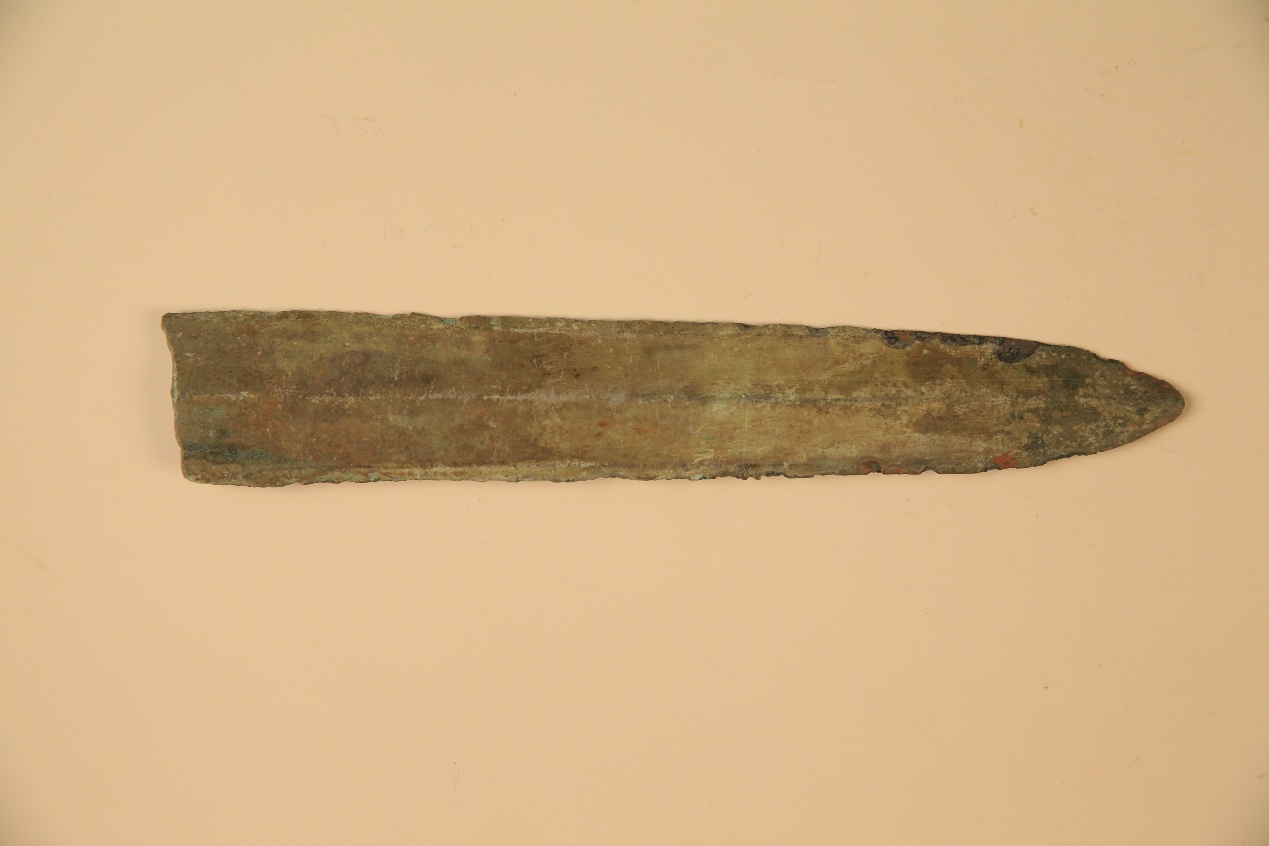


**7.jpg**
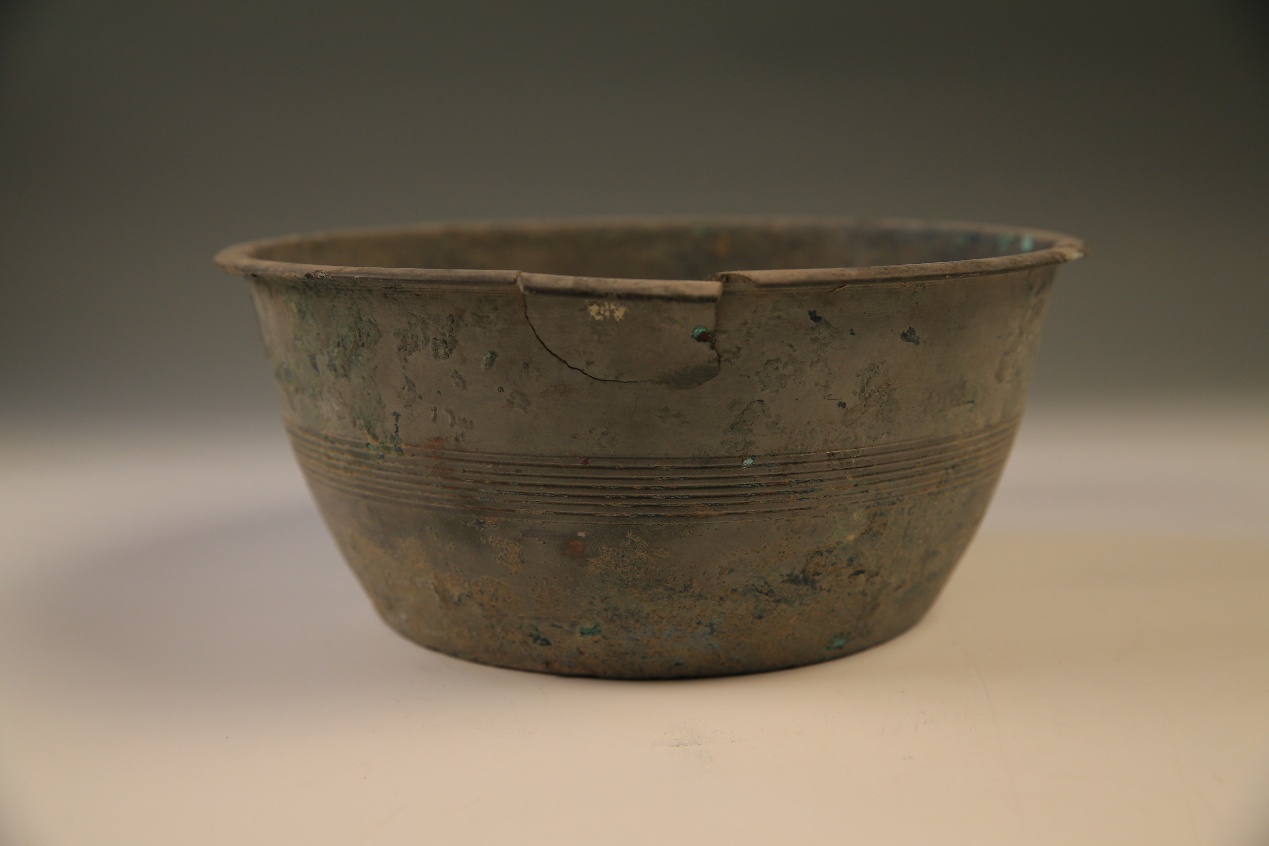


**8.jpg**
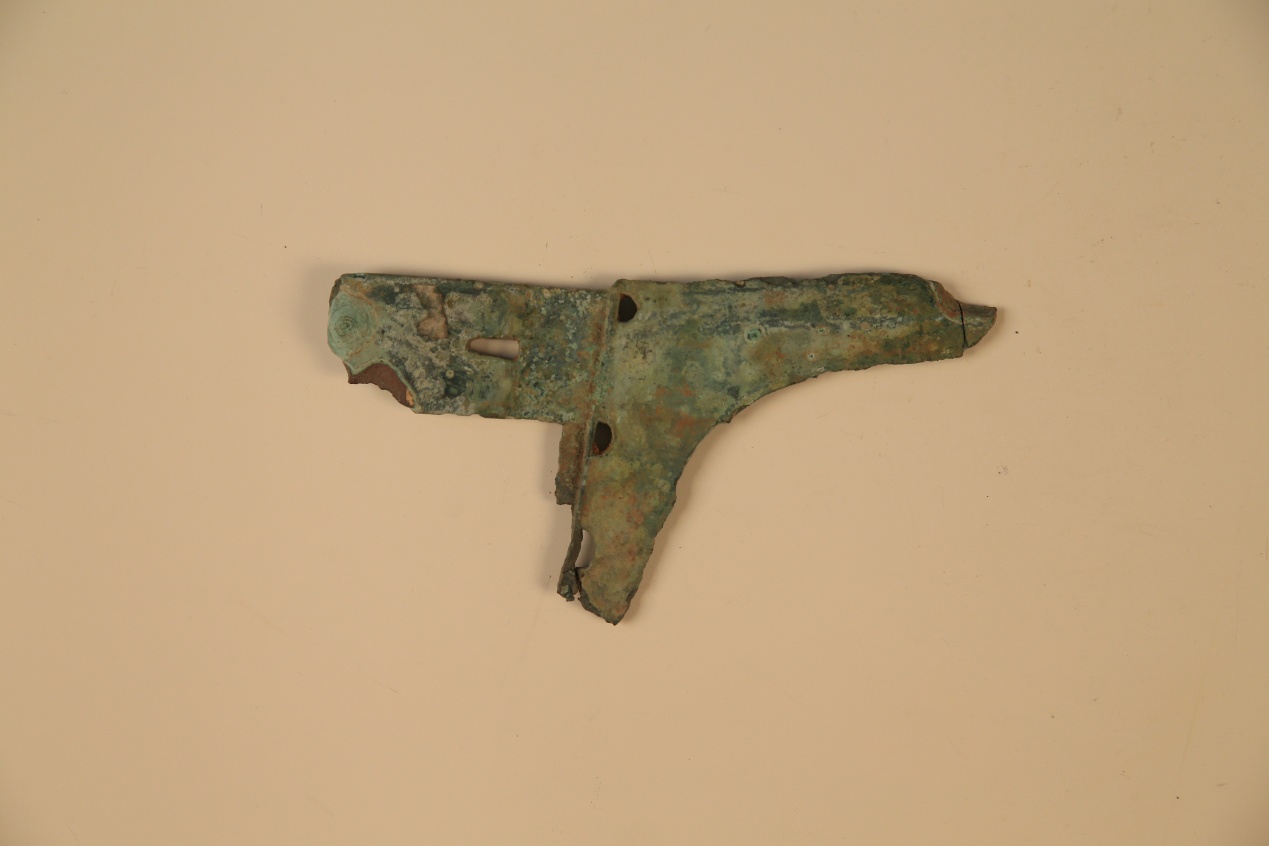


**9.jpg**
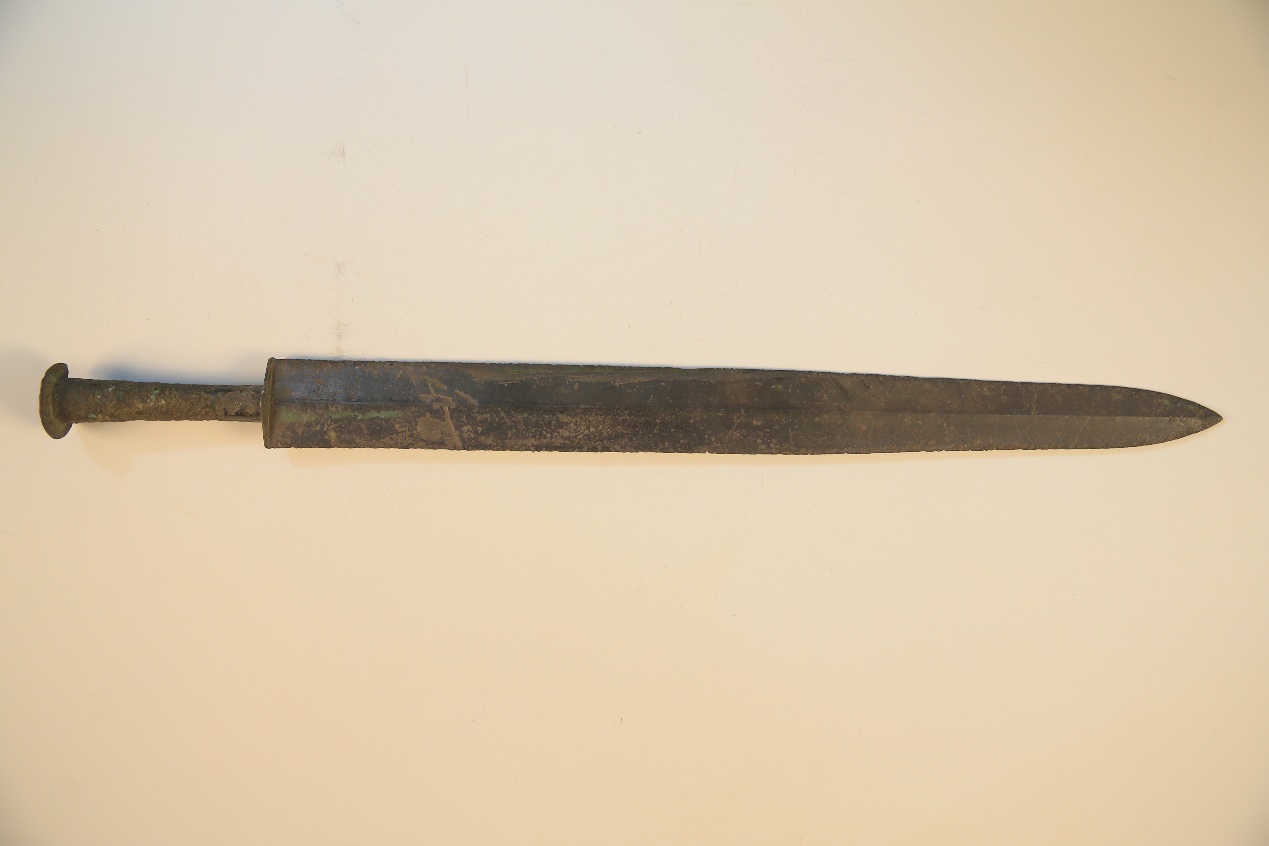


**10.jpg**
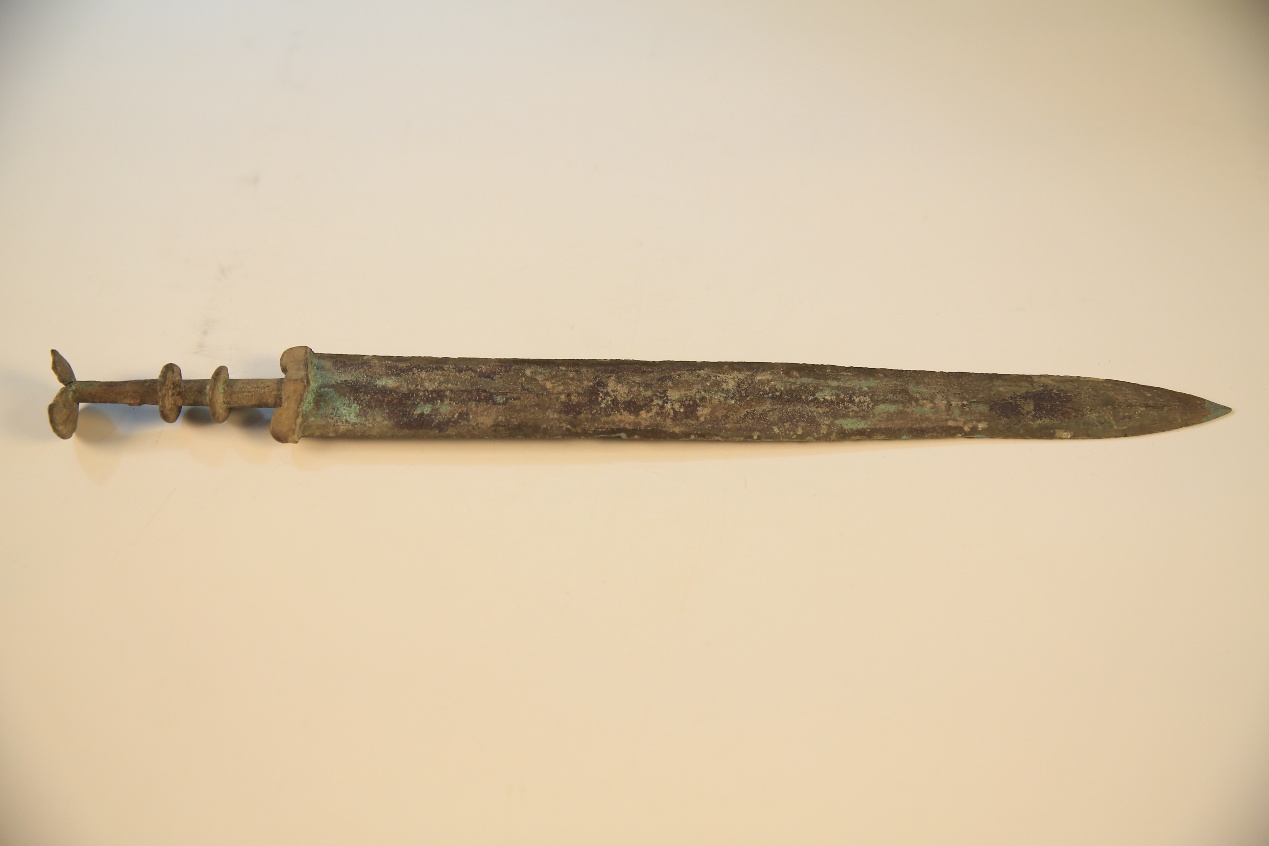


**11.jpg**
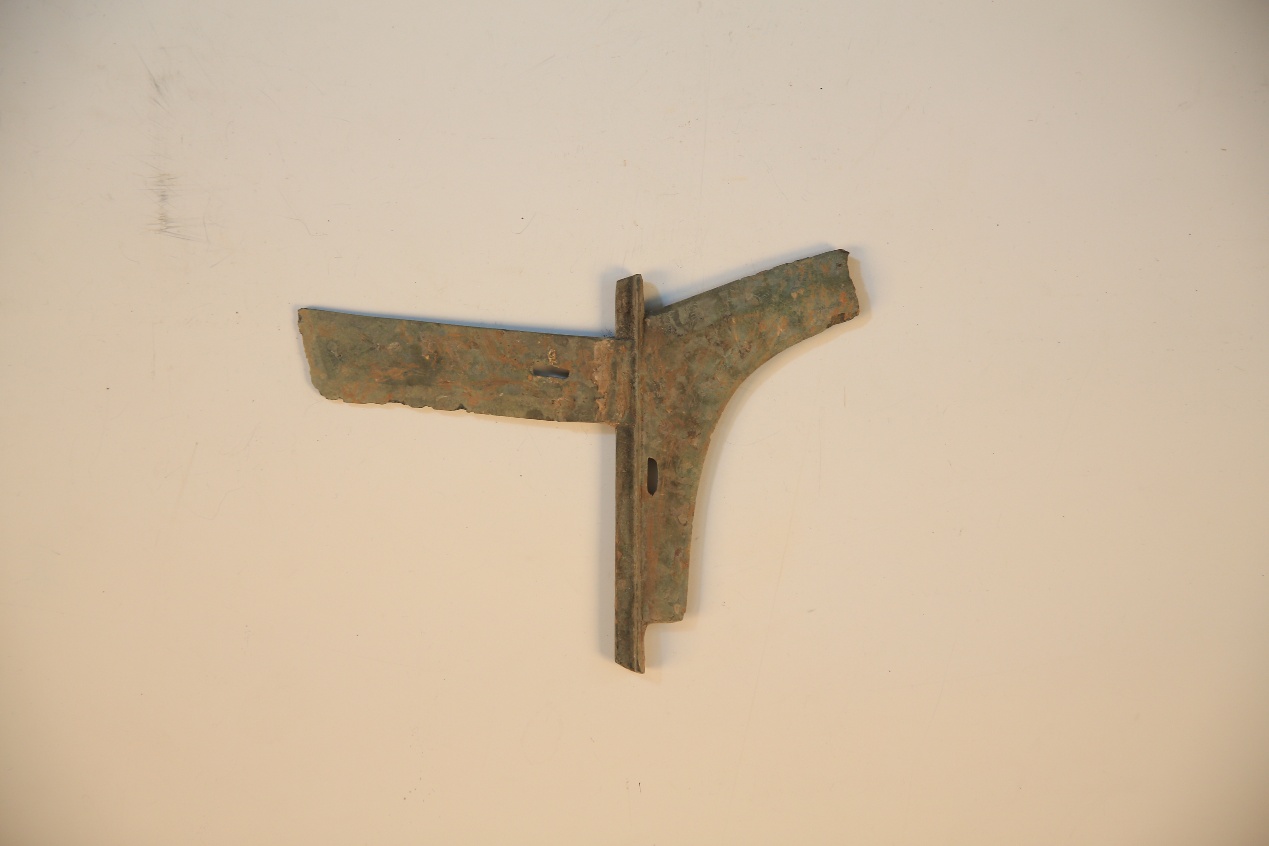


**12.jpg**
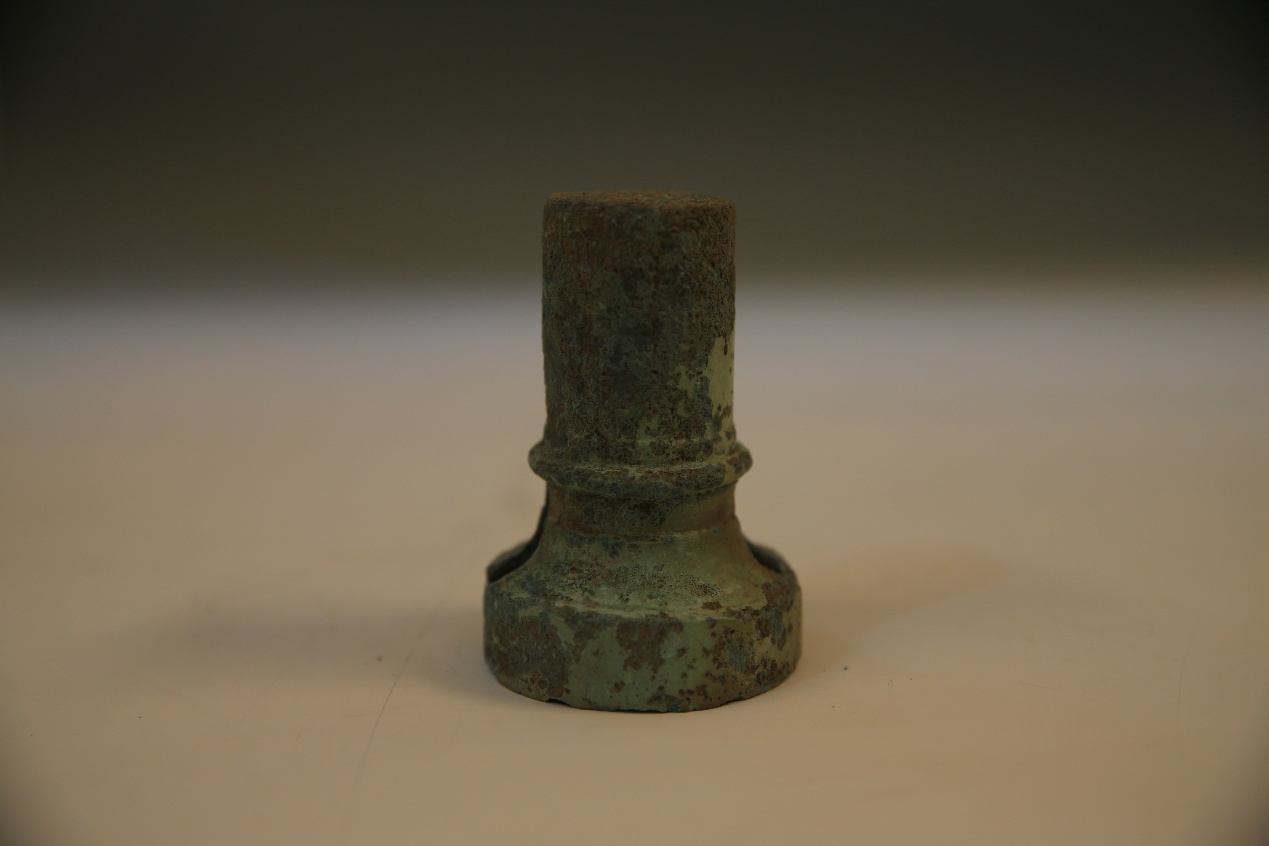


**13.jpg**
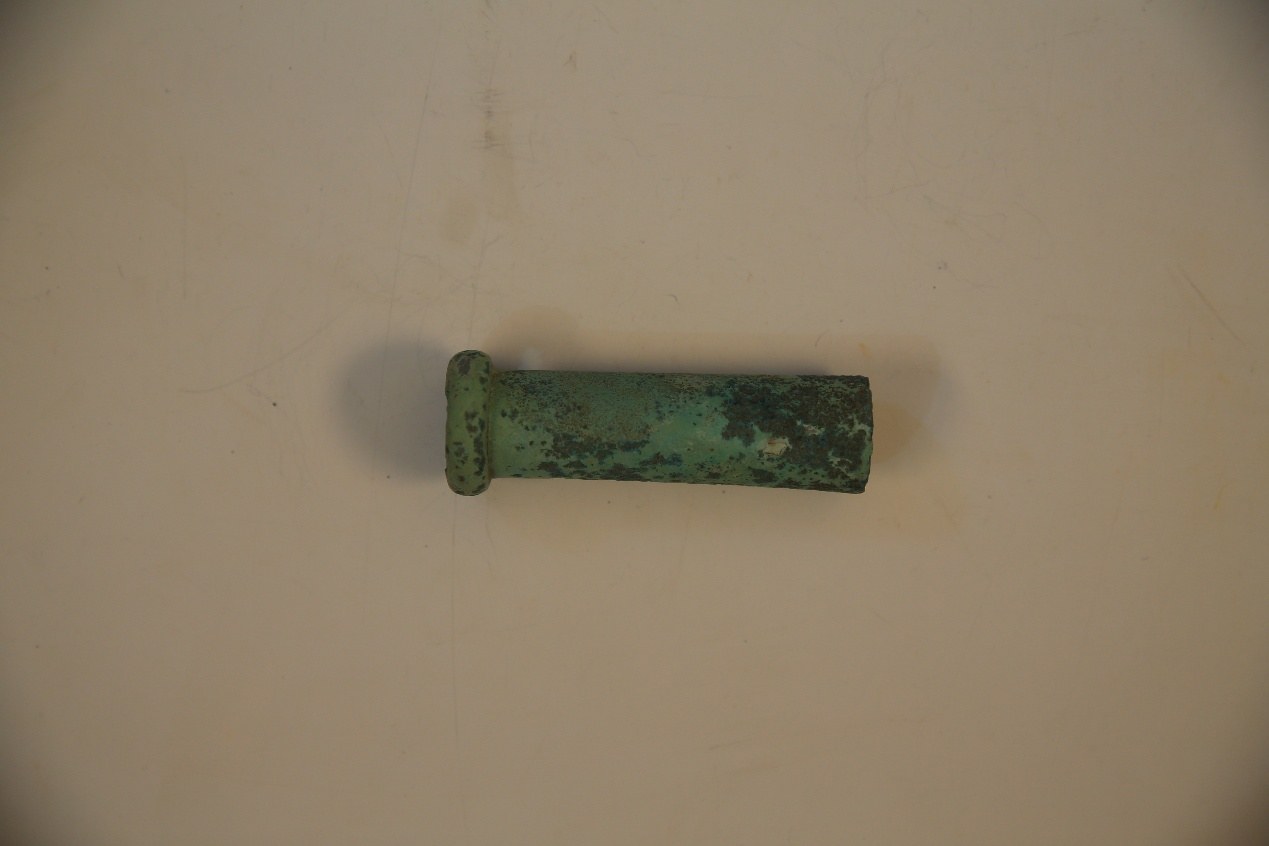


**14.jpg**
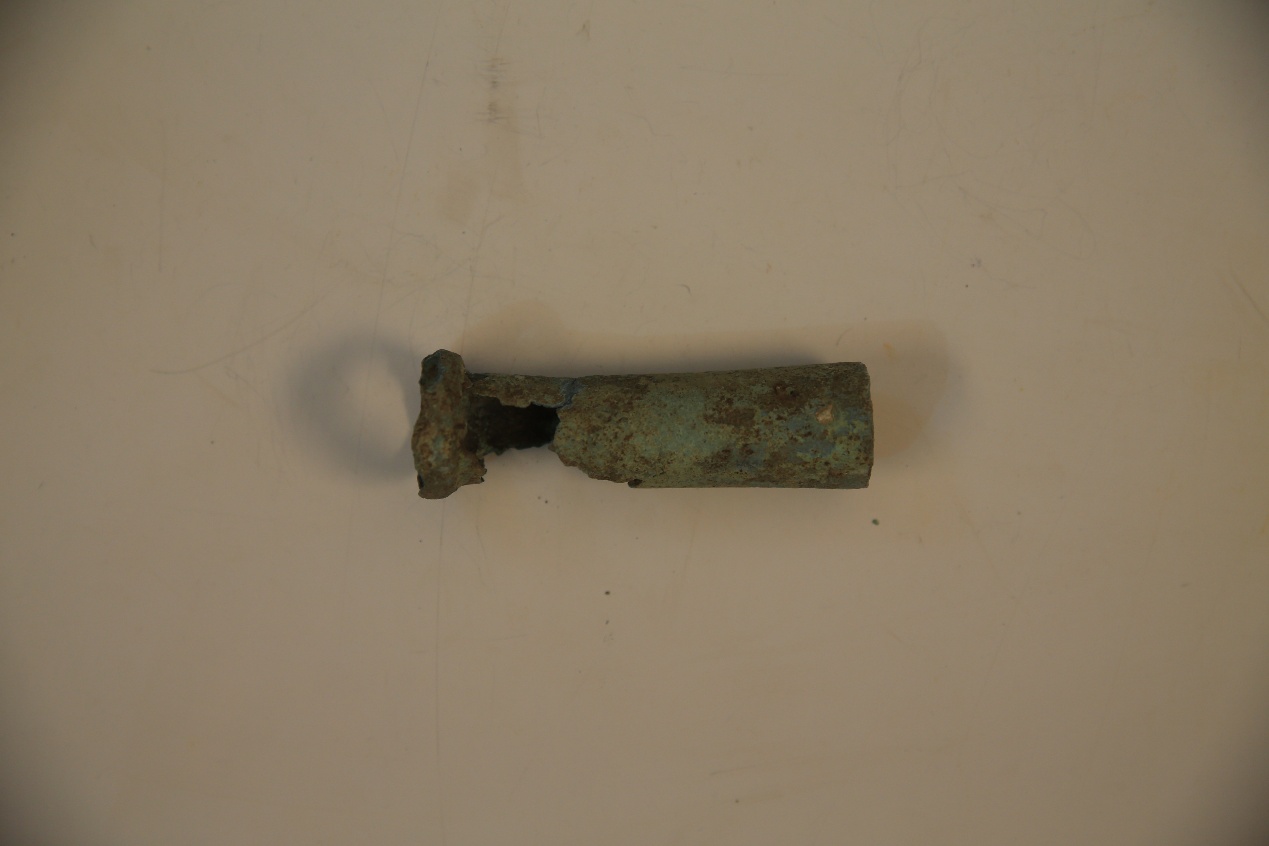


**15.jpg**
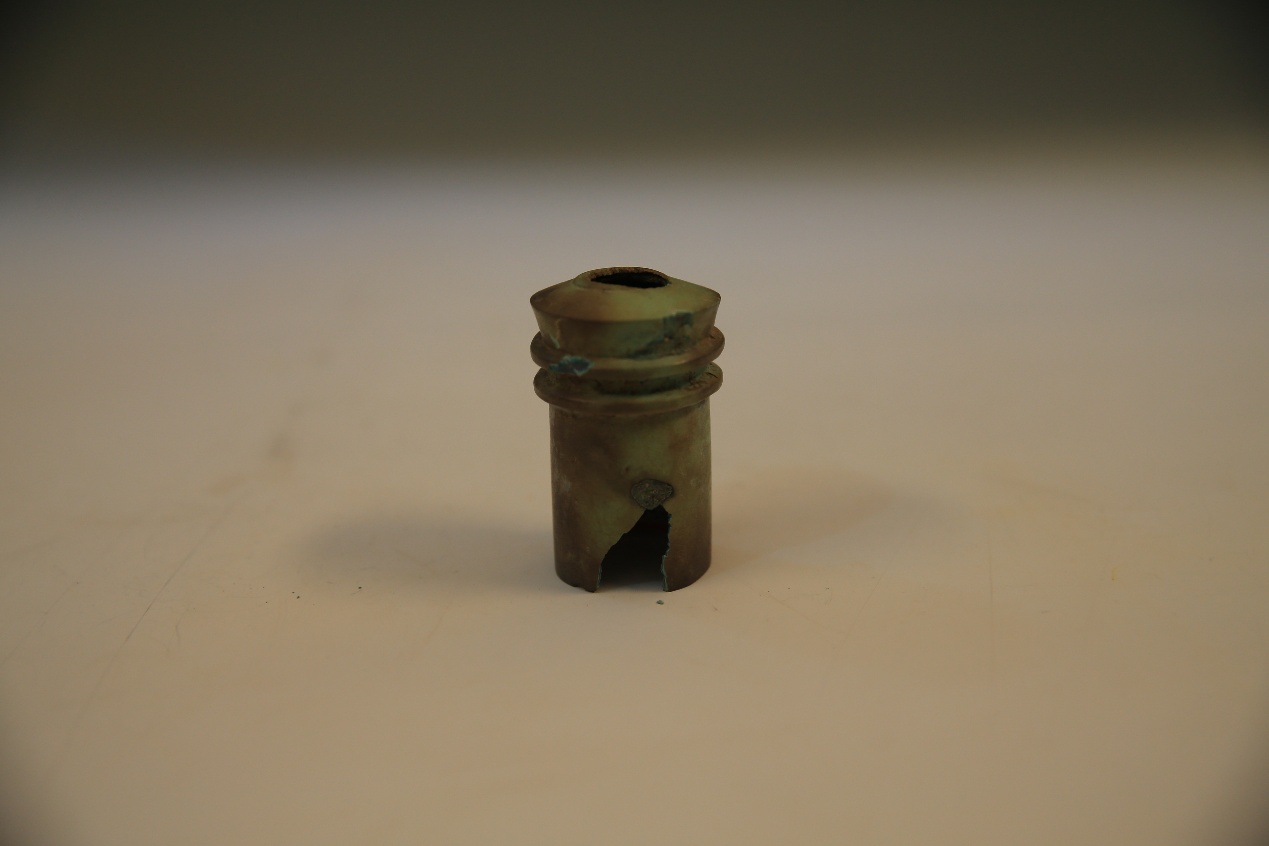


**16.jpg**
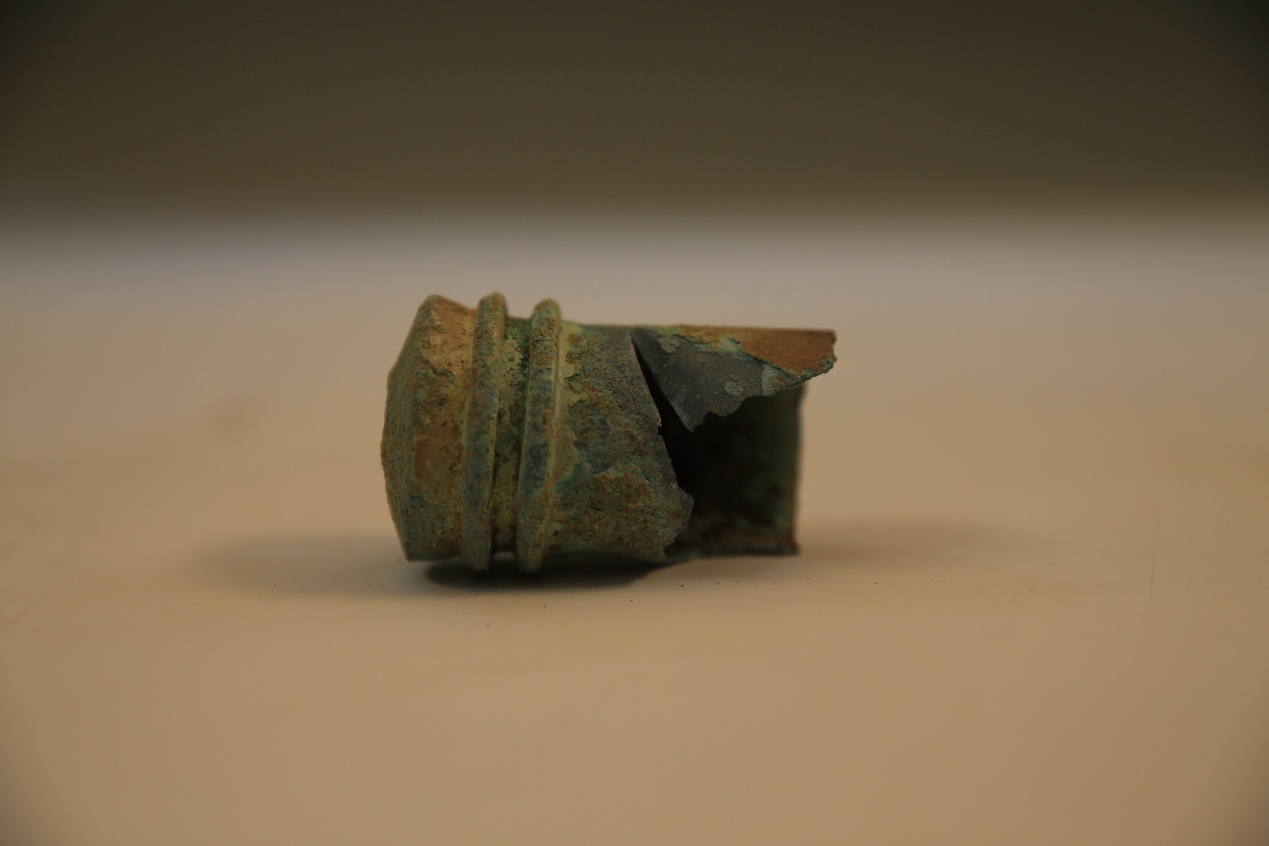


**17.jpg**
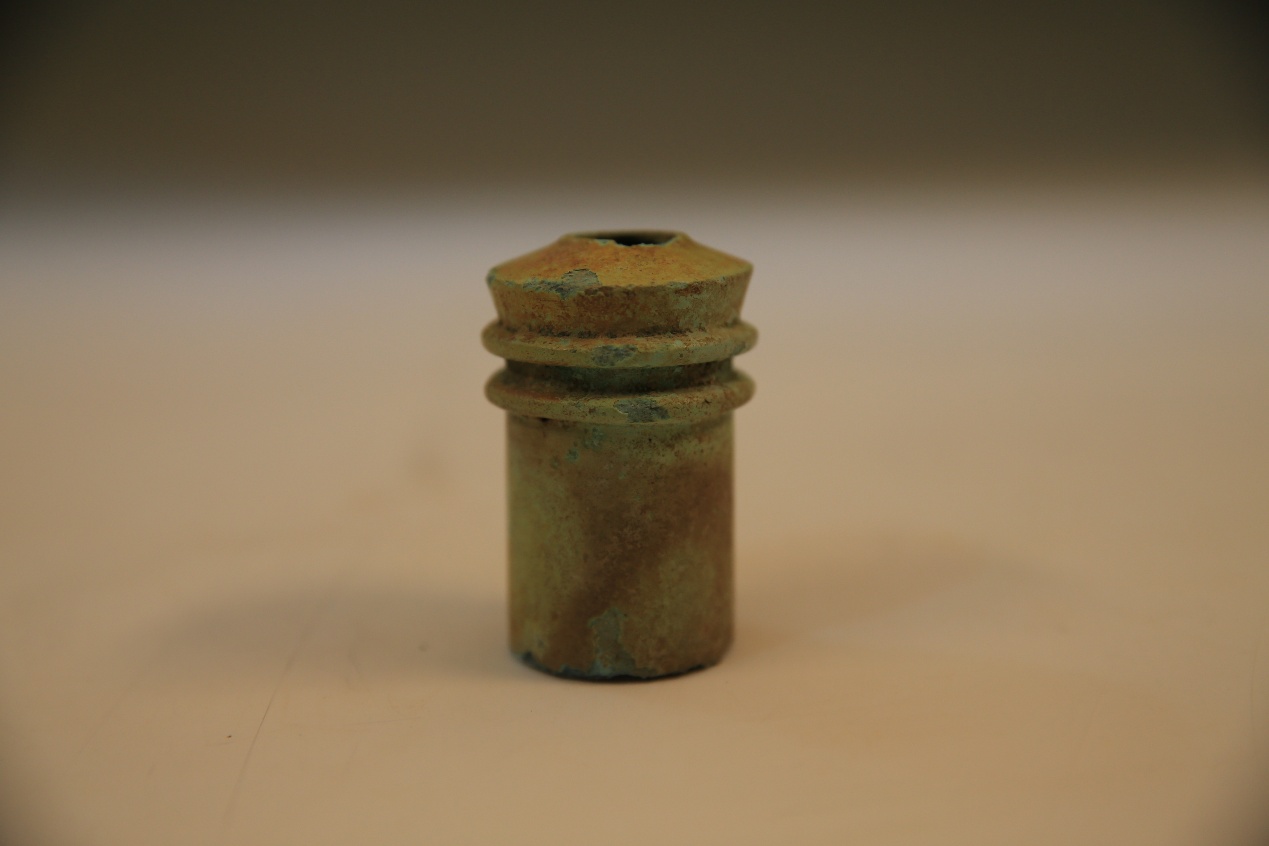


**18.jpg**
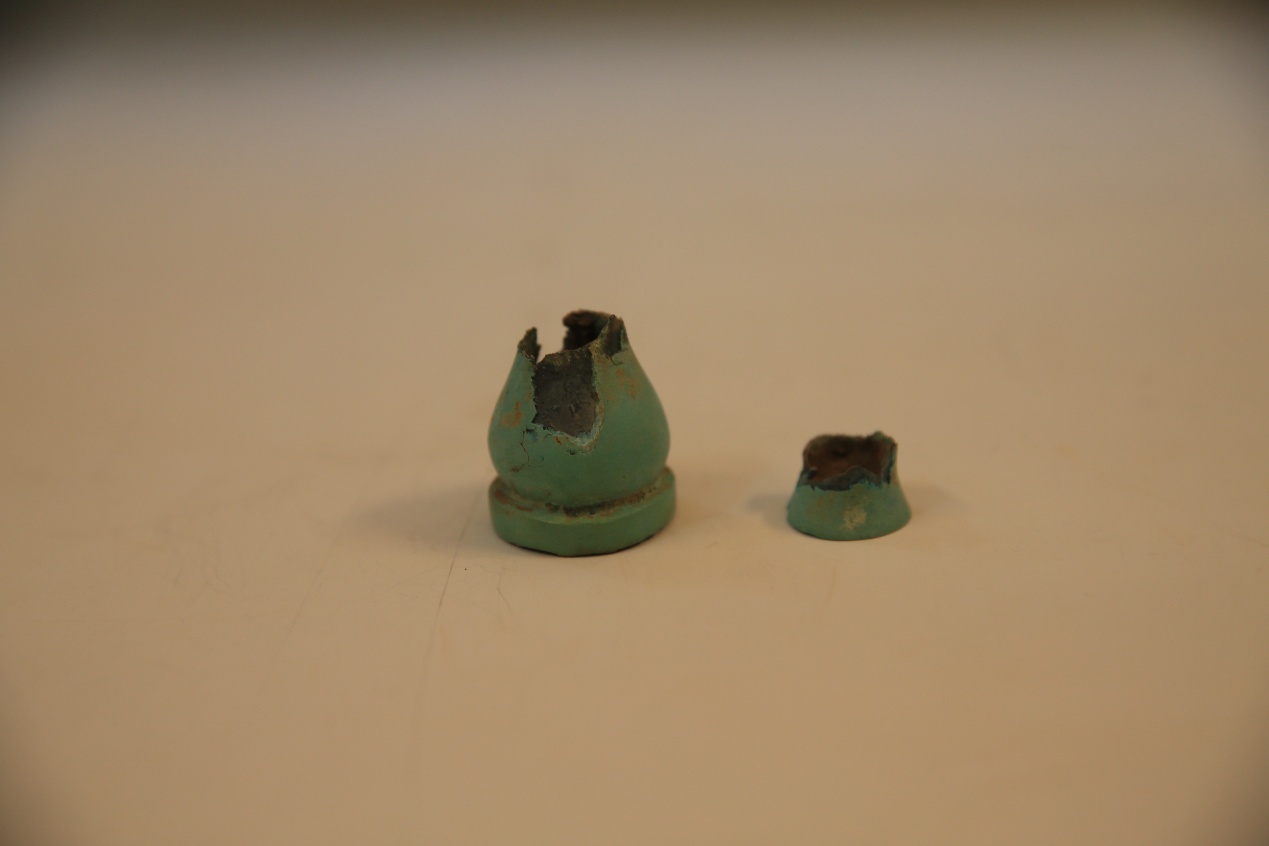


**19.jpg**
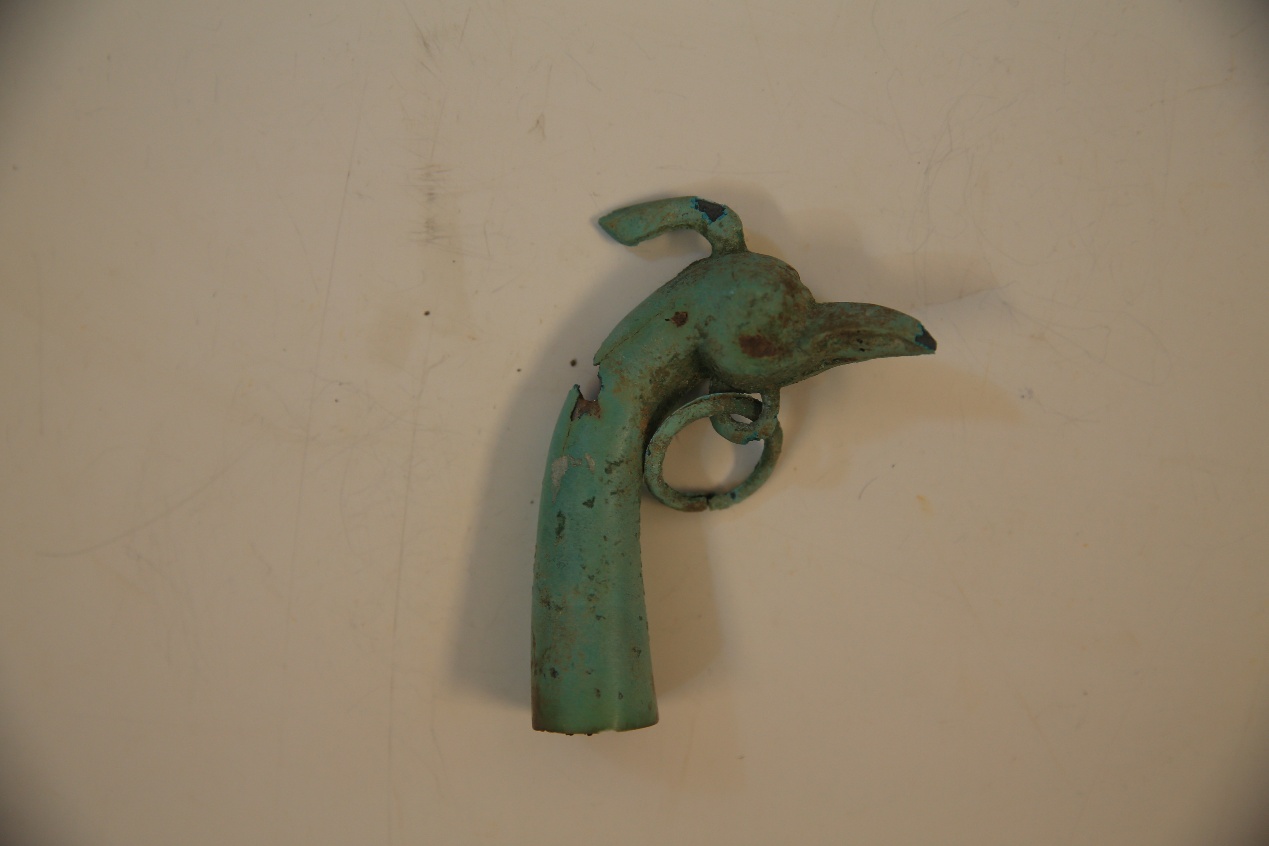


**20.jpg**
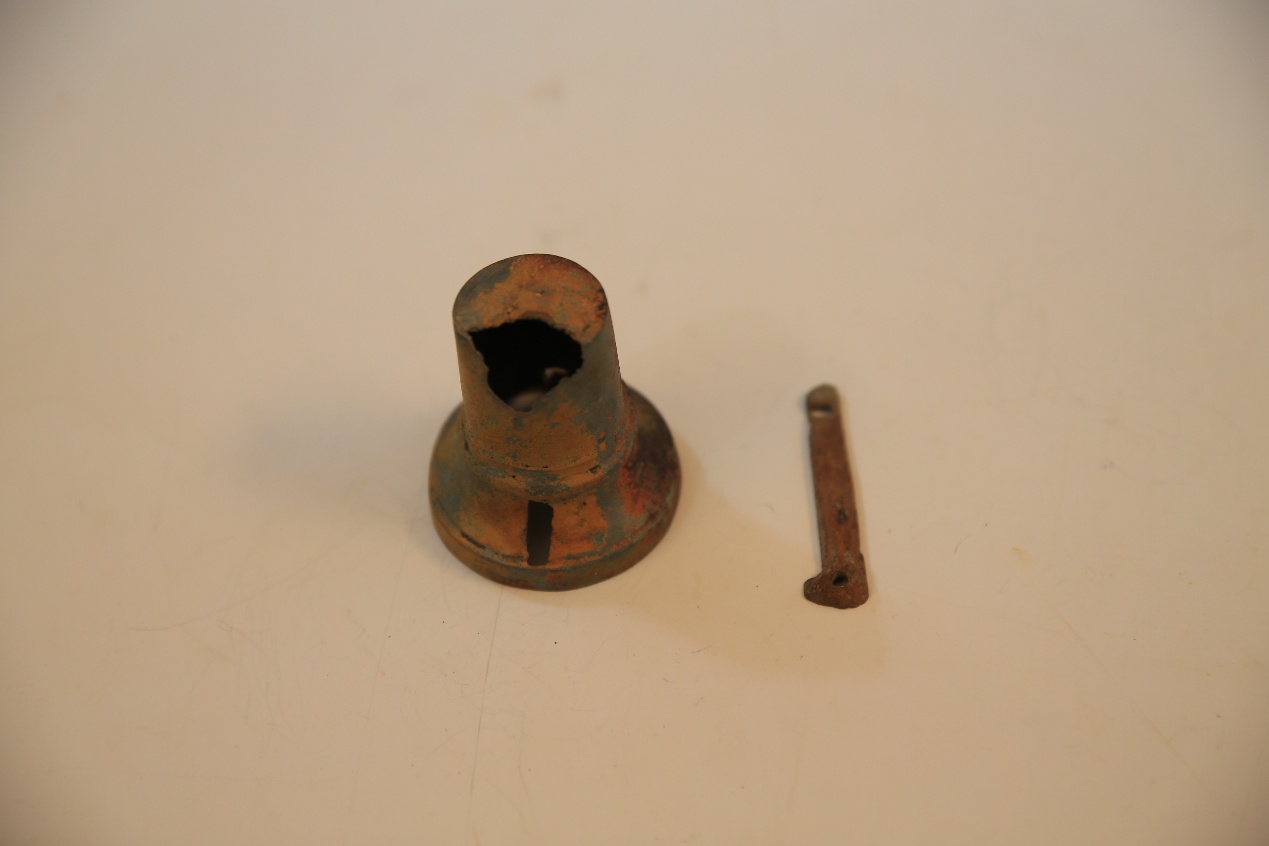


**21.jpg**
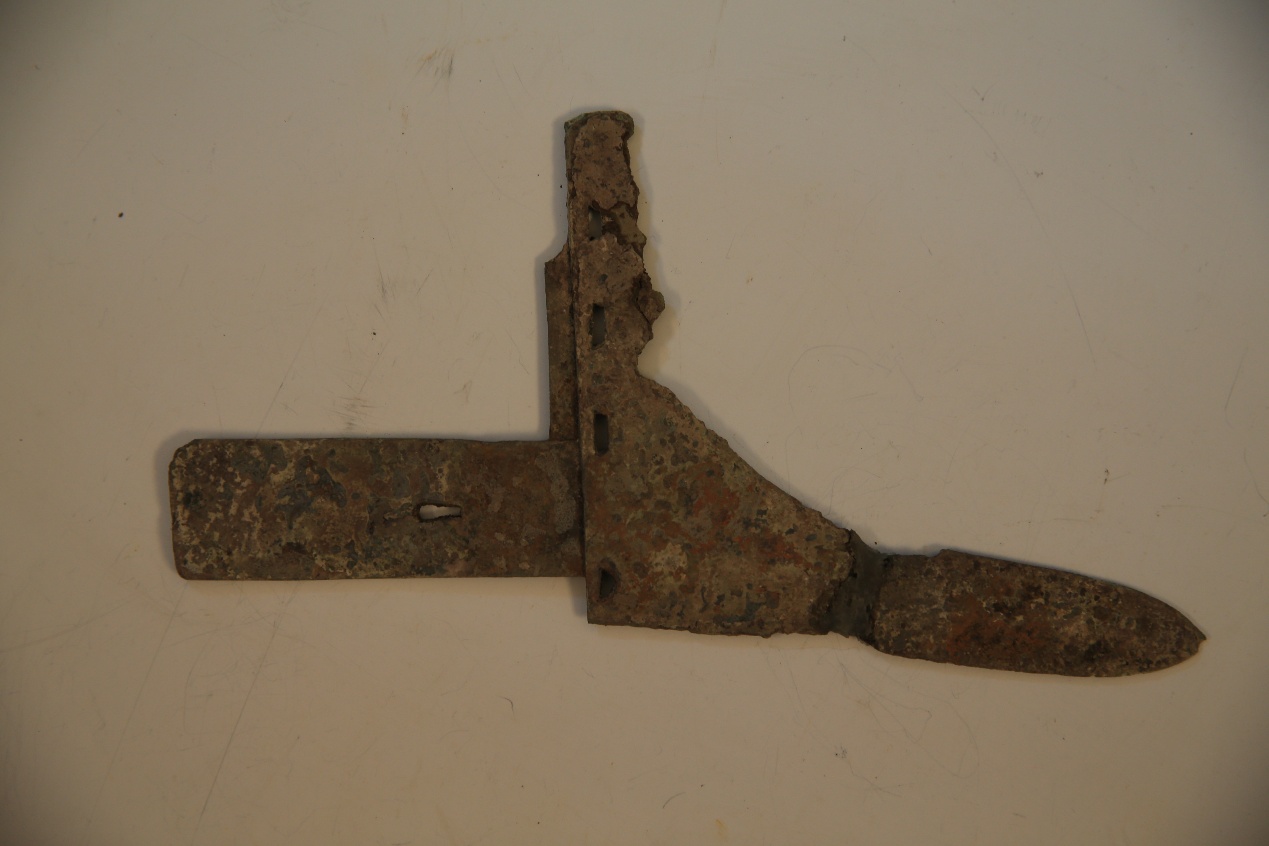


**22.jpg**
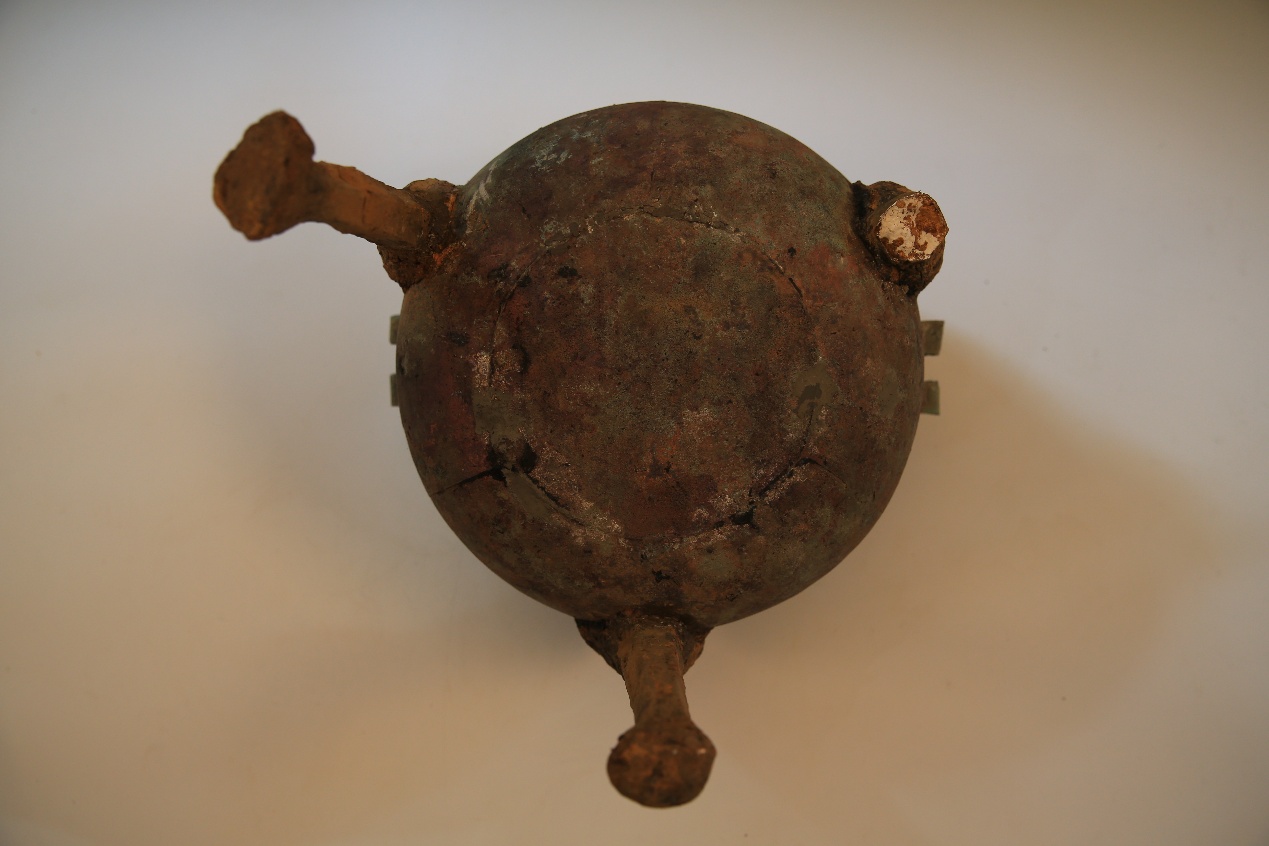


**23.jpg**
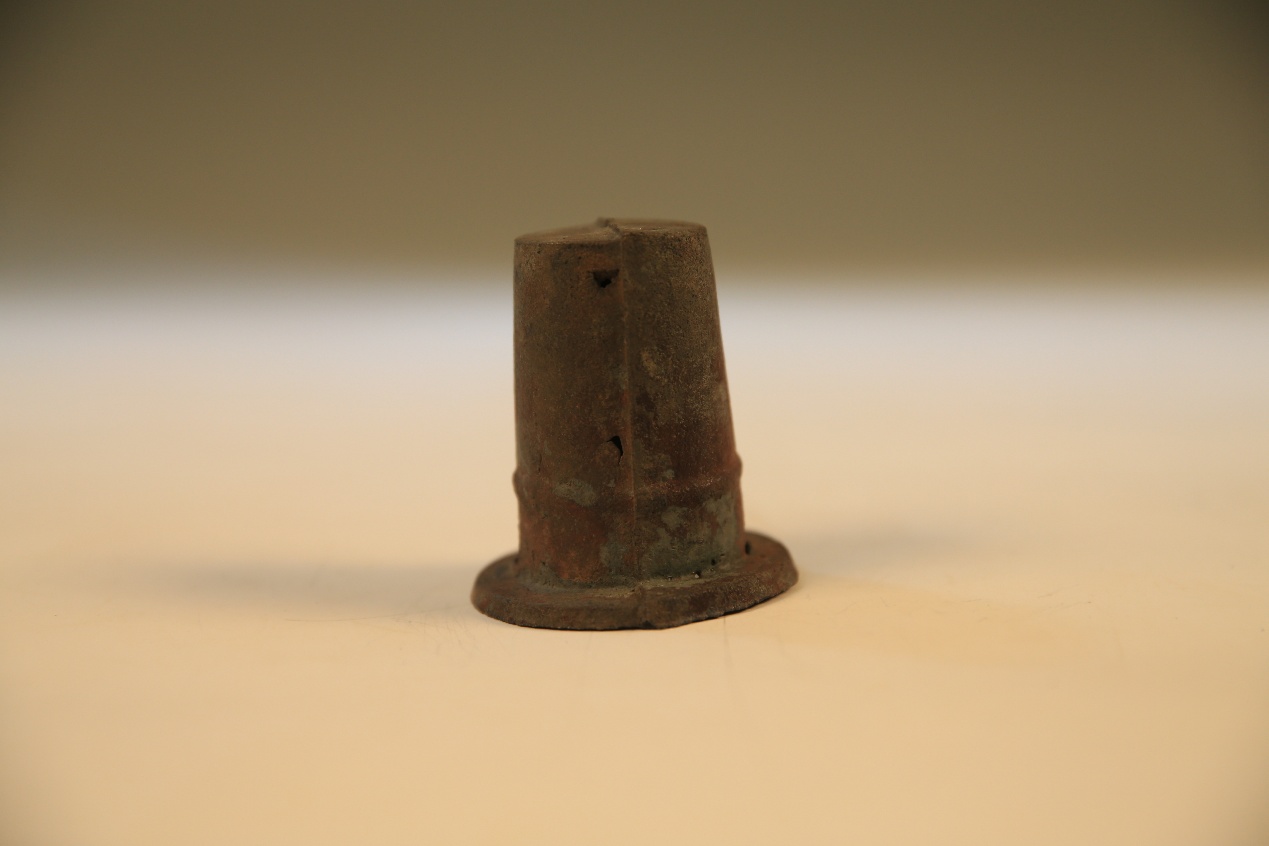


**24.jpg**
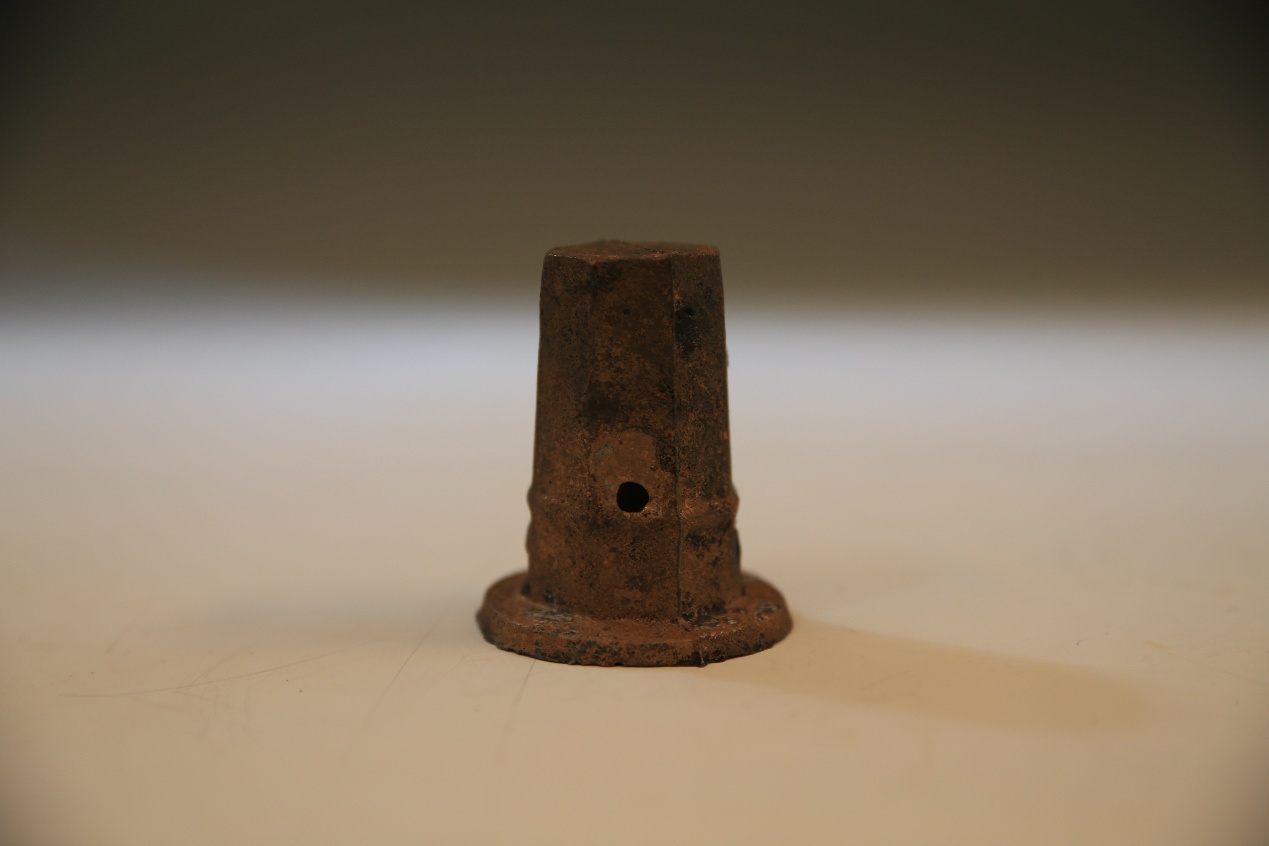


**25.jpg**
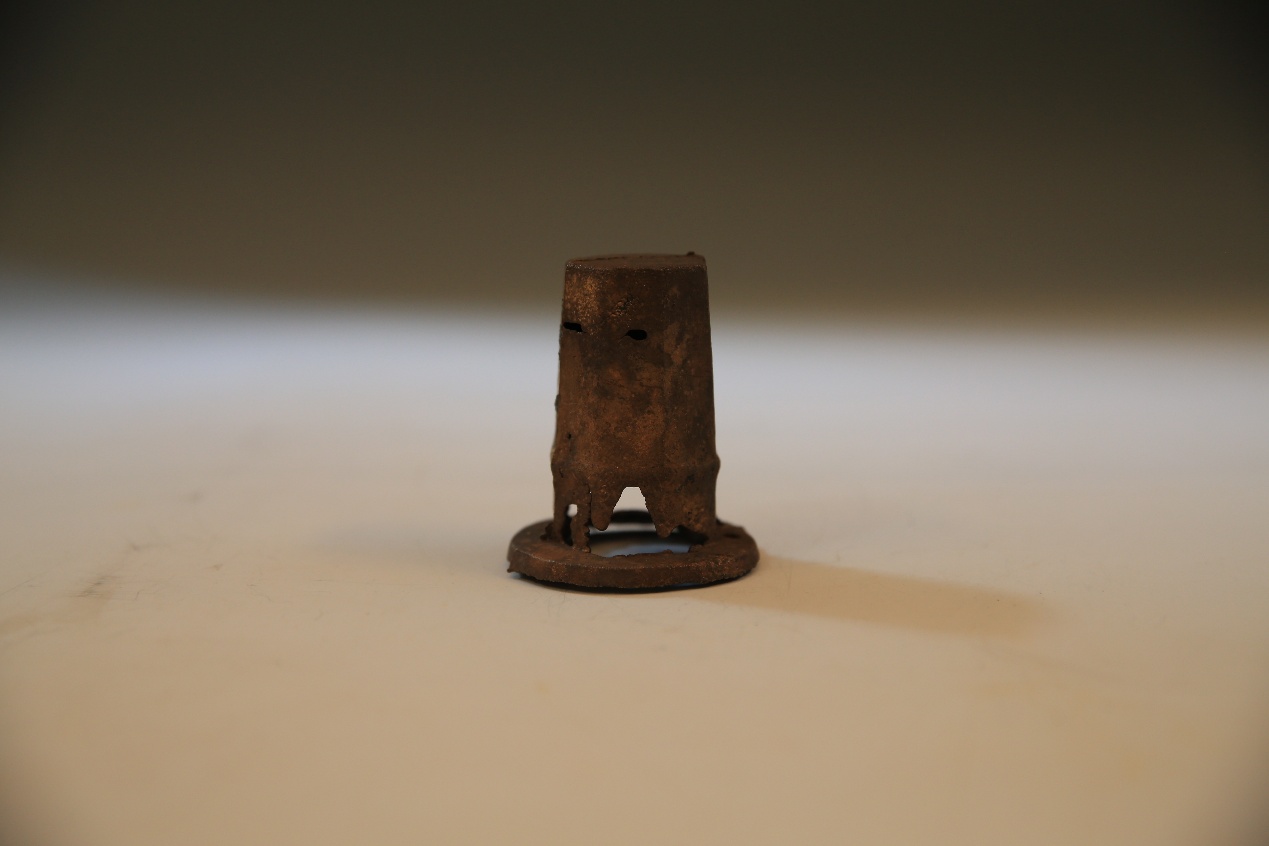


**26.jpg**
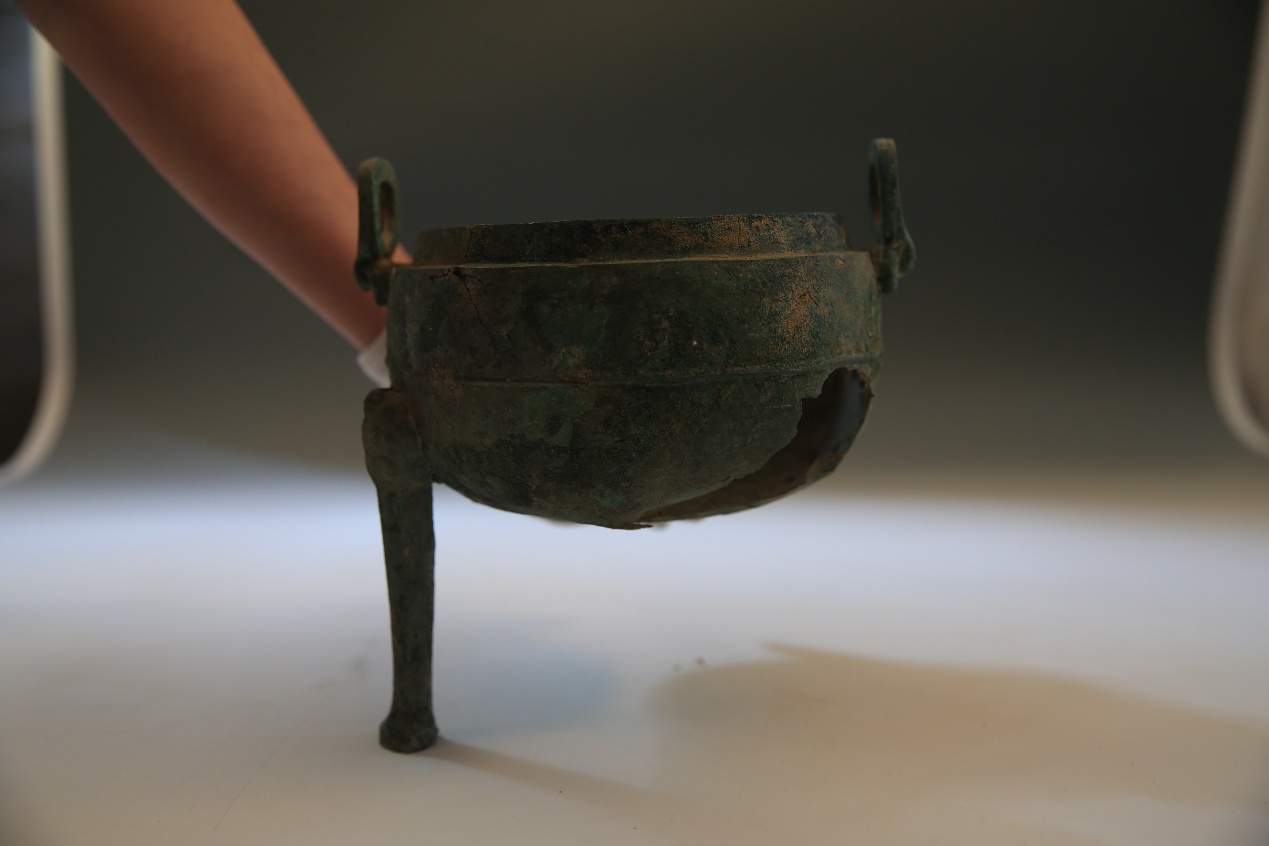


**27.jpg**
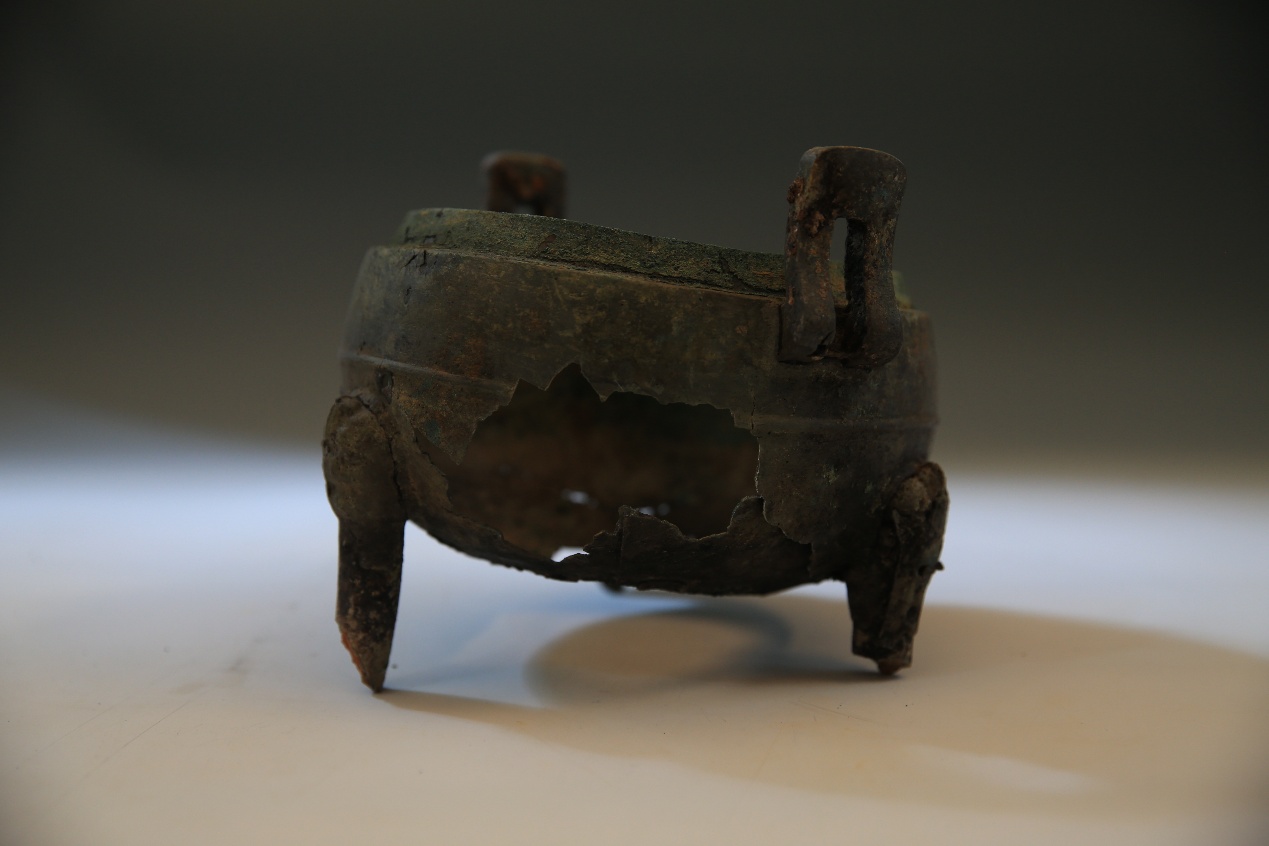


**28.jpg**
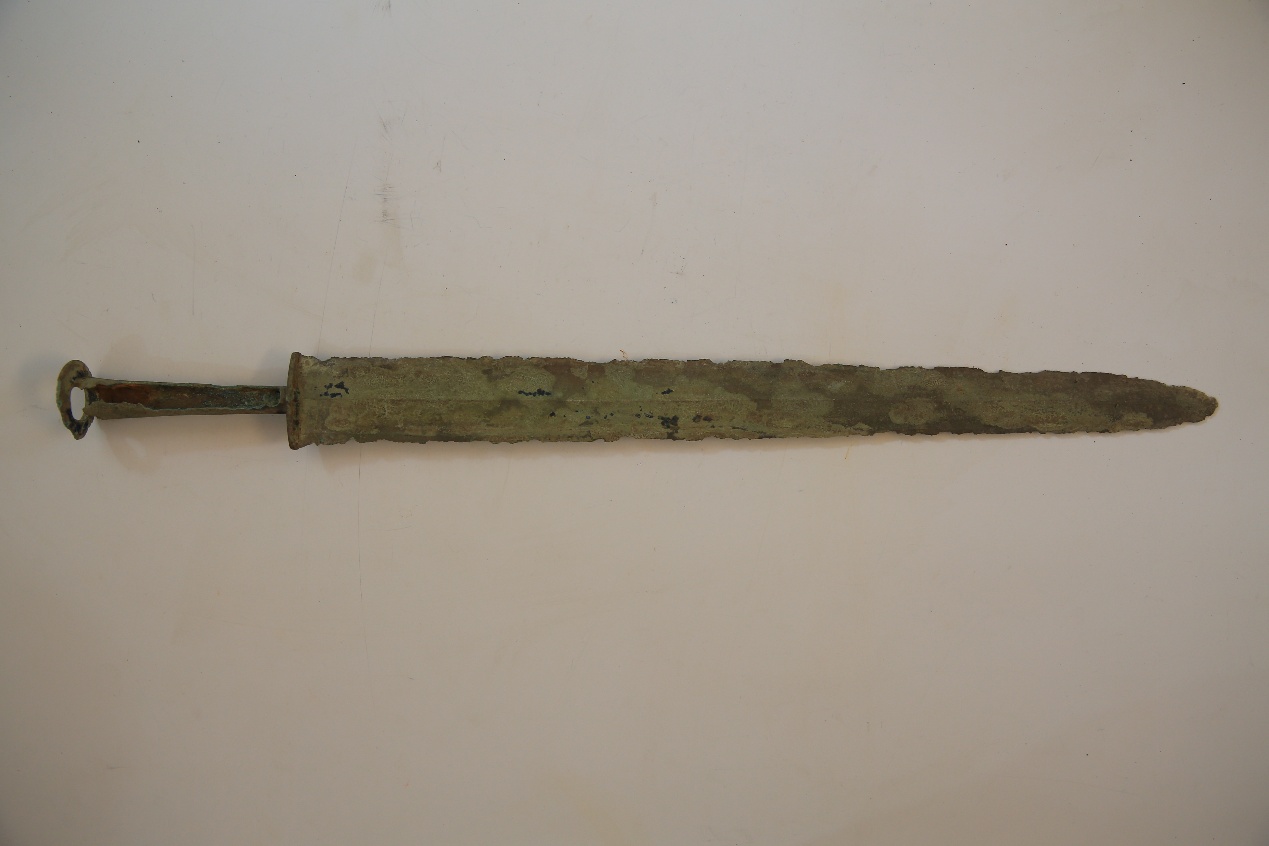


**29.jpg**
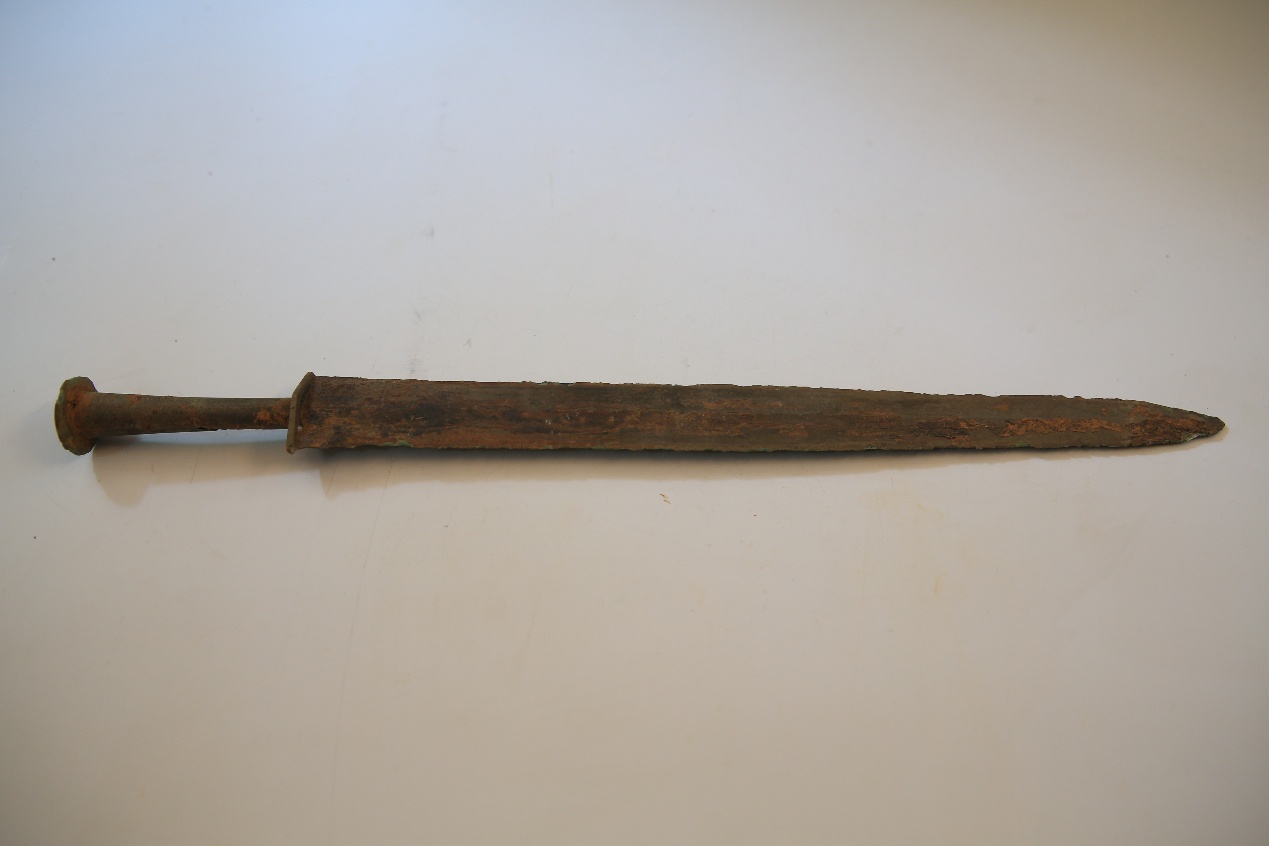


**30.jpg**
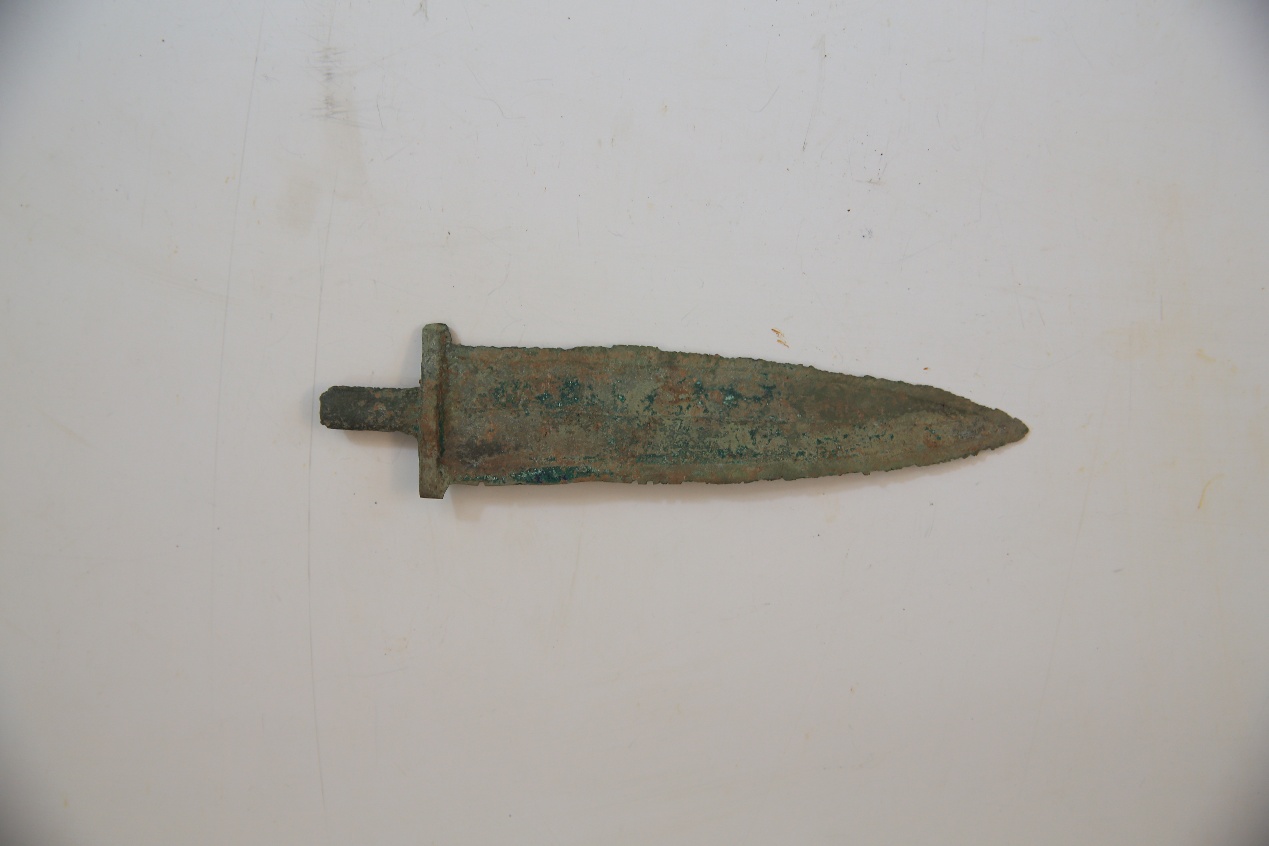


**31.jpg**
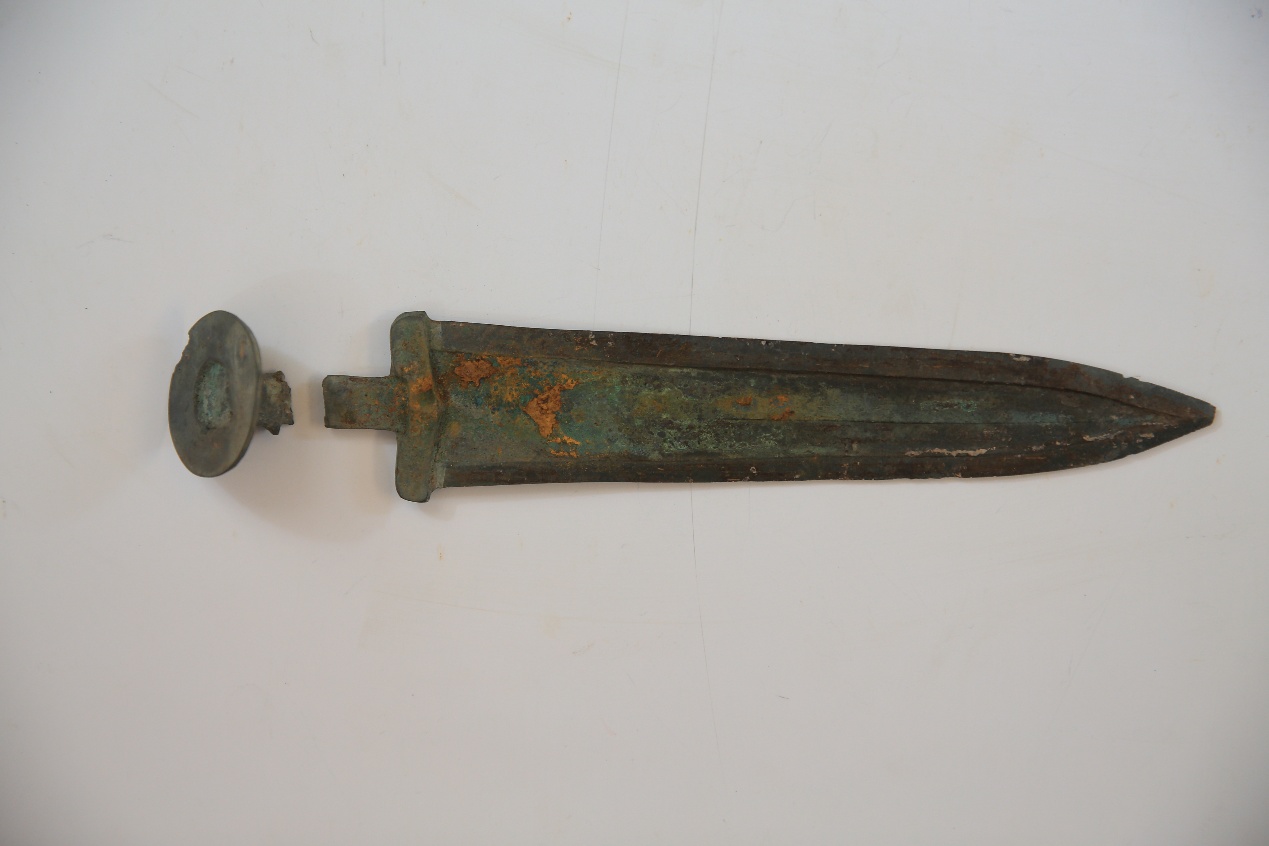


**32.jpg**
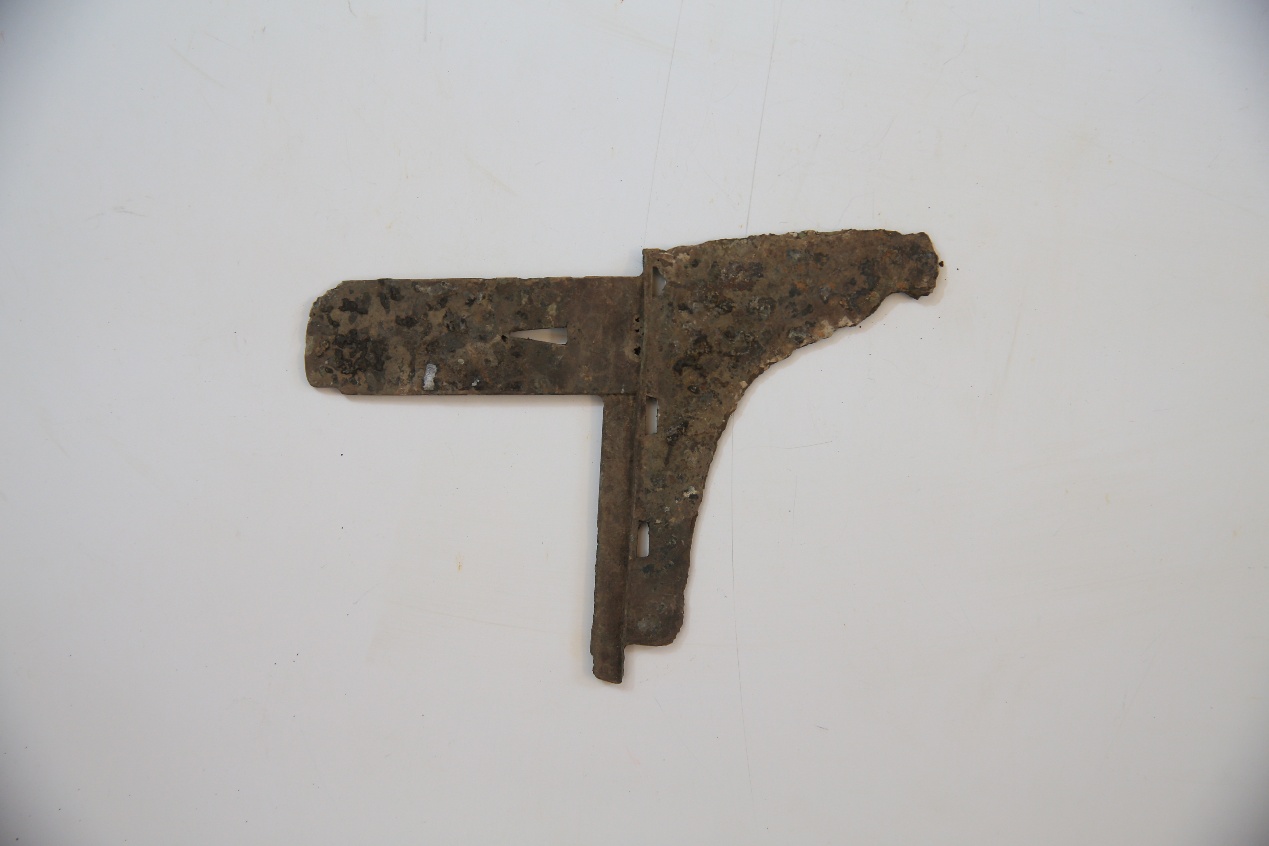


**33.jpg**
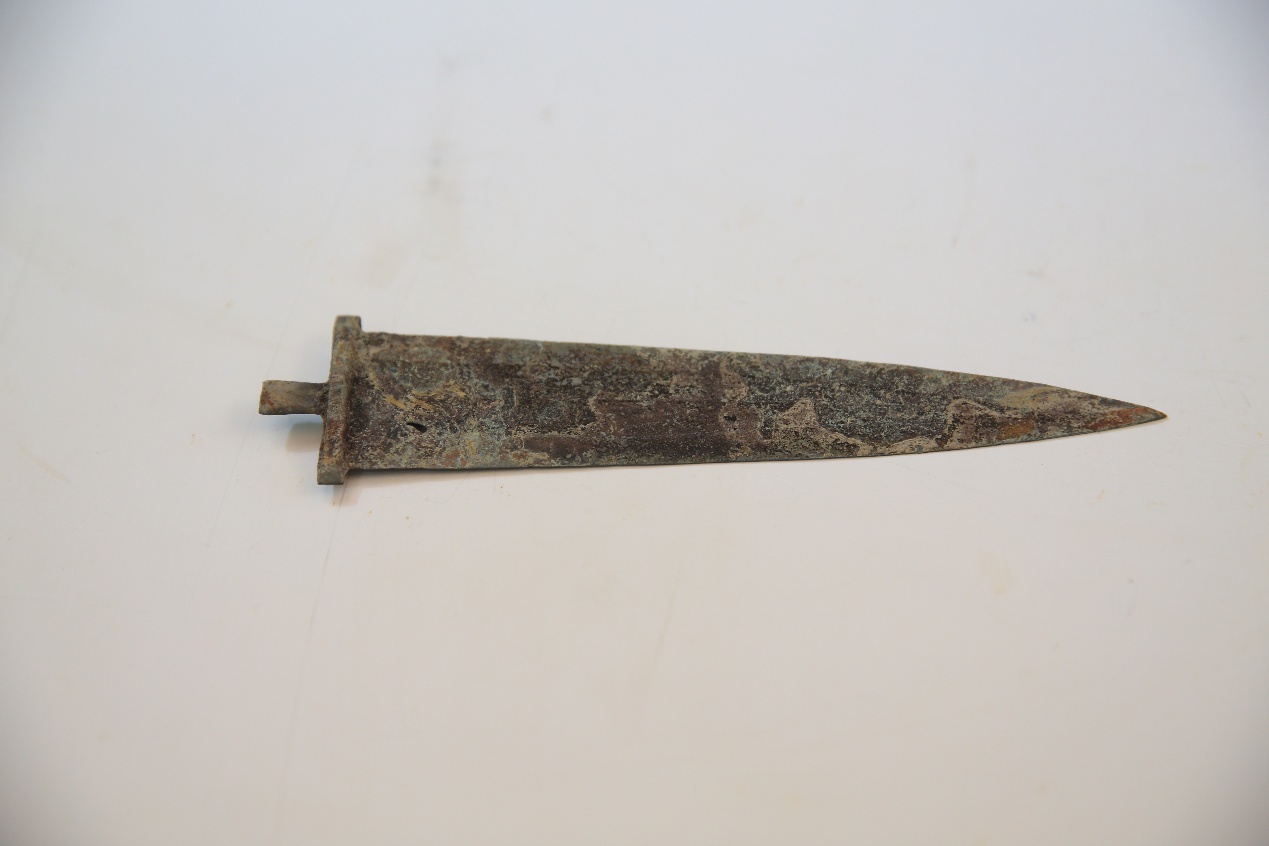


**34.jpg**
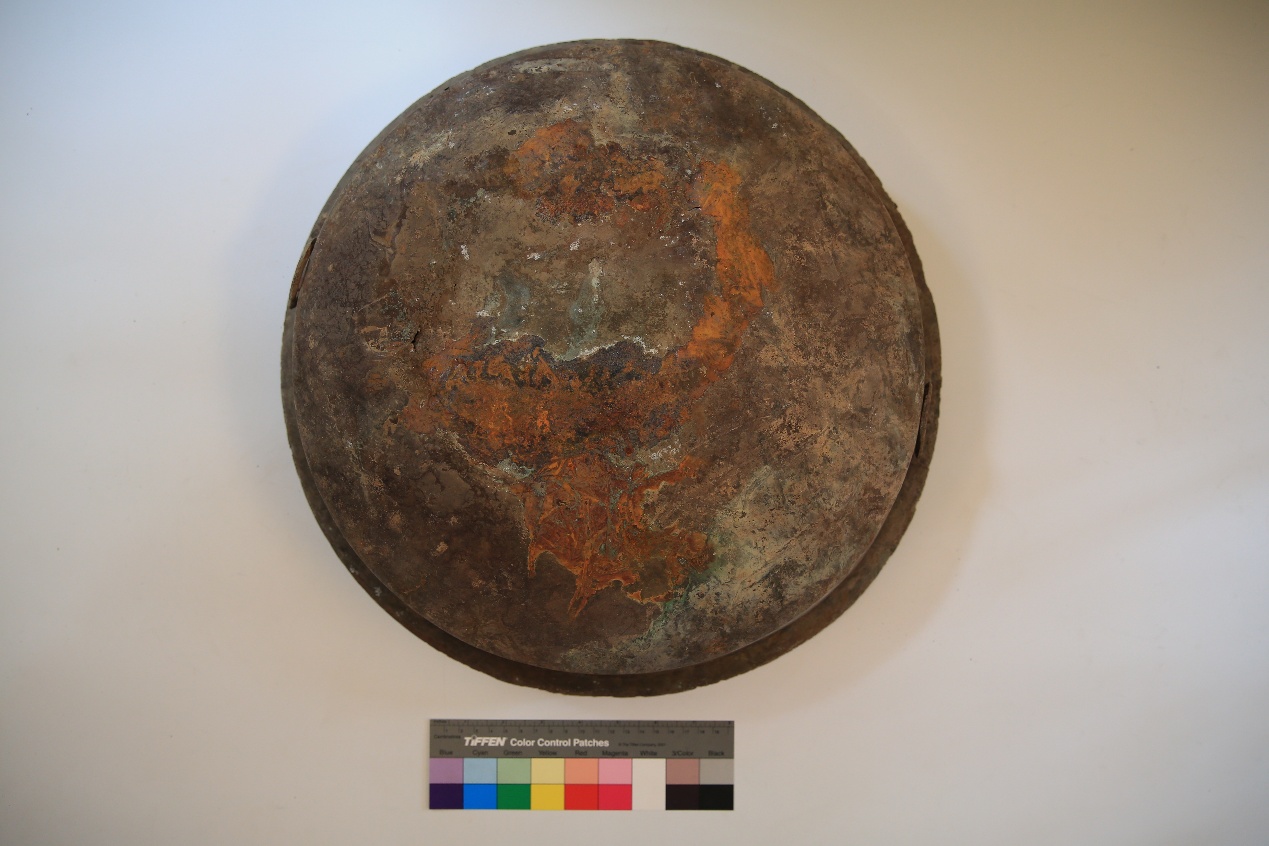


**35.jpg**
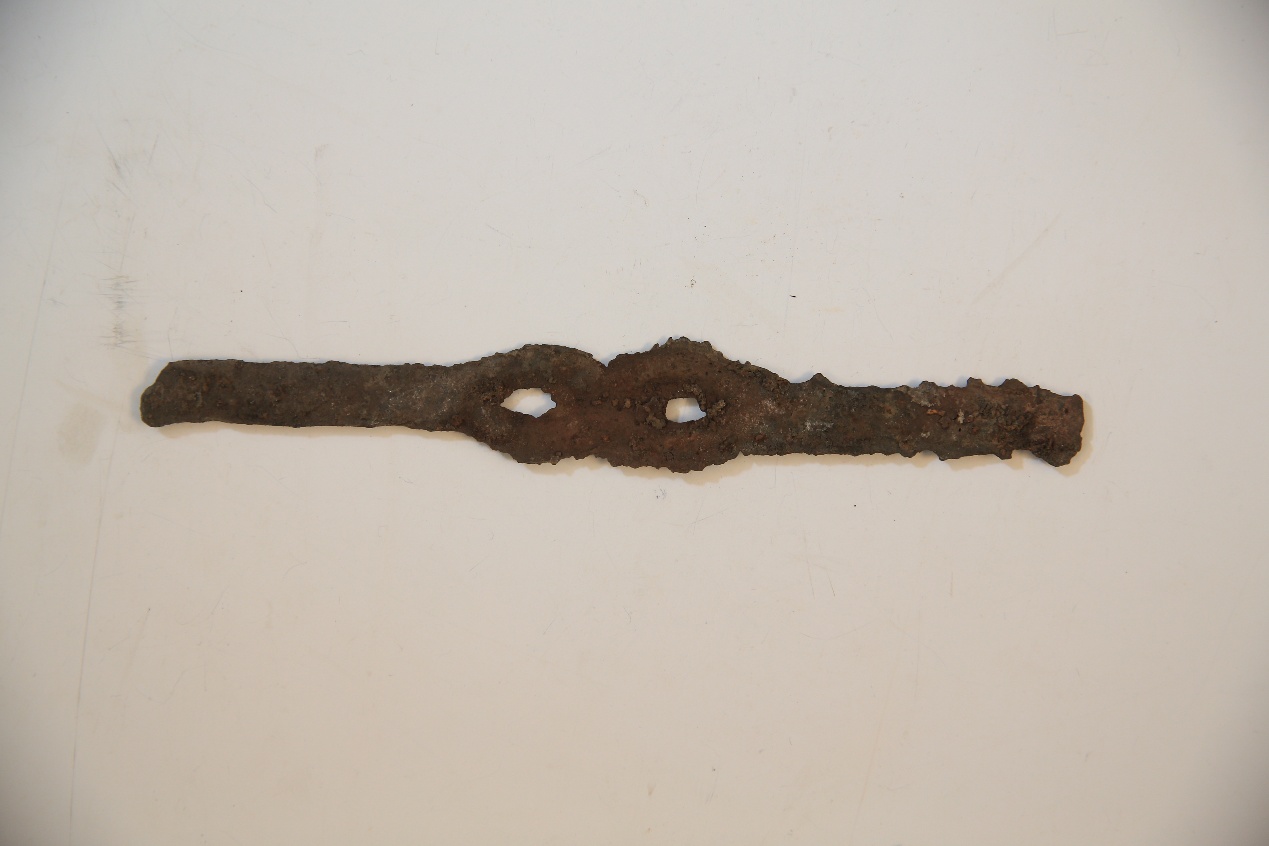


**36.jpg**
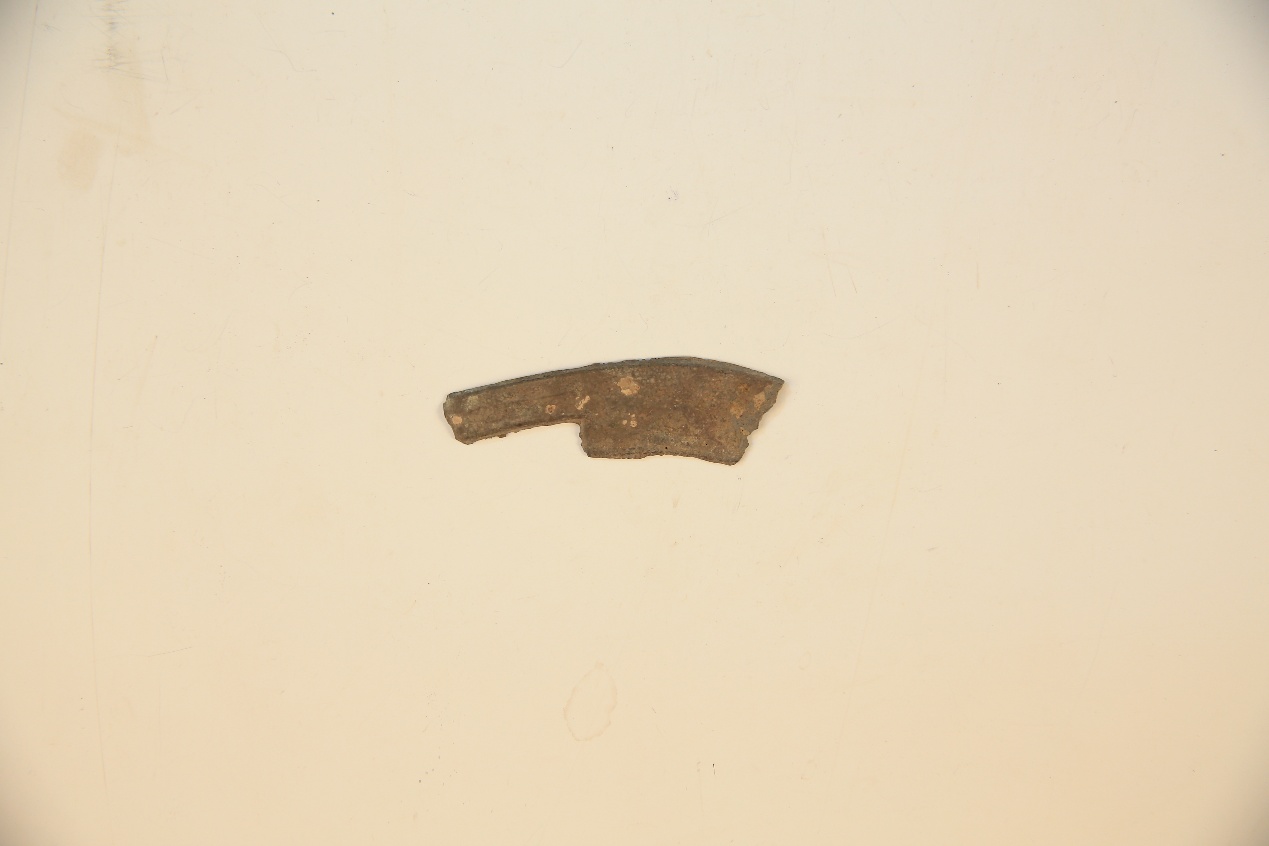


**37.jpg**
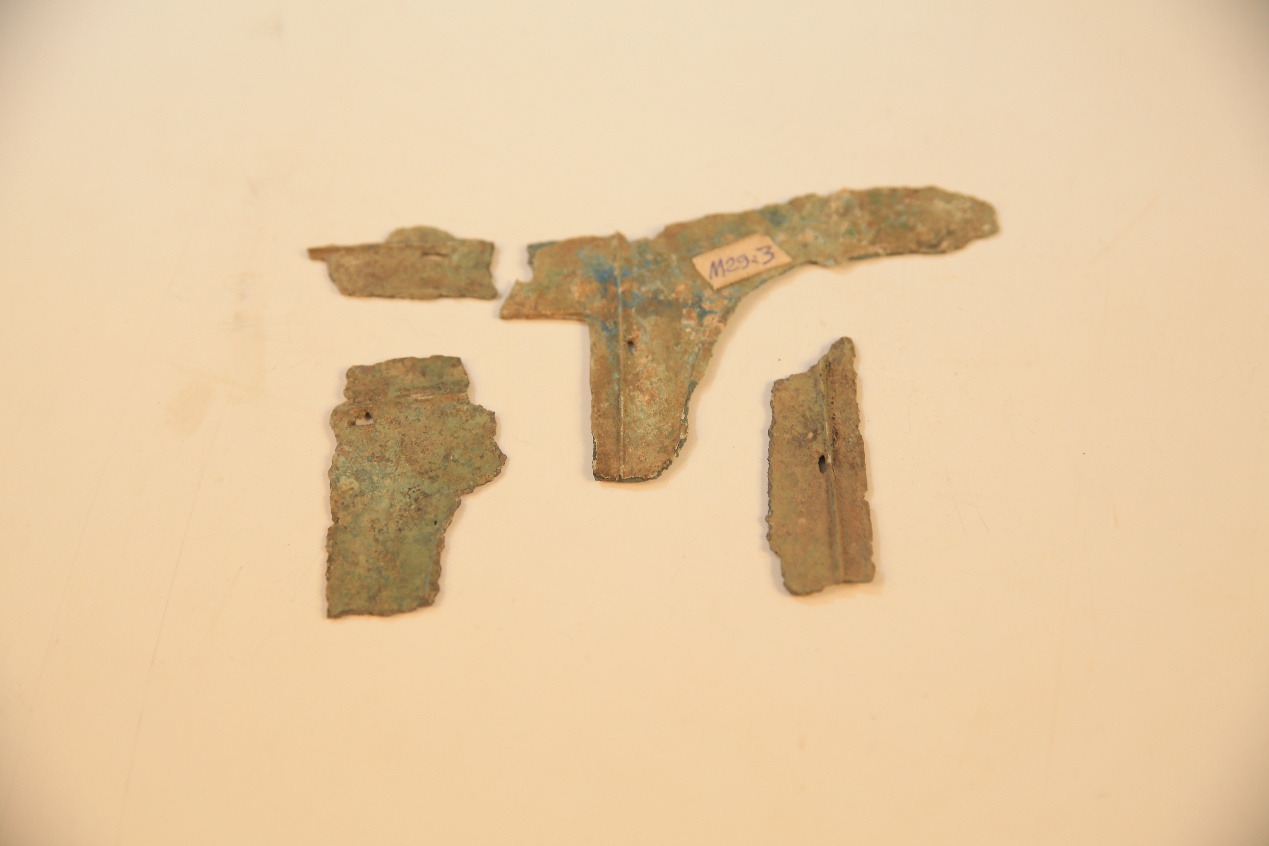


**38.jpg**
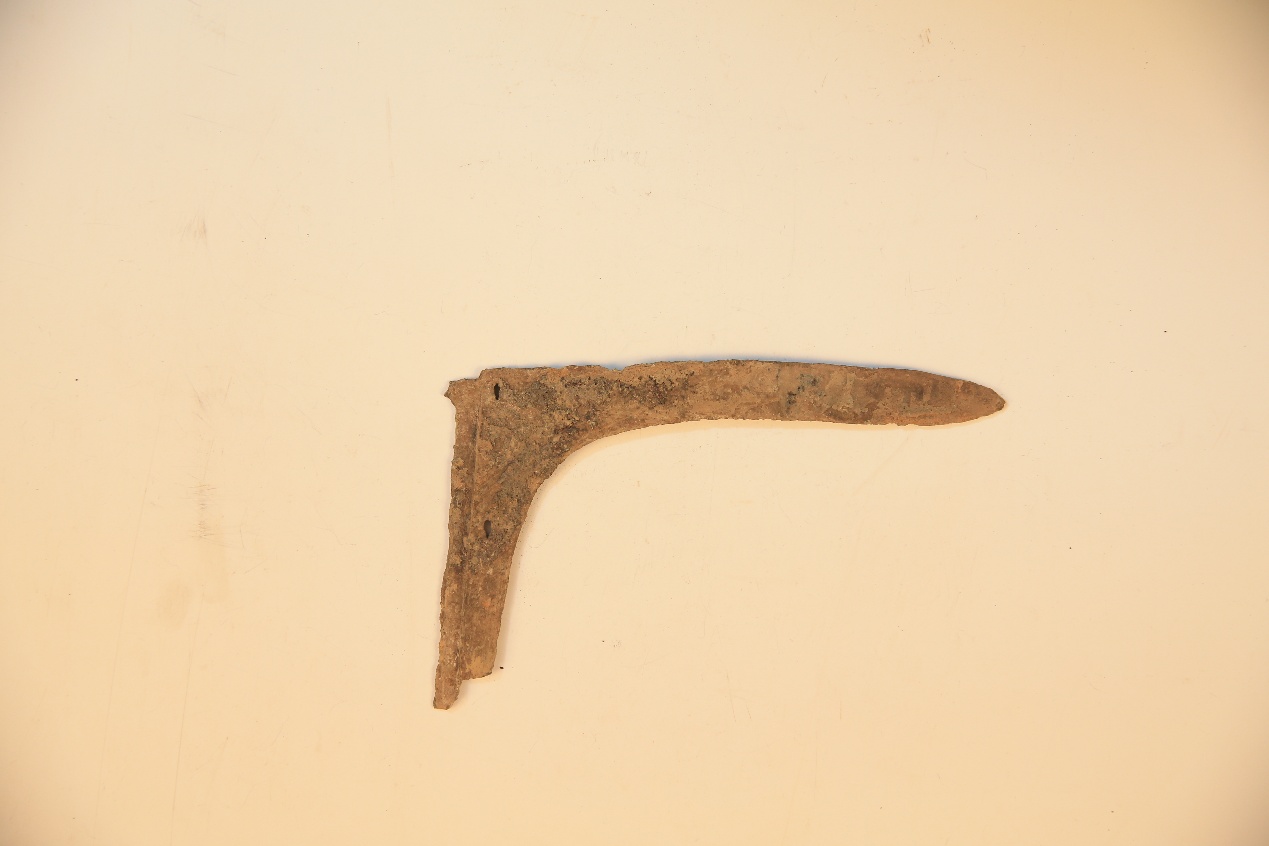


**39.jpg**
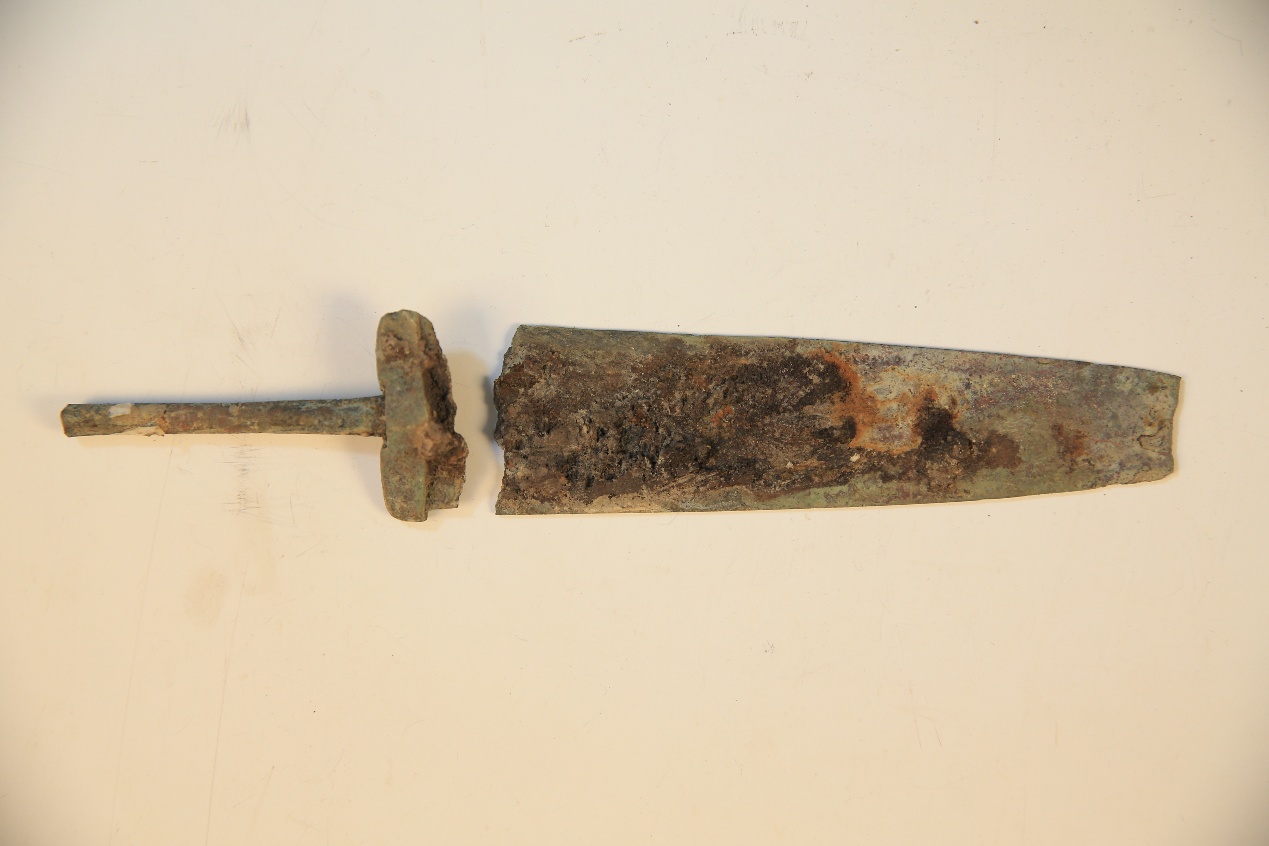


**40.jpg**
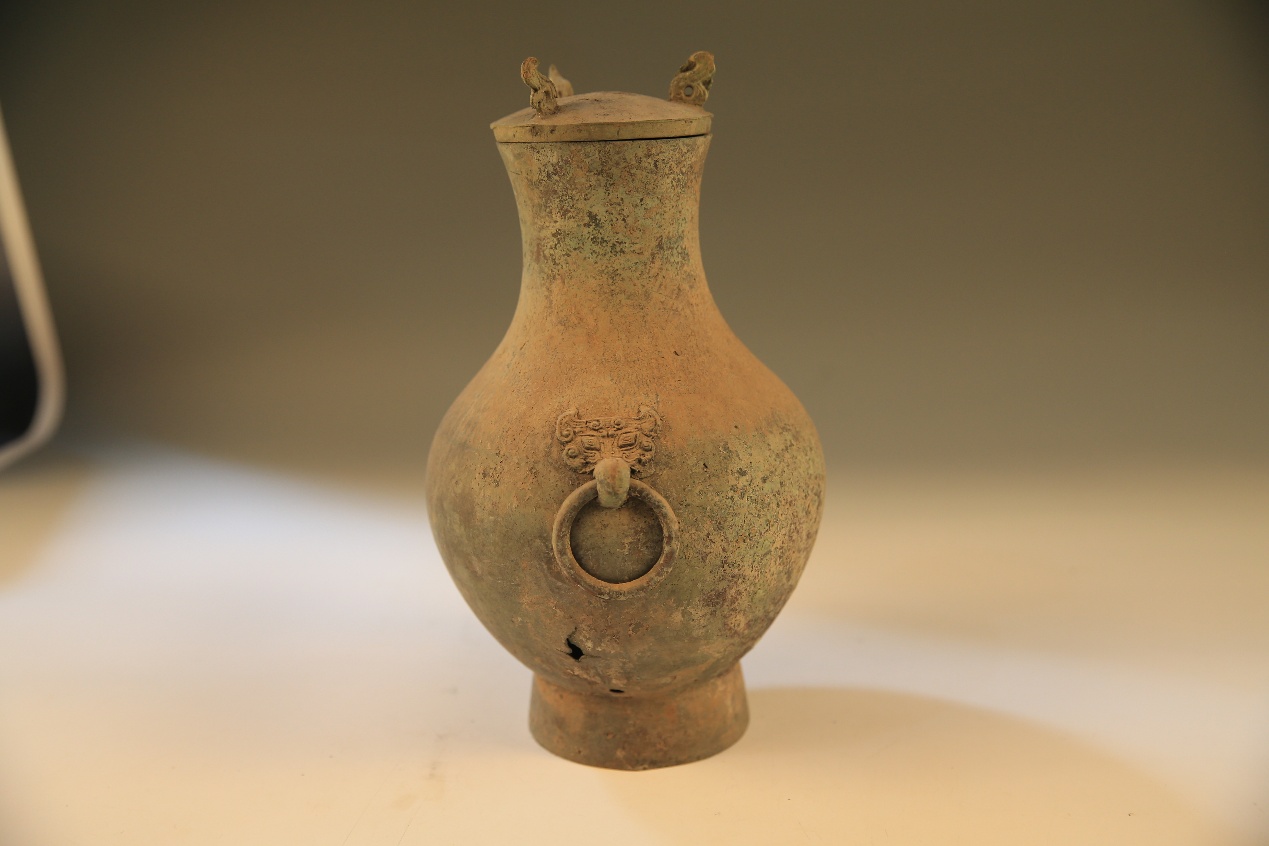


**41.jpg**
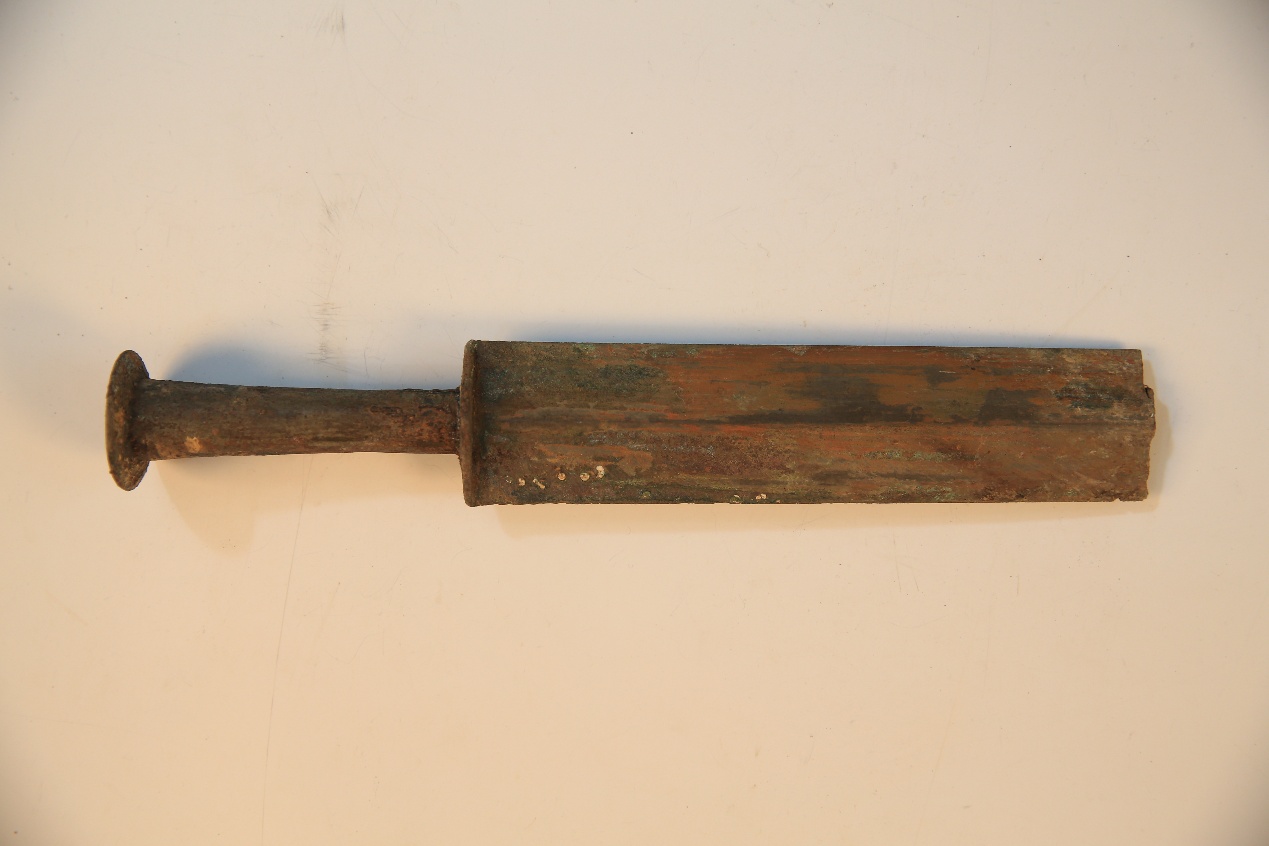


**42.jpg**
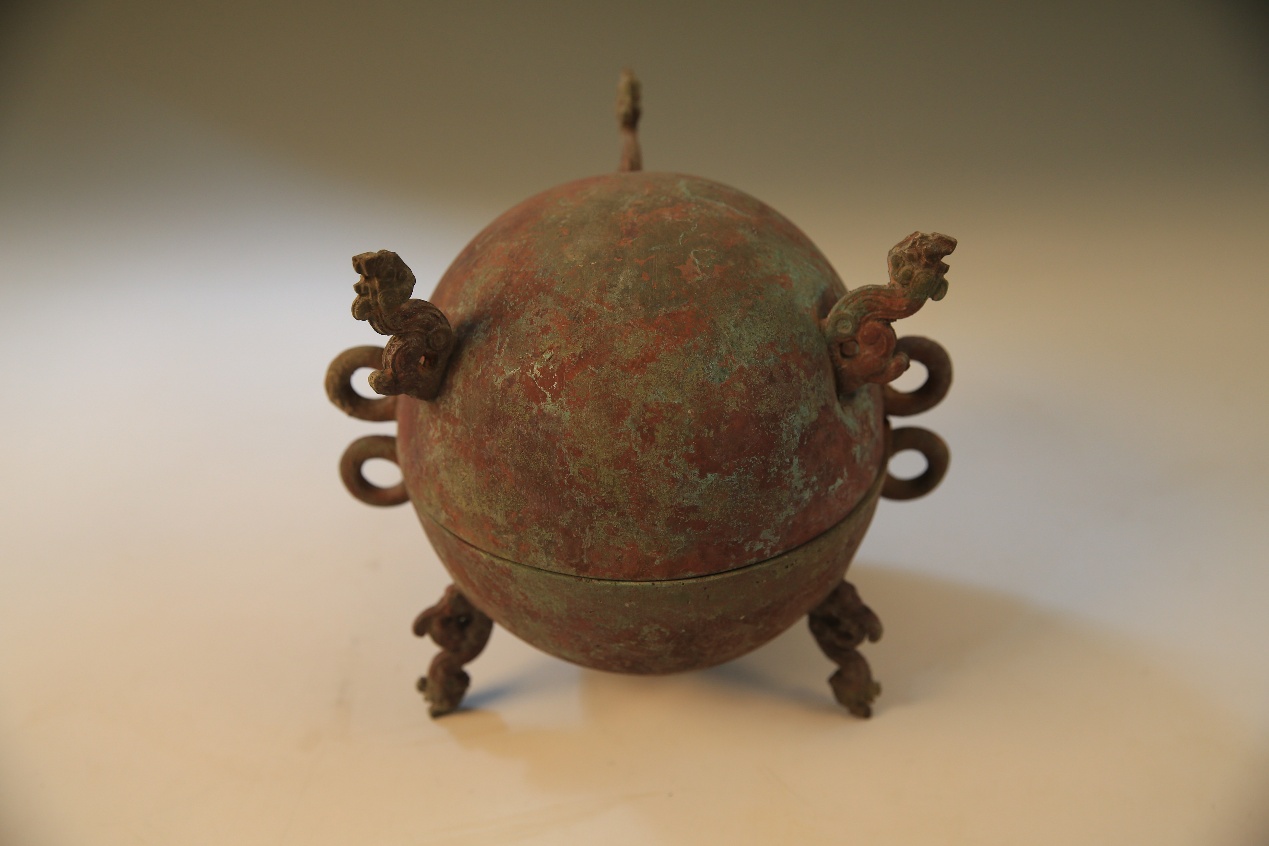


**43.jpg**
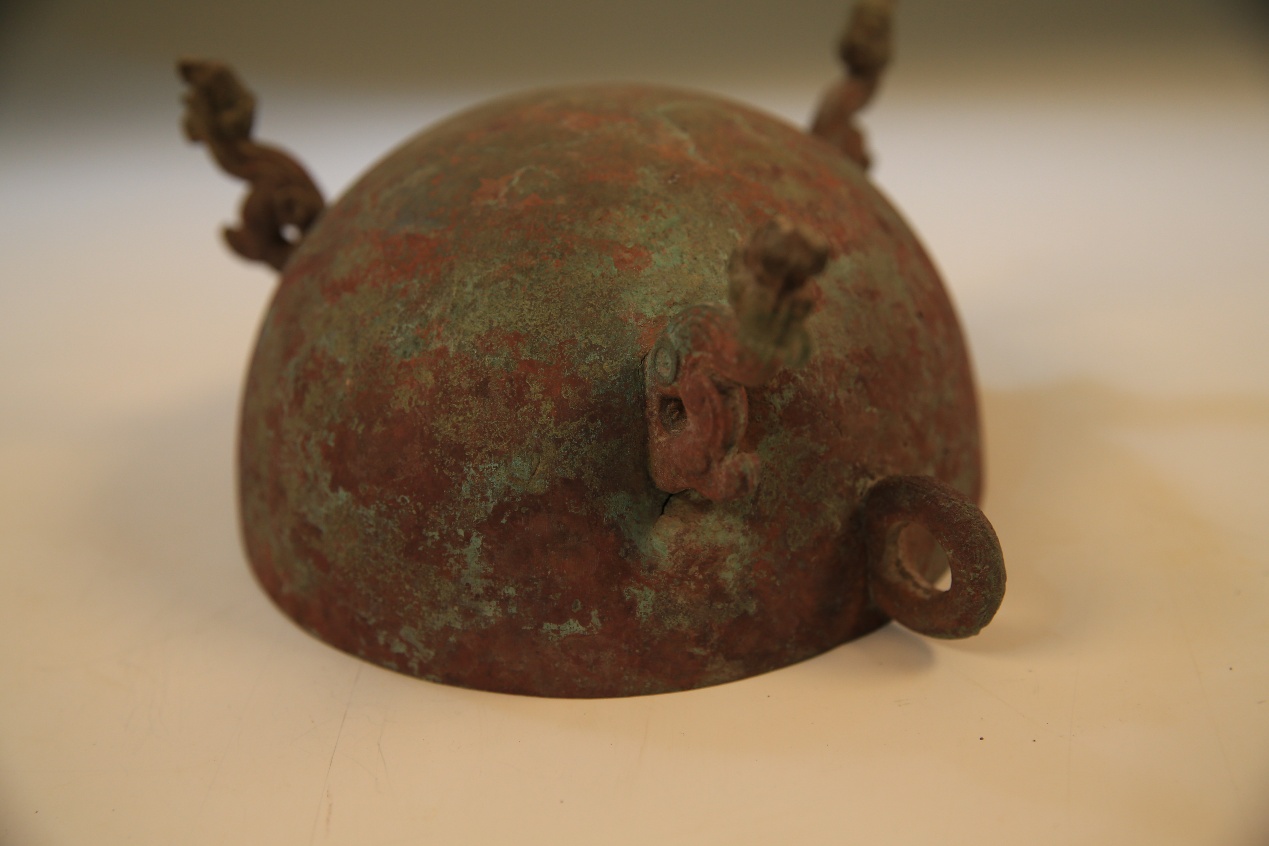


**44.jpg**
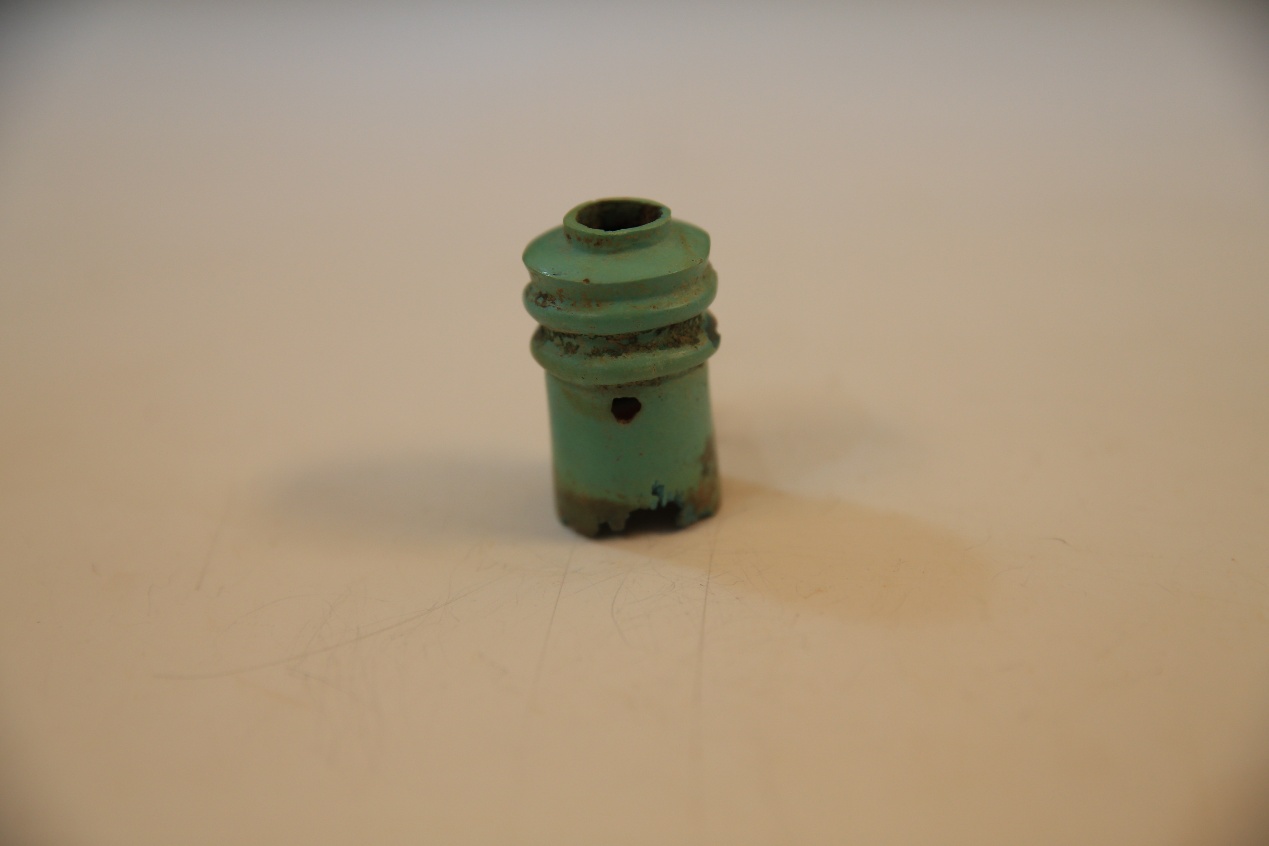


**45.jpg**
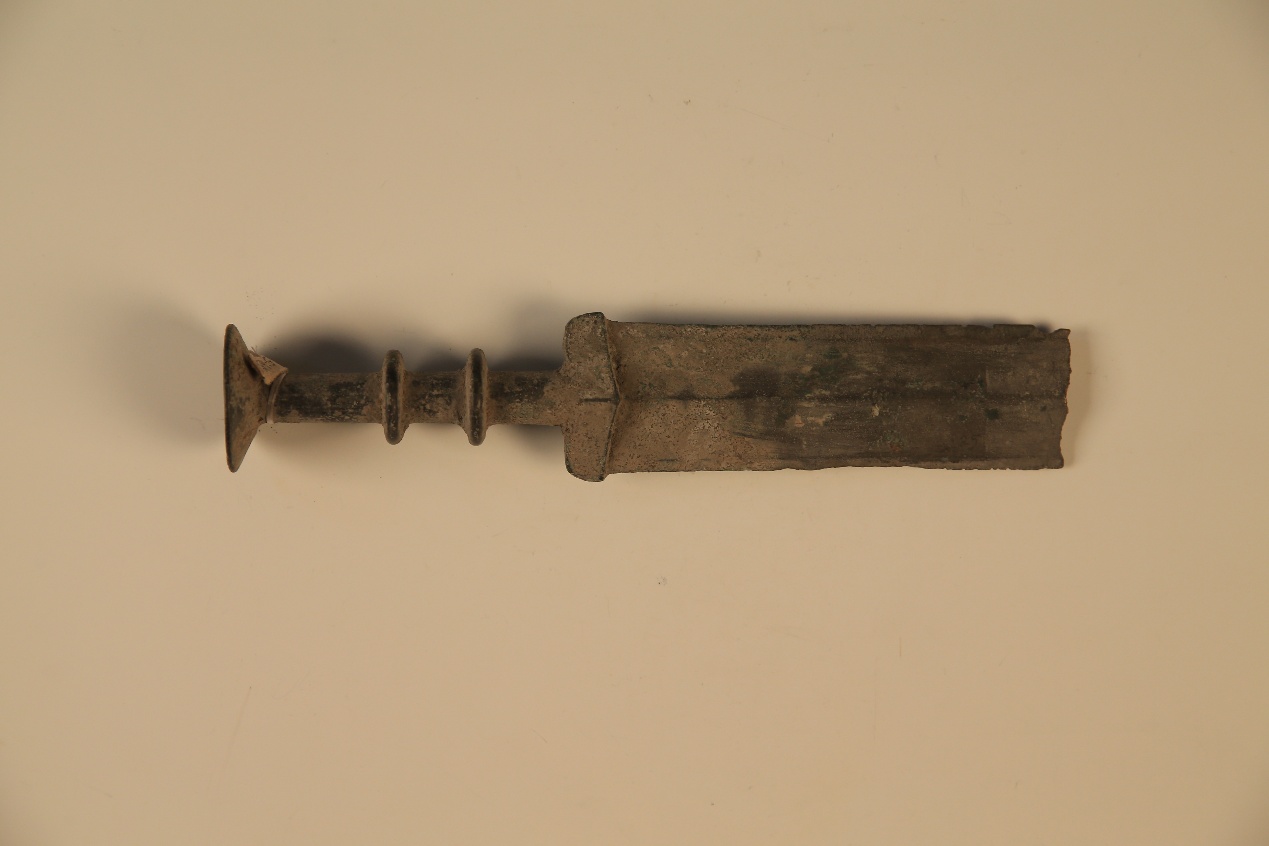


# Train set

## cracking(105).jpg


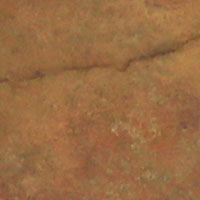


## cracking(106).jpg


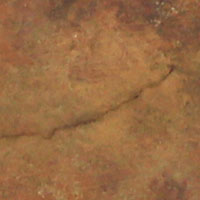


## cracking(108).jpg


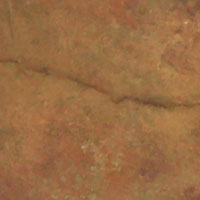


## cracking(11).jpg


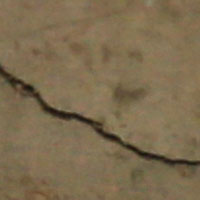


## cracking(111).jpg


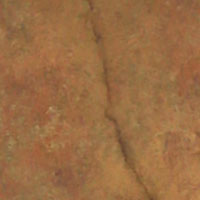


## cracking(12).jpg


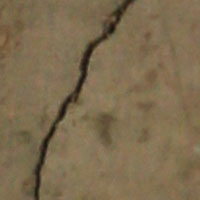


## cracking(120).jpg


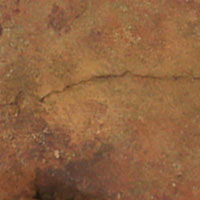


## cracking(122).jpg


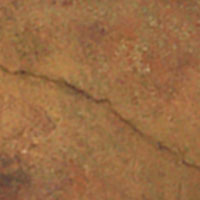


## cracking(123).jpg


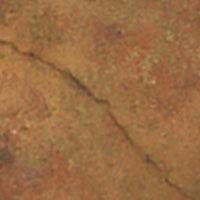


## cracking(124).jpg


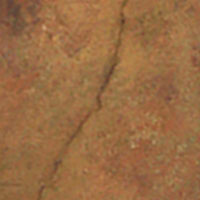


## cracking(126).jpg


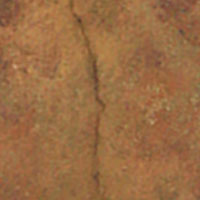


## cracking(13).jpg


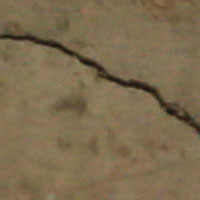


## cracking(134).jpg


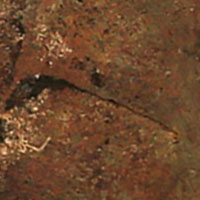


## cracking(138).jpg


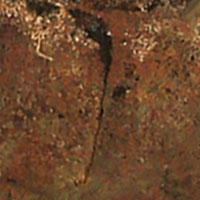


## cracking(142).jpg


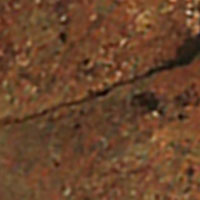


## cracking(16).jpg


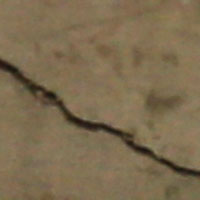


## cracking(160).jpg


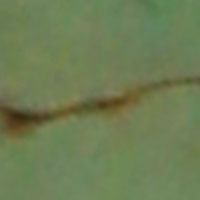


## cracking(161).jpg


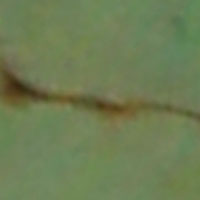


## cracking(163).jpg


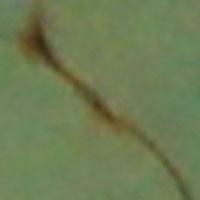


## cracking(165).jpg


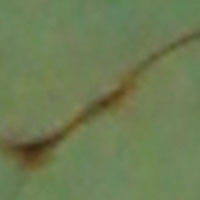


## cracking(166).jpg


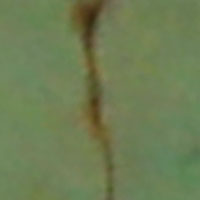


## cracking(167).jpg


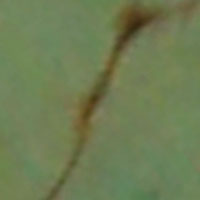


## cracking(168).jpg


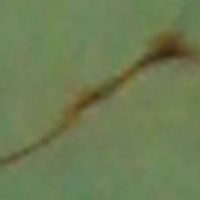


## cracking(170).jpg


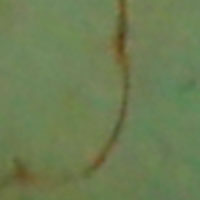


## cracking(171).jpg


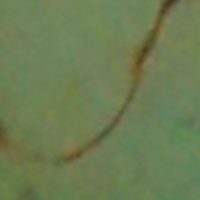


## cracking(172).jpg


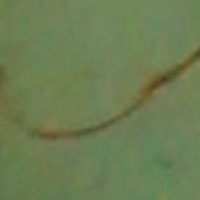


## cracking(173).jpg


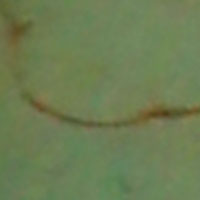


## cracking(174).jpg


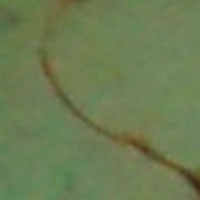


## cracking(175).jpg


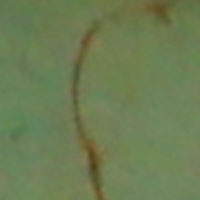


## cracking(176).jpg


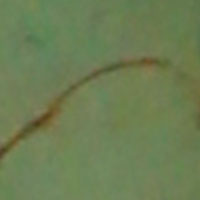


## cracking(177).jpg


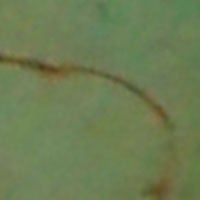


## cracking(18).jpg


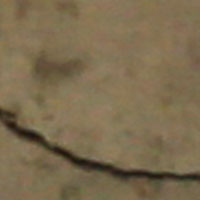


## cracking(181).jpg


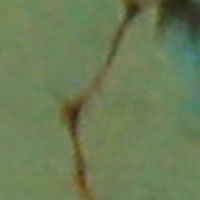


## cracking(182).jpg


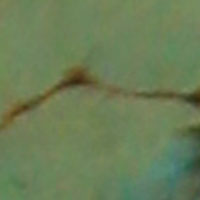


## cracking(183).jpg


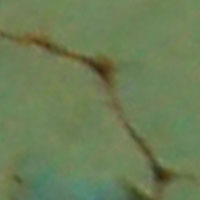


## cracking(184).jpg


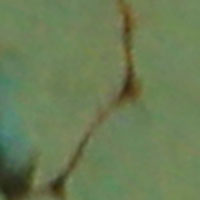


## cracking(185).jpg


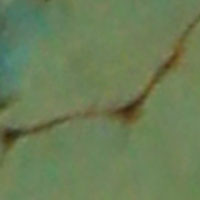


## cracking(186).jpg


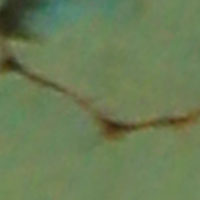


## cracking(187).jpg


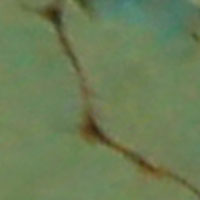


## cracking(188).jpg


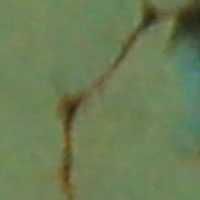


## cracking(189).jpg


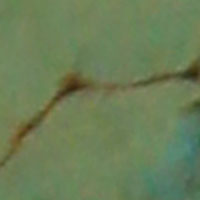


## cracking(19).jpg


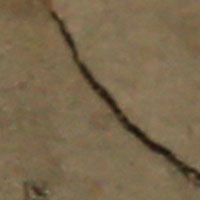


## cracking(190).jpg


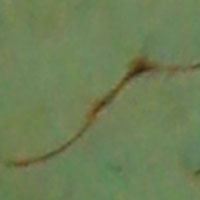


## cracking(191).jpg


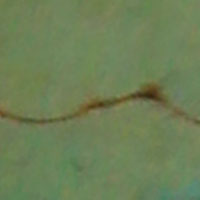


## cracking(192).jpg


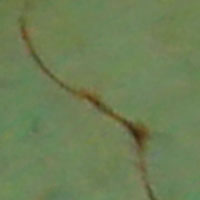


## cracking(193).jpg


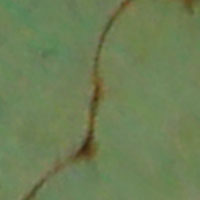


## cracking(194).jpg


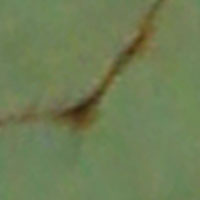


## cracking(195).jpg


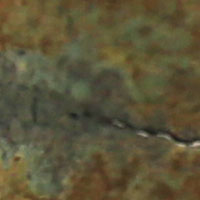


## cracking(196).jpg


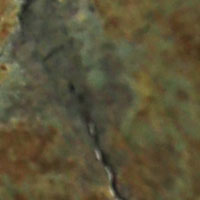


## cracking(197).jpg


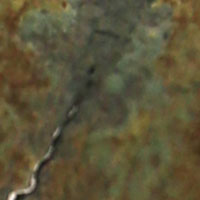


## cracking(198).jpg


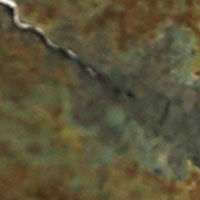


## cracking(2).jpg


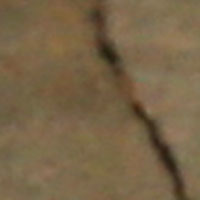


## cracking(204).jpg


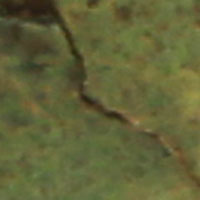


## cracking(205).jpg


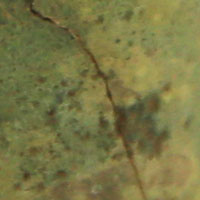


## cracking(206).jpg


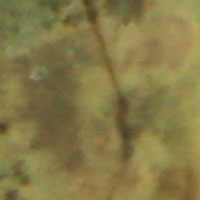


## cracking(207).jpg

## cracking(208).jpg

## cracking(209).jpg

## cracking(21).jpg

## cracking(210).jpg

## cracking(211).jpg

## cracking(212).jpg

## cracking(213).jpg

## cracking(214).jpg

## cracking(215).jpg

## cracking(216).jpg

## cracking(217).jpg

## cracking(218).jpg

## cracking(23).jpg

## cracking(24).jpg

## cracking(27).jpg

## cracking(28).jpg

## cracking(3).jpg

## cracking(30).jpg

## cracking(31).jpg

## cracking(32).jpg

## cracking(36).jpg

## cracking(37).jpg

## cracking(39).jpg

## cracking(4).jpg

## cracking(42).jpg

## cracking(43).jpg

## cracking(52).jpg

## cracking(54).jpg

## cracking(55).jpg

## cracking(57).jpg

## cracking(58).jpg

## cracking(59).jpg

## cracking(60).jpg

## cracking(61).jpg

## cracking(62).jpg

## cracking(63).jpg

## cracking(64).jpg

## cracking(66).jpg

## cracking(67).jpg

## cracking(68).jpg

## cracking(69).jpg

## cracking(70).jpg

## cracking(71).jpg

## cracking(72).jpg

## cracking(74).jpg

## cracking(76).jpg

## cracking(77).jpg

## cracking(79).jpg

## cracking(82).jpg

## cracking(83).jpg

## cracking(84).jpg

## cracking(86).jpg

## cracking(87).jpg

## cracking(92).jpg

## holes (1).jpg

## holes (100).jpg

## holes (103).jpg

## holes (106).jpg

## holes (107).jpg

## holes (108).jpg

## holes (109).jpg

## holes (11).jpg

## holes (111).jpg

## holes (112).jpg

## holes (113).jpg

## holes (114).jpg

## holes (115).jpg

## holes (117).jpg

## holes (118).jpg

## holes (12).jpg

## holes (120).jpg

## holes (121).jpg

## holes (123).jpg

## holes (125).jpg

## holes (126).jpg

## holes (127).jpg

## holes (129).jpg

## holes (13).jpg

## holes (131).jpg

## holes (132).jpg

## holes (134).jpg

## holes (135).jpg

## holes (136).jpg

## holes (137).jpg

## holes (139).jpg

## holes (14).jpg

## holes (140).jpg

## holes (143).jpg

## holes (144).jpg

## holes (145).jpg

## holes (146).jpg

## holes (147).jpg

## holes (148).jpg

## holes (15).jpg

## holes (150).jpg

## holes (151).jpg

## holes (152).jpg

## holes (153).jpg

## holes (156).jpg

## holes (158).jpg

## holes (160).jpg

## holes (161).jpg

## holes (162).jpg

## holes (163).jpg

## holes (168).jpg

## holes (169).jpg

## holes (17).jpg

## holes (171).jpg

## holes (172).jpg

## holes (173).jpg

## holes (174).jpg

## holes (175).jpg

## holes (176).jpg

## holes (177).jpg

## holes (178).jpg

## holes (18).jpg

## holes (184).jpg

## holes (186).jpg

## holes (189).jpg

## holes (19).jpg

## holes (190).jpg

## holes (193).jpg

## holes (194).jpg

## holes (195).jpg

## holes (196).jpg

## holes (197).jpg

## holes (198).jpg

## holes (199).jpg

## holes (20).jpg

## holes (200).jpg

## holes (201).jpg

## holes (202).jpg

## holes (203).jpg

## holes (204).jpg

## holes (205).jpg

## holes (206).jpg

## holes (207).jpg

## holes (208).jpg

## holes (209).jpg

## holes (21).jpg

## holes (210).jpg

## holes (211).jpg

## holes (212).jpg

## holes (214).jpg

## holes (216).jpg

## holes (218).jpg

## holes (219).jpg

## holes (22).jpg

## holes (220).jpg

## holes (221).jpg

## holes (223).jpg

## holes (224).jpg

## holes (226).jpg

## holes (228).jpg

## holes (229).jpg

## holes (23).jpg

## holes (230).jpg

## holes (231).jpg

## holes (232).jpg

## holes (234).jpg

## holes (235).jpg

## holes (237).jpg

## holes (238).jpg

## holes (239).jpg

## holes (24).jpg

## holes (240).jpg

## holes (241).jpg

## holes (242).jpg

## holes (243).jpg

## holes (244).jpg

## holes (245).jpg

## holes (246).jpg

## holes (247).jpg

## holes (248).jpg

## holes (249).jpg

## holes (25).jpg

## holes (250).jpg

## holes (251).jpg

## holes (252).jpg

## holes (255).jpg

## holes (256).jpg

## holes (257).jpg

## holes (258).jpg

## holes (259).jpg

## holes (26).jpg

## holes (260).jpg

## holes (261).jpg

## holes (263).jpg

## holes (265).jpg

## holes (266).jpg

## holes (267).jpg

## holes (268).jpg

## holes (269).jpg

## holes (27).jpg

## holes (270).jpg

## holes (271).jpg

## holes (272).jpg

## holes (273).jpg

## holes (274).jpg

## holes (275).jpg

## holes (277).jpg

## holes (278).jpg

## holes (279).jpg

## holes (28).jpg

## holes (280).jpg

## holes (281).jpg

## holes (282).jpg

## holes (284).jpg

## holes (285).jpg

## holes (286).jpg

## holes (287).jpg

## holes (288).jpg

## holes (289).jpg

## holes (29).jpg

## holes (290).jpg

## holes (291).jpg

## holes (292).jpg

## holes (293).jpg

## holes (294).jpg

## holes (295).jpg

## holes (296).jpg

## holes (297).jpg

## holes (299).jpg

## holes (3).jpg

## holes (30).jpg

## holes (31).jpg

## holes (32).jpg

## holes (33).jpg

## holes (35).jpg

## holes (37).jpg

## holes (38).jpg

## holes (39).jpg

## holes (4).jpg

## holes (40).jpg

## holes (41).jpg

## holes (42).jpg

## holes (43).jpg

## holes (44).jpg

## holes (45).jpg

## holes (47).jpg

## holes (48).jpg

## holes (49).jpg

## holes (5).jpg

## holes (50).jpg

## holes (51).jpg

## holes (52).jpg

## holes (54).jpg

## holes (56).jpg

## holes (57).jpg

## holes (58).jpg

## holes (6).jpg

## holes (60).jpg

## holes (61).jpg

## holes (62).jpg

## holes (63).jpg

## holes (64).jpg

## holes (65).jpg

## holes (66).jpg

## holes (67).jpg

## holes (68).jpg

## holes (70).jpg

## holes (71).jpg

## holes (72).jpg

## holes (73).jpg

## holes (74).jpg

## holes (75).jpg

## holes (77).jpg

## holes (78).jpg

## holes (79).jpg

## holes (8).jpg

## holes (80).jpg

## holes (82).jpg

## holes (83).jpg

## holes (84).jpg

## holes (85).jpg

## holes (86).jpg

## holes (87).jpg

## holes (88).jpg

## holes (89).jpg

## holes (9).jpg

## holes (90).jpg

## holes (91).jpg

## holes (92).jpg

## holes (93).jpg

## holes (94).jpg

## holes (95).jpg

## holes (96).jpg

## holes (97).jpg

## holes (98).jpg

## holes (99).jpg

## incomplete(10).jpg

## incomplete(100).jpg

## incomplete(101).jpg

## incomplete(103).jpg

## incomplete(104).jpg

## incomplete(105).jpg

## incomplete(106).jpg

## incomplete(107).jpg

## incomplete(108).jpg

## incomplete(11).jpg

## incomplete(110).jpg

## incomplete(111).jpg

## incomplete(114).jpg

## incomplete(115).jpg

## incomplete(116).jpg

## incomplete(117).jpg

## incomplete(118).jpg

## incomplete(12).jpg

## incomplete(123).jpg

## incomplete(124).jpg

## incomplete(125).jpg

## incomplete(126).jpg

## incomplete(127).jpg

## incomplete(128).jpg

## incomplete(129).jpg

## incomplete(13).jpg

## incomplete(130).jpg

## incomplete(132).jpg

## incomplete(133).jpg

## incomplete(134).jpg

## incomplete(135).jpg

## incomplete(136).jpg

## incomplete(137).jpg

## incomplete(138).jpg

## incomplete(139).jpg

## incomplete(14).jpg

## incomplete(140).jpg

## incomplete(141).jpg

## incomplete(142).jpg

## incomplete(143).jpg

## incomplete(144).jpg

## incomplete(145).jpg

## incomplete(146).jpg

## incomplete(147).jpg

## incomplete(149).jpg

## incomplete(151).jpg

## incomplete(154).jpg

## incomplete(156).jpg

## incomplete(158).jpg

## incomplete(16).jpg

## incomplete(160).jpg

## incomplete(161).jpg

## incomplete(163).jpg

## incomplete(164).jpg

## incomplete(166).jpg

## incomplete(167).jpg

## incomplete(168).jpg

## incomplete(169).jpg

## incomplete(170).jpg

## incomplete(171).jpg

## incomplete(172).jpg

## incomplete(173).jpg

## incomplete(175).jpg

## incomplete(177).jpg

## incomplete(178).jpg

## incomplete(180).jpg

## incomplete(181).jpg

## incomplete(182).jpg

## incomplete(183).jpg

## incomplete(184).jpg

## incomplete(185).jpg

## incomplete(186).jpg

## incomplete(187).jpg

## incomplete(188).jpg

## incomplete(189).jpg

## incomplete(19).jpg

## incomplete(190).jpg

## incomplete(191).jpg

## incomplete(192).jpg

## incomplete(193).jpg

## incomplete(194).jpg

## incomplete(196).jpg

## incomplete(197).jpg

## incomplete(198).jpg

## incomplete(199).jpg

## incomplete(2).jpg

## incomplete(20).jpg

## incomplete(201).jpg

## incomplete(202).jpg

## incomplete(203).jpg

## incomplete(204).jpg

## incomplete(205).jpg

## incomplete(206).jpg

## incomplete(207).jpg

## incomplete(209).jpg

## incomplete(21).jpg

## incomplete(210).jpg

## incomplete(211).jpg

## incomplete(212).jpg

## incomplete(213).jpg

## incomplete(214).jpg

## incomplete(215).jpg

## incomplete(216).jpg

## incomplete(217).jpg

## incomplete(218).jpg

## incomplete(219).jpg

## incomplete(22).jpg

## incomplete(220).jpg

## incomplete(222).jpg

## incomplete(223).jpg

## incomplete(224).jpg

## incomplete(226).jpg

## incomplete(227).jpg

## incomplete(23).jpg

## incomplete(231).jpg

## incomplete(234).jpg

## incomplete(235).jpg

## incomplete(236).jpg

## incomplete(237).jpg

## incomplete(238).jpg

## incomplete(239).jpg

## incomplete(240).jpg

## incomplete(241).jpg

## incomplete(242).jpg

## incomplete(243).jpg

## incomplete(244).jpg

## incomplete(245).jpg

## incomplete(247).jpg

## incomplete(248).jpg

## incomplete(249).jpg

## incomplete(25).jpg

## incomplete(250).jpg

## incomplete(252).jpg

## incomplete(254).jpg

## incomplete(255).jpg

## incomplete(256).jpg

## incomplete(257).jpg

## incomplete(258).jpg

## incomplete(259).jpg

## incomplete(26).jpg

## incomplete(260).jpg

## incomplete(261).jpg

## incomplete(262).jpg

## incomplete(263).jpg

## incomplete(264).jpg

## incomplete(265).jpg

## incomplete(266).jpg

## incomplete(267).jpg

## incomplete(268).jpg

## incomplete(27).jpg

## incomplete(270).jpg

## incomplete(271).jpg

## incomplete(272).jpg

## incomplete(273).jpg

## incomplete(274).jpg

## incomplete(275).jpg

## incomplete(276).jpg

## incomplete(277).jpg

## incomplete(278).jpg

## incomplete(279).jpg

## incomplete(28).jpg

## incomplete(281).jpg

## incomplete(282).jpg

## incomplete(283).jpg

## incomplete(284).jpg

## incomplete(285).jpg

## incomplete(286).jpg

## incomplete(287).jpg

## incomplete(288).jpg

## incomplete(289).jpg

## incomplete(290).jpg

## incomplete(291).jpg

## incomplete(292).jpg

## incomplete(293).jpg

## incomplete(294).jpg

## incomplete(295).jpg

## incomplete(297).jpg

## incomplete(299).jpg

## incomplete(3).jpg

## incomplete(30).jpg

## incomplete(31).jpg

## incomplete(33).jpg

## incomplete(35).jpg

## incomplete(37).jpg

## incomplete(38).jpg

## incomplete(39).jpg

## incomplete(40).jpg

## incomplete(41).jpg

## incomplete(42).jpg

## incomplete(43).jpg

## incomplete(44).jpg

## incomplete(45).jpg

## incomplete(46).jpg

## incomplete(47).jpg

## incomplete(48).jpg

## incomplete(49).jpg

## incomplete(51).jpg

## incomplete(54).jpg

## incomplete(55).jpg

## incomplete(58).jpg

## incomplete(6).jpg

## incomplete(62).jpg

## incomplete(64).jpg

## incomplete(66).jpg

## incomplete(67).jpg

## incomplete(68).jpg

## incomplete(7).jpg

## incomplete(71).jpg

## incomplete(72).jpg

## incomplete(73).jpg

## incomplete(74).jpg

## incomplete(75).jpg

## incomplete(76).jpg

## incomplete(77).jpg

## incomplete(79).jpg

## incomplete(8).jpg

## incomplete(80).jpg

## incomplete(81).jpg

## incomplete(83).jpg

## incomplete(85).jpg

## incomplete(86).jpg

## incomplete(88).jpg

## incomplete(89).jpg

## incomplete(9).jpg

## incomplete(90).jpg

## incomplete(92).jpg

## incomplete(93).jpg

## incomplete(94).jpg

## incomplete(95).jpg

## incomplete(96).jpg

## incomplete(97).jpg

## incomplete(98).jpg

## incomplete(99).jpg

## mineralization (1).jpg

## mineralization (100).jpg

## mineralization (103).jpg

## mineralization (104).jpg

## mineralization (105).jpg

## mineralization (106).jpg

## mineralization (108).jpg

## mineralization (109).jpg

## mineralization (110).jpg

## mineralization (111).jpg

## mineralization (112).jpg

## mineralization (113).jpg

## mineralization (115).jpg

## mineralization (116).jpg

## mineralization (117).jpg

## mineralization (118).jpg

## mineralization (121).jpg

## mineralization (122).jpg

## mineralization (123).jpg

## mineralization (126).jpg

## mineralization (127).jpg

## mineralization (128).jpg

## mineralization (129).jpg

## mineralization (13).jpg

## mineralization (130).jpg

## mineralization (131).jpg

## mineralization (132).jpg

## mineralization (133).jpg

## mineralization (134).jpg

## mineralization (135).jpg

## mineralization (136).jpg

## mineralization (137).jpg

## mineralization (138).jpg

## mineralization (139).jpg

## mineralization (14).jpg

## mineralization (140).jpg

## mineralization (141).jpg

## mineralization (142).jpg

## mineralization (144).jpg

## mineralization (145).jpg

## mineralization (146).jpg

## mineralization (147).jpg

## mineralization (148).jpg

## mineralization (15).jpg

## mineralization (151).jpg

## mineralization (152).jpg

## mineralization (153).jpg

## mineralization (154).jpg

## mineralization (155).jpg

## mineralization (156).jpg

## mineralization (157).jpg

## mineralization (158).jpg

## mineralization (159).jpg

## mineralization (16).jpg

## mineralization (160).jpg

## mineralization (161).jpg

## mineralization (162).jpg

## mineralization (163).jpg

## mineralization (164).jpg

## mineralization (165).jpg

## mineralization (166).jpg

## mineralization (168).jpg

## mineralization (169).jpg

## mineralization (17).jpg

## mineralization (170).jpg

## mineralization (171).jpg

## mineralization (173).jpg

## mineralization (175).jpg

## mineralization (176).jpg

## mineralization (178).jpg

## mineralization (180).jpg

## mineralization (181).jpg

## mineralization (182).jpg

## mineralization (183).jpg

## mineralization (184).jpg

## mineralization (186).jpg

## mineralization (187).jpg

## mineralization (188).jpg

## mineralization (189).jpg

## mineralization (19).jpg

## mineralization (190).jpg

## mineralization (191).jpg

## mineralization (193).jpg

## mineralization (194).jpg

## mineralization (195).jpg

## mineralization (196).jpg

## mineralization (197).jpg

## mineralization (198).jpg

## mineralization (199).jpg

## mineralization (2).jpg

## mineralization (20).jpg

## mineralization (201).jpg

## mineralization (202).jpg

## mineralization (203).jpg

## mineralization (204).jpg

## mineralization (205).jpg

## mineralization (207).jpg

## mineralization (208).jpg

## mineralization (21).jpg

## mineralization (211).jpg

## mineralization (212).jpg

## mineralization (213).jpg

## mineralization (214).jpg

## mineralization (215).jpg

## mineralization (217).jpg

## mineralization (218).jpg

## mineralization (219).jpg

## mineralization (22).jpg

## mineralization (221).jpg

## mineralization (222).jpg

## mineralization (223).jpg

## mineralization (224).jpg

## mineralization (225).jpg

## mineralization (226).jpg

## mineralization (227).jpg

## mineralization (228).jpg

## mineralization (229).jpg

## mineralization (230).jpg

## mineralization (231).jpg

## mineralization (232).jpg

## mineralization (233).jpg

## mineralization (234).jpg

## mineralization (235).jpg

## mineralization (237).jpg

## mineralization (238).jpg

## mineralization (239).jpg

## mineralization (24).jpg

## mineralization (241).jpg

## mineralization (242).jpg

## mineralization (243).jpg

## mineralization (244).jpg

## mineralization (245).jpg

## mineralization (246).jpg

## mineralization (249).jpg

## mineralization (25).jpg

## mineralization (251).jpg

## mineralization (252).jpg

## mineralization (253).jpg

## mineralization (254).jpg

## mineralization (255).jpg

## mineralization (256).jpg

## mineralization (257).jpg

## mineralization (258).jpg

## mineralization (259).jpg

## mineralization (26).jpg

## mineralization (261).jpg

## mineralization (262).jpg

## mineralization (264).jpg

## mineralization (265).jpg

## mineralization (267).jpg

## mineralization (268).jpg

## mineralization (269).jpg

## mineralization (27).jpg

## mineralization (270).jpg

## mineralization (271).jpg

## mineralization (272).jpg

## mineralization (273).jpg

## mineralization (274).jpg

## mineralization (278).jpg

## mineralization (279).jpg

## mineralization (28).jpg

## mineralization (281).jpg

## mineralization (282).jpg

## mineralization (283).jpg

## mineralization (285).jpg

## mineralization (286).jpg

## mineralization (287).jpg

## mineralization (288).jpg

## mineralization (289).jpg

## mineralization (29).jpg

## mineralization (290).jpg

## mineralization (292).jpg

## mineralization (293).jpg

## mineralization (294).jpg

## mineralization (295).jpg

## mineralization (297).jpg

## mineralization (298).jpg

## mineralization (299).jpg

## mineralization (3).jpg

## mineralization (30).jpg

## mineralization (300).jpg

## mineralization (31).jpg

## mineralization (32).jpg

## mineralization (33).jpg

## mineralization (34).jpg

## mineralization (37).jpg

## mineralization (38).jpg

## mineralization (40).jpg

## mineralization (43).jpg

## mineralization (45).jpg

## mineralization (46).jpg

## mineralization (47).jpg

## mineralization (48).jpg

## mineralization (49).jpg

## mineralization (5).jpg

## mineralization (50).jpg

## mineralization (51).jpg

## mineralization (53).jpg

## mineralization (54).jpg

## mineralization (55).jpg

## mineralization (56).jpg

## mineralization (57).jpg

## mineralization (58).jpg

## mineralization (59).jpg

## mineralization (6).jpg

## mineralization (60).jpg

## mineralization (61).jpg

## mineralization (62).jpg

## mineralization (63).jpg

## mineralization (65).jpg

## mineralization (66).jpg

## mineralization (67).jpg

## mineralization (68).jpg

## mineralization (69).jpg

## mineralization (7).jpg

## mineralization (70).jpg

## mineralization (71).jpg

## mineralization (72).jpg

## mineralization (73).jpg

## mineralization (74).jpg

## mineralization (75).jpg

## mineralization (76).jpg

## mineralization (77).jpg

## mineralization (78).jpg

## mineralization (79).jpg

## mineralization (8).jpg

## mineralization (80).jpg

## mineralization (81).jpg

## mineralization (82).jpg

## mineralization (83).jpg

## mineralization (84).jpg

## mineralization (85).jpg

## mineralization (86).jpg

## mineralization (87).jpg

## mineralization (88).jpg

## mineralization (89).jpg

## mineralization (9).jpg

## mineralization (90).jpg

## mineralization (92).jpg

## mineralization (94).jpg

## mineralization (95).jpg

## mineralization (96).jpg

## mineralization (97).jpg

## mineralization (98).jpg

**Val set**

## cracking(1).jpg

## cracking(10).jpg

## cracking(109).jpg

## cracking(121).jpg

## cracking(125).jpg

## cracking(133).jpg

## cracking(137).jpg

## cracking(139).jpg

## cracking(14).jpg

## cracking(15).jpg

## cracking(162).jpg

## cracking(164).jpg

## cracking(169).jpg

## cracking(178).jpg

## cracking(20).jpg

## cracking(22).jpg

## cracking(35).jpg

## cracking(38).jpg

## cracking(53).jpg

## cracking(56).jpg

## cracking(6).jpg

## cracking(65).jpg

## cracking(73).jpg

## cracking(8).jpg

## cracking(80).jpg

## cracking(81).jpg

## cracking(85).jpg

## cracking(9).jpg

## cracking(90).jpg

## cracking(91).jpg

## cracking(93).jpg

## holes (10).jpg

## holes (101).jpg

## holes (102).jpg

## holes (104).jpg

## holes (105).jpg

## holes (110).jpg

## holes (116).jpg

## holes (119).jpg

## holes (122).jpg

## holes (124).jpg

## holes (128).jpg

## holes (130).jpg

## holes (133).jpg

## holes (138).jpg

## holes (141).jpg

## holes (142).jpg

## holes (149).jpg

## holes (154).jpg

## holes (155).jpg

## holes (157).jpg

## holes (159).jpg

## holes (16).jpg

## holes (165).jpg

## holes (166).jpg

## holes (167).jpg

## holes (170).jpg

## holes (179).jpg

## holes (180).jpg

## holes (181).jpg

## holes (182).jpg

## holes (183).jpg

## holes (185).jpg

## holes (187).jpg

## holes (188).jpg

## holes (191).jpg

## holes (192).jpg

## holes (2).jpg

## holes (213).jpg

## holes (215).jpg

## holes (217).jpg

## holes (222).jpg

## holes (225).jpg

## holes (227).jpg

## holes (233).jpg

## holes (236).jpg

## holes (253).jpg

## holes (254).jpg

## holes (262).jpg

## holes (264).jpg

## holes (276).jpg

## holes (283).jpg

## holes (298).jpg

## holes (34).jpg

## holes (36).jpg

## holes (46).jpg

## holes (53).jpg

## holes (55).jpg

## holes (59).jpg

## holes (69).jpg

## holes (7).jpg

## holes (76).jpg

## holes (81).jpg

## incomplete(102).jpg

## incomplete(109).jpg

## incomplete(112).jpg

## incomplete(113).jpg

## incomplete(119).jpg

## incomplete(120).jpg

## incomplete(121).jpg

## incomplete(122).jpg

## incomplete(131).jpg

## incomplete(148).jpg

## incomplete(15).jpg

## incomplete(150).jpg

## incomplete(152).jpg

## incomplete(153).jpg

## incomplete(157).jpg

## incomplete(159).jpg

## incomplete(162).jpg

## incomplete(165).jpg

## incomplete(17).jpg

## incomplete(174).jpg

## incomplete(176).jpg

## incomplete(179).jpg

## incomplete(18).jpg

## incomplete(195).jpg

## incomplete(200).jpg

## incomplete(208).jpg

## incomplete(221).jpg

## incomplete(225).jpg

## incomplete(228).jpg

## incomplete(229).jpg

## incomplete(230).jpg

## incomplete(232).jpg

## incomplete(233).jpg

## incomplete(24).jpg

## incomplete(246).jpg

## incomplete(251).jpg

## incomplete(253).jpg

## incomplete(269).jpg

## incomplete(280).jpg

## incomplete(29).jpg

## incomplete(296).jpg

## incomplete(298).jpg

## incomplete(300).jpg

## incomplete(32).jpg

## incomplete(34).jpg

## incomplete(36).jpg

## incomplete(4).jpg

## incomplete(5).jpg

## incomplete(50).jpg

## incomplete(52).jpg

## incomplete(53).jpg

## incomplete(56).jpg

## incomplete(57).jpg

## incomplete(59).jpg

## incomplete(60).jpg

## incomplete(61).jpg

## incomplete(63).jpg

## incomplete(65).jpg

## incomplete(69).jpg

## incomplete(70).jpg

## incomplete(78).jpg

## incomplete(82).jpg

## incomplete(84).jpg

## incomplete(87).jpg

## incomplete(91).jpg

## mineralization (10).jpg

## mineralization (101).jpg

## mineralization (102).jpg

## mineralization (107).jpg

## mineralization (11).jpg

## mineralization (114).jpg

## mineralization (119).jpg

## mineralization (12).jpg

## mineralization (120).jpg

## mineralization (124).jpg

## mineralization (125).jpg

## mineralization (143).jpg

## mineralization (149).jpg

## mineralization (150).jpg

## mineralization (167).jpg

## mineralization (172).jpg

## mineralization (174).jpg

## mineralization (177).jpg

## mineralization (179).jpg

## mineralization (18).jpg

## mineralization (185).jpg

## mineralization (192).jpg

## mineralization (200).jpg

## mineralization (206).jpg

## mineralization (209).jpg

## mineralization (210).jpg

## mineralization (216).jpg

## mineralization (220).jpg

## mineralization (23).jpg

## mineralization (236).jpg

## mineralization (240).jpg

## mineralization (247).jpg

## mineralization (248).jpg

## mineralization (250).jpg

## mineralization (260).jpg

## mineralization (263).jpg

## mineralization (266).jpg

## mineralization (275).jpg

## mineralization (276).jpg

## mineralization (277).jpg

## mineralization (280).jpg

## mineralization (284).jpg

## mineralization (291).jpg

## mineralization (296).jpg

## mineralization (35).jpg

## mineralization (36).jpg

## mineralization (39).jpg

## mineralization (4).jpg

## mineralization (41).jpg

## mineralization (42).jpg

## mineralization (44).jpg

## mineralization (52).jpg

## mineralization (64).jpg

## mineralization (91).jpg

## mineralization (93).jpg

## mineralization (99).jpg
